# Supplementary material for: Identification of driver genes and biological signaling for alcoholic myopathy
Source: Research Square preprint supplement (doi:10.21203/rs.3.rs-1157143/v1), 2021-12-10
Supplement: Supplementary file 1 [file 1a139eaa68bd56a833182005.xlsx]

## Sheet: result reactome
Pathway identifier	Pathway name	#Entities found	#Entities total	Entities ratio	Entities pValue	Entities FDR	#Reactions found	#Reactions total	Reactions ratio	Species identifier	Species name	Submitted entities found	Mapped entities	Found reaction identifiers
R-HSA-9009391	Extra-nuclear estrogen signaling	9	111	0.00777801	0.00411546	0.668153	18	38	0.00279885	9606	Homo sapiens	Ccnd1;Akt3;Mmp2;Gnai2;Gng8;S1pr3;Dact3;Esr2		R-HSA-9021609;R-HSA-199298;R-HSA-9624272;R-HSA-9632182;R-HSA-9021068;R-HSA-9633044;R-HSA-9625813;R-HSA-9021601;R-HSA-9021600;R-HSA-9623355;R-HSA-9021596;R-HSA-9021660;R-HSA-9021072;R-HSA-9021170;R-HSA-9624526;R-HSA-9021079;R-HSA-9027670;R-HSA-9623341
R-HSA-8939211	ESR-mediated signaling	14	257	0.0180085	0.0131435	0.668153	34	111	0.00817559	9606	Homo sapiens	Cxcl12;Ccnd1;Ccnt1;Mmp2;Akt3;Gnai2;Gng8;S1pr3;Cxxc5;Dact3;Esr2		R-HSA-199298;R-HSA-9624272;R-HSA-9038029;R-HSA-9021068;R-HSA-9633044;R-HSA-9625813;R-HSA-8939201;R-HSA-9011971;R-HSA-8939203;R-HSA-9012315;R-HSA-9009371;R-HSA-9021596;R-HSA-9021660;R-HSA-9012319;R-HSA-9018334;R-HSA-8954207;R-HSA-9021072;R-HSA-9624526;R-HSA-9018325;R-HSA-9021079;R-HSA-8954199;R-HSA-9027670;R-HSA-9021609;R-HSA-9009065;R-HSA-9632182;R-HSA-9011949;R-HSA-9021601;R-HSA-9021600;R-HSA-96…
R-HSA-1592389	Activation of Matrix Metalloproteinases	4	35	0.00245253	0.0167087	0.668153	12	27	0.00198866	9606	Homo sapiens	Mmp15;Mmp2;Tpsab1		R-HSA-1604360;R-HSA-1592297;R-HSA-1592316;R-HSA-1604350;R-HSA-1604368;R-HSA-1605825;R-HSA-1604690;R-HSA-1602466;R-HSA-1592436;R-HSA-1604741;R-HSA-1592278;R-HSA-1604359
R-HSA-9013508	NOTCH3 Intracellular Domain Regulates Transcription	4	36	0.0025226	0.0183115	0.668153	5	22	0.00162039	9606	Homo sapiens	Plxnd1;Hes1		R-HSA-9021451;R-HSA-9021450;R-HSA-9021325;R-HSA-9013567;R-HSA-9013652
R-HSA-5635838	Activation of SMO	3	20	0.00140144	0.0184423	0.668153	2	9	0.000662886	9606	Homo sapiens	Iqce;Gas1;Efcab7		R-HSA-5632668;R-HSA-5633051
R-HSA-2129379	Molecules associated with elastic fibres	4	38	0.00266274	0.0217954	0.668153	5	10	0.00073654	9606	Homo sapiens	Eln;Emilin1;Emilin2;Ltbp4		R-HSA-2395364;R-HSA-2161282;R-HSA-2328033;R-HSA-2328048;R-HSA-1592387
R-HSA-392518	Signal amplification	4	41	0.00287296	0.027734	0.668153	13	19	0.00139943	9606	Homo sapiens	Gnai2;Gng8;Pla2g4a;Dact3		R-HSA-392195;R-HSA-428961;R-HSA-428750;R-HSA-428909;R-HSA-428749;R-HSA-392202;R-HSA-428918;R-HSA-428917;R-HSA-418581;R-HSA-418579;R-HSA-428752;R-HSA-418576;R-HSA-392187
R-HSA-9012852	Signaling by NOTCH3	5	63	0.00441455	0.0315539	0.668153	6	37	0.0027252	9606	Homo sapiens	Plxnd1;Mib2;Hes1		R-HSA-9021451;R-HSA-9021450;R-HSA-9013069;R-HSA-9021325;R-HSA-9013567;R-HSA-9013652
R-HSA-8951430	RUNX3 regulates WNT signaling	2	10	0.000700722	0.0315726	0.668153	2	5	0.00036827	9606	Homo sapiens	Ccnd1		R-HSA-8951442;R-HSA-8951443
R-HSA-8853659	RET signaling	4	43	0.0030131	0.0321784	0.668153	3	24	0.0017677	9606	Homo sapiens	Dok2;Shank3;Irs2;Pik3cd		R-HSA-8855617;R-HSA-8855915;R-HSA-8854905
R-HSA-392170	ADP signalling through P2Y purinoceptor 12	3	26	0.00182188	0.03597	0.668153	3	4	0.000294616	9606	Homo sapiens	Gnai2;Gng8;Dact3		R-HSA-392195;R-HSA-392187;R-HSA-392202
R-HSA-389357	CD28 dependent PI3K/Akt signaling	3	26	0.00182188	0.03597	0.668153	6	9	0.000662886	9606	Homo sapiens	Akt3;Map3k8;Map3k14		R-HSA-2317314;R-HSA-198640;R-HSA-392530;R-HSA-2317332;R-HSA-389756;R-HSA-198270
R-HSA-2022377	Metabolism of Angiotensinogen to Angiotensins	3	27	0.00189195	0.0394949	0.668153	3	20	0.00147308	9606	Homo sapiens	Ctsz;Anpep;Cpa3		R-HSA-2022381;R-HSA-2022393;R-HSA-2028294
R-HSA-1566948	Elastic fibre formation	4	46	0.00322332	0.0395839	0.668153	8	17	0.00125212	9606	Homo sapiens	Eln;Emilin1;Emilin2;Ltbp4		R-HSA-2395364;R-HSA-2161282;R-HSA-2328033;R-HSA-2328048;R-HSA-2129353;R-HSA-1592387;R-HSA-2161293;R-HSA-2129375
R-HSA-1442490	Collagen degradation	5	69	0.00483498	0.0436801	0.668153	14	34	0.00250424	9606	Homo sapiens	Col6a1;Mmp15;Col6a2;Mmp2;Col8a1		R-HSA-2482180;R-HSA-1564179;R-HSA-1564112;R-HSA-1564120;R-HSA-1454822;R-HSA-1454757;R-HSA-1564164;R-HSA-2473584;R-HSA-1564143;R-HSA-2473596;R-HSA-1564142;R-HSA-2537499;R-HSA-1564169;R-HSA-2473594
R-HSA-392451	G beta:gamma signalling through PI3Kgamma	3	29	0.00203209	0.0470479	0.668153	3	4	0.000294616	9606	Homo sapiens	Akt3;Gng8;Dact3		R-HSA-392295;R-HSA-392300;R-HSA-9603279
R-HSA-9634638	Estrogen-dependent nuclear events downstream of ESR-membrane signaling	3	29	0.00203209	0.0470479	0.668153	4	12	0.000883848	9606	Homo sapiens	Ccnd1;Akt3		R-HSA-199298;R-HSA-9623355;R-HSA-9624526;R-HSA-9623341
R-HSA-174362	Transport and synthesis of PAPS	2	13	0.000910938	0.0505852	0.668153	3	4	0.000294616	9606	Homo sapiens	Sat1;Papss1		R-HSA-427555;R-HSA-174389;R-HSA-174392
R-HSA-6799990	Metal sequestration by antimicrobial proteins	2	13	0.000910938	0.0505852	0.668153	2	5	0.00036827	9606	Homo sapiens	S100a9;S100a8		R-HSA-6798528;R-HSA-6798474
R-HSA-418592	ADP signalling through P2Y purinoceptor 1	3	30	0.00210217	0.0510715	0.668153	4	7	0.000515578	9606	Homo sapiens	Gng8;Pla2g4a;Dact3		R-HSA-418581;R-HSA-418579;R-HSA-418576;R-HSA-428961
R-HSA-3371598	Defective BTD causes biotidinase deficiency	1	2	0.000140144	0.0535911	0.668153	2	2	0.000147308	9606	Homo sapiens	Btd		R-HSA-3325540;R-HSA-4225086
R-HSA-388841	Costimulation by the CD28 family	6	97	0.006797	0.053825	0.668153	8	35	0.00257789	9606	Homo sapiens	H2-Eb1;Akt3;Map3k8;H2-Aa;Map3k14;H2-Ab1		R-HSA-2317314;R-HSA-198640;R-HSA-392530;R-HSA-2317332;R-HSA-389756;R-HSA-389758;R-HSA-390329;R-HSA-198270
R-HSA-1474228	Degradation of the extracellular matrix	8	148	0.0103707	0.0548097	0.668153	39	105	0.00773367	9606	Homo sapiens	Col6a1;Mmp15;Col6a2;Eln;Mmp2;Col8a1;Tpsab1		R-HSA-2514790;R-HSA-8940554;R-HSA-1564179;R-HSA-2534240;R-HSA-3791295;R-HSA-1564112;R-HSA-1604368;R-HSA-1604690;R-HSA-2534248;R-HSA-1592278;R-HSA-1564120;R-HSA-1604360;R-HSA-1454791;R-HSA-1564164;R-HSA-1566979;R-HSA-3791149;R-HSA-2473584;R-HSA-2473596;R-HSA-1605825;R-HSA-1604741;R-HSA-1564169;R-HSA-2473594;R-HSA-8943959;R-HSA-1604359;R-HSA-2482180;R-HSA-1592316;R-HSA-1566962;R-HSA-1604350;R-HSA-2…
R-HSA-400042	Adrenaline,noradrenaline inhibits insulin secretion	3	32	0.00224231	0.0595994	0.668153	5	6	0.000441924	9606	Homo sapiens	Gnai2;Gng8;Dact3		R-HSA-400037;R-HSA-400097;R-HSA-400046;R-HSA-400063;R-HSA-400092
R-HSA-2980736	Peptide hormone metabolism	7	127	0.00889917	0.0642251	0.668153	10	63	0.0046402	9606	Homo sapiens	Ache;Fap;Ctsz;Anpep;Inha;Pla2g7;Cpa3		R-HSA-9023627;R-HSA-2022381;R-HSA-9023626;R-HSA-2022393;R-HSA-9023617;R-HSA-2028294;R-HSA-9023633;R-HSA-9023632;R-HSA-9023619;R-HSA-378975
R-HSA-381426	Regulation of Insulin-like Growth Factor (IGF) transport and uptake by Insulin-like Growth Factor Binding Proteins (IGFBPs)	7	127	0.00889917	0.0642251	0.668153	2	14	0.00103116	9606	Homo sapiens	Mmp2;Hrc;Tmem132a;Ano8;Fstl1;Gas6;Fam20a		R-HSA-8952289;R-HSA-381435
R-HSA-9027276	Erythropoietin activates Phosphoinositide-3-kinase (PI3K)	2	16	0.00112115	0.0726725	0.668153	7	7	0.000515578	9606	Homo sapiens	Irs2;Pik3cd		R-HSA-9027273;R-HSA-9027272;R-HSA-9021627;R-HSA-9027275;R-HSA-9012657;R-HSA-9027281;R-HSA-9027280
R-HSA-8941856	RUNX3 regulates NOTCH signaling	2	16	0.00112115	0.0726725	0.668153	4	7	0.000515578	9606	Homo sapiens	Hes1		R-HSA-1980047;R-HSA-8878243;R-HSA-4396347;R-HSA-8878237
R-HSA-2197563	NOTCH2 intracellular domain regulates transcription	2	16	0.00112115	0.0726725	0.668153	2	9	0.000662886	9606	Homo sapiens	Hes1		R-HSA-2976716;R-HSA-2197562
R-HSA-176034	Interactions of Tat with host cellular proteins	1	3	0.000210217	0.0793025	0.668153	2	2	0.000147308	9606	Homo sapiens	Ccnt1		R-HSA-167234;R-HSA-167235
R-HSA-5619053	Defective SLC22A5 causes systemic primary carnitine deficiency (CDSP)	1	3	0.000210217	0.0793025	0.668153	1	1	7.3654e-05	9606	Homo sapiens	Slc22a4		R-HSA-5625674
R-HSA-5624958	ARL13B-mediated ciliary trafficking of INPP5E	1	3	0.000210217	0.0793025	0.668153	2	4	0.000294616	9606	Homo sapiens	Arl13b		R-HSA-5638012;R-HSA-5624953
R-HSA-432030	Transport of glycerol from adipocytes to the liver by Aquaporins	1	3	0.000210217	0.0793025	0.668153	1	2	0.000147308	9606	Homo sapiens	Aqp7		R-HSA-432074
R-HSA-8957275	Post-translational protein phosphorylation	6	109	0.00763787	0.0833137	0.668153	1	1	7.3654e-05	9606	Homo sapiens	Hrc;Tmem132a;Ano8;Fstl1;Gas6;Fam20a		R-HSA-8952289
R-HSA-5668599	RHO GTPases Activate NADPH Oxidases	3	38	0.00266274	0.0887975	0.668153	11	14	0.00103116	9606	Homo sapiens	Ncf1;S100a9;S100a8		R-HSA-9626848;R-HSA-9626832;R-HSA-9626880;R-HSA-9626816;R-HSA-5668629;R-HSA-9626817;R-HSA-5218827;R-HSA-5218841;R-HSA-5668735;R-HSA-5668605;R-HSA-5668731
R-HSA-1980145	Signaling by NOTCH2	3	38	0.00266274	0.0887975	0.668153	3	20	0.00147308	9606	Homo sapiens	Mib2;Hes1		R-HSA-2976716;R-HSA-2197562;R-HSA-2172172
R-HSA-1482883	Acyl chain remodeling of DAG and TAG	2	18	0.0012613	0.0888037	0.668153	2	8	0.000589232	9606	Homo sapiens	Awat2;Mgl2;Mgll		R-HSA-5696448;R-HSA-1482543
R-HSA-397795	G-protein beta:gamma signalling	3	39	0.00273281	0.0941532	0.668153	13	15	0.00110481	9606	Homo sapiens	Akt3;Gng8;Dact3		R-HSA-392295;R-HSA-8964271;R-HSA-392300;R-HSA-8964614;R-HSA-8964634;R-HSA-8964604;R-HSA-8964605;R-HSA-8964317;R-HSA-398193;R-HSA-8964241;R-HSA-9603279;R-HSA-398040;R-HSA-8964599
R-HSA-389356	CD28 co-stimulation	3	39	0.00273281	0.0941532	0.668153	6	19	0.00139943	9606	Homo sapiens	Akt3;Map3k8;Map3k14		R-HSA-2317314;R-HSA-198640;R-HSA-392530;R-HSA-2317332;R-HSA-389756;R-HSA-198270
R-HSA-8964315	G beta:gamma signalling through BTK	2	19	0.00133137	0.0972299	0.668153	3	3	0.000220962	9606	Homo sapiens	Gng8;Dact3		R-HSA-8964317;R-HSA-8964271;R-HSA-8964241
R-HSA-9674519	Defective F8 sulfation at Y1699	1	4	0.000280289	0.104317	0.668153	1	1	7.3654e-05	9606	Homo sapiens	Tpst1		R-HSA-9668148
R-HSA-210744	Regulation of gene expression in late stage (branching morphogenesis) pancreatic bud precursor cells	2	20	0.00140144	0.105871	0.668153	2	4	0.000294616	9606	Homo sapiens	Hes1		R-HSA-1980047;R-HSA-210836
R-HSA-202430	Translocation of ZAP-70 to Immunological synapse	3	42	0.00294303	0.110981	0.668153	4	4	0.000294616	9606	Homo sapiens	H2-Eb1;H2-Aa;H2-Ab1		R-HSA-8855381;R-HSA-202168;R-HSA-202344;R-HSA-202174
R-HSA-76002	Platelet activation, signaling and aggregation	12	293	0.0205311	0.114695	0.668153	26	116	0.00854386	9606	Homo sapiens	Clec3b;Mgl2;Fam3c;Pla2g4a;Sod3;Dact3;Bcar1;Apoh;Gnai2;Gng8;Lgals3bp;Gas6;Mgll		R-HSA-396996;R-HSA-397891;R-HSA-392195;R-HSA-428750;R-HSA-428749;R-HSA-396941;R-HSA-397835;R-HSA-392202;R-HSA-372693;R-HSA-418581;R-HSA-482772;R-HSA-418579;R-HSA-428752;R-HSA-418576;R-HSA-372697;R-HSA-372705;R-HSA-428961;R-HSA-481007;R-HSA-428909;R-HSA-428918;R-HSA-428917;R-HSA-481009;R-HSA-114552;R-HSA-426043;R-HSA-392187;R-HSA-114558
R-HSA-8964616	G beta:gamma signalling through CDC42	2	21	0.00147152	0.11471	0.668153	5	6	0.000441924	9606	Homo sapiens	Gng8;Dact3		R-HSA-8964634;R-HSA-8964604;R-HSA-8964605;R-HSA-8964614;R-HSA-8964599
R-HSA-2022090	Assembly of collagen fibrils and other multimeric structures	4	67	0.00469484	0.115607	0.668153	2	26	0.001915	9606	Homo sapiens	Col6a1;Col6a2;Pcolce;Col8a1		R-HSA-2022141;R-HSA-2213207
R-HSA-9006931	Signaling by Nuclear Receptors	15	387	0.0271179	0.11918	0.668153	35	192	0.0141416	9606	Homo sapiens	Cxcl12;Ccnd1;Ccnt1;Mmp2;Akt3;Gnai2;Gng8;S1pr3;Cxxc5;Dact3;Pdk2;Esr2		R-HSA-199298;R-HSA-9624272;R-HSA-9038029;R-HSA-9021068;R-HSA-9633044;R-HSA-9625813;R-HSA-8939201;R-HSA-9011971;R-HSA-8939203;R-HSA-9012315;R-HSA-9009371;R-HSA-9021596;R-HSA-9021660;R-HSA-9012319;R-HSA-9018334;R-HSA-8954207;R-HSA-9021072;R-HSA-9624526;R-HSA-9018325;R-HSA-9021079;R-HSA-8954199;R-HSA-9027670;R-HSA-9021609;R-HSA-9009065;R-HSA-9632182;R-HSA-9011949;R-HSA-9021601;R-HSA-9021600;R-HSA-96…
R-HSA-8948216	Collagen chain trimerization	3	44	0.00308318	0.122791	0.668153	2	28	0.00206231	9606	Homo sapiens	Col6a1;Col6a2;Col8a1		R-HSA-8944218;R-HSA-8944247
R-HSA-1474244	Extracellular matrix organization	13	329	0.0230537	0.126094	0.668153	78	319	0.0234956	9606	Homo sapiens	Col6a1;Mmp15;Col6a2;Mmp2;Eln;Pcolce;Emilin1;Emilin2;Col8a1;Ltbp4;Adam19;Tpsab1		R-HSA-8948232;R-HSA-8948234;R-HSA-2002460;R-HSA-8940554;R-HSA-1564179;R-HSA-3791295;R-HSA-8948224;R-HSA-1604368;R-HSA-8948226;R-HSA-8948228;R-HSA-8948230;R-HSA-8948231;R-HSA-1604360;R-HSA-1564164;R-HSA-1566979;R-HSA-3791149;R-HSA-2002440;R-HSA-4084903;R-HSA-1604741;R-HSA-1564169;R-HSA-2466106;R-HSA-1604359;R-HSA-2482180;R-HSA-2161282;R-HSA-2022073;R-HSA-1454781;R-HSA-2327695;R-HSA-2161293;R-HSA-1…
R-HSA-5579011	Defective CYP2U1 causes SPG56	1	5	0.000350361	0.128654	0.668153	1	1	7.3654e-05	9606	Homo sapiens	Cyp2u1		R-HSA-5602242
R-HSA-8941237	Invadopodia formation	1	5	0.000350361	0.128654	0.668153	1	1	7.3654e-05	9606	Homo sapiens	Adam19		R-HSA-8941234
R-HSA-5368598	Negative regulation of TCF-dependent signaling by DVL-interacting proteins	1	5	0.000350361	0.128654	0.668153	1	2	0.000147308	9606	Homo sapiens	Cxxc4		R-HSA-5368582
R-HSA-8981607	Intracellular oxygen transport	1	5	0.000350361	0.128654	0.668153	2	6	0.000441924	9606	Homo sapiens	Cygb		R-HSA-8982617;R-HSA-5340214
R-HSA-202427	Phosphorylation of CD3 and TCR zeta chains	3	45	0.00315325	0.128861	0.668153	5	7	0.000515578	9606	Homo sapiens	H2-Eb1;H2-Aa;H2-Ab1		R-HSA-202291;R-HSA-202214;R-HSA-202165;R-HSA-202233;R-HSA-8852200
R-HSA-389948	PD-1 signaling	3	45	0.00315325	0.128861	0.668153	1	5	0.00036827	9606	Homo sapiens	H2-Eb1;H2-Aa;H2-Ab1		R-HSA-389758
R-HSA-418217	G beta:gamma signalling through PLC beta	2	23	0.00161166	0.132912	0.668153	2	2	0.000147308	9606	Homo sapiens	Gng8;Dact3		R-HSA-398193;R-HSA-398040
R-HSA-500657	Presynaptic function of Kainate receptors	2	23	0.00161166	0.132912	0.668153	1	2	0.000147308	9606	Homo sapiens	Gng8;Dact3		R-HSA-500717
R-HSA-975576	N-glycan antennae elongation in the medial/trans-Golgi	3	46	0.00322332	0.135035	0.668153	3	14	0.00103116	9606	Homo sapiens	St8sia6;Kctd15;Fut4		R-HSA-5693925;R-HSA-6786034;R-HSA-1022133
R-HSA-9018519	Estrogen-dependent gene expression	7	154	0.0107911	0.136141	0.668153	12	66	0.00486116	9606	Homo sapiens	Cxcl12;Ccnd1;Ccnt1;Cxxc5		R-HSA-9009065;R-HSA-9012315;R-HSA-9009371;R-HSA-9011949;R-HSA-9012319;R-HSA-9018334;R-HSA-8954207;R-HSA-9011952;R-HSA-9011971;R-HSA-9009378;R-HSA-9018325;R-HSA-8954199
R-HSA-392851	Prostacyclin signalling through prostacyclin receptor	2	24	0.00168173	0.142243	0.668153	3	4	0.000294616	9606	Homo sapiens	Gng8;Dact3		R-HSA-392852;R-HSA-392870;R-HSA-392874
R-HSA-9706374	FLT3 signaling through SRC family kinases	1	6	0.000420433	0.152331	0.668153	4	4	0.000294616	9606	Homo sapiens	Flt3l		R-HSA-9706336;R-HSA-9609274;R-HSA-9605259;R-HSA-9706312
R-HSA-3065679	SUMO is proteolytically processed	1	6	0.000420433	0.152331	0.668153	3	3	0.000220962	9606	Homo sapiens	Senp5		R-HSA-2990840;R-HSA-2990842;R-HSA-2993763
R-HSA-8866911	TFAP2 (AP-2) family regulates transcription of cell cycle factors	1	6	0.000420433	0.152331	0.668153	3	4	0.000294616	9606	Homo sapiens	Jarid2		R-HSA-8865265;R-HSA-8865280;R-HSA-8865256
R-HSA-211163	AKT-mediated inactivation of FOXO1A	1	6	0.000420433	0.152331	0.668153	1	2	0.000147308	9606	Homo sapiens	Akt3		R-HSA-211164
R-HSA-1650814	Collagen biosynthesis and modifying enzymes	4	76	0.00532549	0.159563	0.668153	23	51	0.00375635	9606	Homo sapiens	Col6a1;Col6a2;Pcolce;Col8a1		R-HSA-8948232;R-HSA-1650808;R-HSA-8948234;R-HSA-2002460;R-HSA-1614460;R-HSA-1614461;R-HSA-2022073;R-HSA-8948224;R-HSA-8948226;R-HSA-2089971;R-HSA-8948228;R-HSA-1981104;R-HSA-8948230;R-HSA-8948231;R-HSA-8944218;R-HSA-8948219;R-HSA-8948222;R-HSA-1981128;R-HSA-2002440;R-HSA-1980233;R-HSA-1981157;R-HSA-1981120;R-HSA-8944247
R-HSA-991365	Activation of GABAB receptors	3	50	0.00350361	0.16069	0.668153	8	8	0.000589232	9606	Homo sapiens	Gnai2;Gng8;Dact3		R-HSA-170674;R-HSA-1013020;R-HSA-170666;R-HSA-1013013;R-HSA-1013012;R-HSA-392206;R-HSA-170686;R-HSA-170671
R-HSA-977444	GABA B receptor activation	3	50	0.00350361	0.16069	0.668153	8	9	0.000662886	9606	Homo sapiens	Gnai2;Gng8;Dact3		R-HSA-170674;R-HSA-1013020;R-HSA-170666;R-HSA-1013013;R-HSA-1013012;R-HSA-392206;R-HSA-170686;R-HSA-170671
R-HSA-5602498	MyD88 deficiency (TLR2/4)	2	26	0.00182188	0.161294	0.668153	2	2	0.000147308	9606	Homo sapiens	S100a9;S100a8		R-HSA-5602383;R-HSA-5602606
R-HSA-202040	G-protein activation	2	26	0.00182188	0.161294	0.668153	5	6	0.000441924	9606	Homo sapiens	Gng8;Dact3		R-HSA-167408;R-HSA-167429;R-HSA-167419;R-HSA-167433;R-HSA-112271
R-HSA-422085	Synthesis, secretion, and deacylation of Ghrelin	2	26	0.00182188	0.161294	0.668153	2	8	0.000589232	9606	Homo sapiens	Ache;Pla2g7		R-HSA-9023617;R-HSA-9023619
R-HSA-9013695	NOTCH4 Intracellular Domain Regulates Transcription	2	26	0.00182188	0.161294	0.668153	1	9	0.000662886	9606	Homo sapiens	Hes1		R-HSA-9013711
R-HSA-5603041	IRAK4 deficiency (TLR2/4)	2	27	0.00189195	0.170985	0.668153	2	2	0.000147308	9606	Homo sapiens	S100a9;S100a8		R-HSA-5602353;R-HSA-5602672
R-HSA-74713	IRS activation	1	7	0.000490505	0.175366	0.668153	3	3	0.000220962	9606	Homo sapiens	Irs2		R-HSA-74707;R-HSA-74711;R-HSA-74712
R-HSA-9706377	FLT3 signaling by CBL mutants	1	7	0.000490505	0.175366	0.668153	1	1	7.3654e-05	9606	Homo sapiens	Flt3l		R-HSA-9706356
R-HSA-3134973	LRR FLII-interacting protein 1 (LRRFIP1) activates type I IFN production	1	7	0.000490505	0.175366	0.668153	3	5	0.00036827	9606	Homo sapiens	Lrrfip1		R-HSA-3134904;R-HSA-3134901;R-HSA-3134896
R-HSA-975578	Reactions specific to the complex N-glycan synthesis pathway	2	28	0.00196202	0.18077	0.668153	2	7	0.000515578	9606	Homo sapiens	Kctd15;Fut4		R-HSA-5693925;R-HSA-6786034
R-HSA-6804115	TP53 regulates transcription of additional cell cycle genes whose exact role in the p53 pathway remain uncertain	2	28	0.00196202	0.18077	0.668153	2	14	0.00103116	9606	Homo sapiens	Rgcc		R-HSA-6803917;R-HSA-6803914
R-HSA-381340	Transcriptional regulation of white adipocyte differentiation	5	109	0.00763787	0.184374	0.668153	13	18	0.00132577	9606	Homo sapiens	Med11;Klf5;Ebf1		R-HSA-1183058;R-HSA-560491;R-HSA-381377;R-HSA-560493;R-HSA-381283;R-HSA-1183003;R-HSA-560517;R-HSA-560472;R-HSA-560473;R-HSA-560510;R-HSA-381309;R-HSA-977271;R-HSA-560498
R-HSA-4086398	Ca2+ pathway	4	81	0.00567585	0.186263	0.668153	11	27	0.00198866	9606	Homo sapiens	Fzd2;Camk2a;Gng8;Dact3		R-HSA-4332358;R-HSA-4332359;R-HSA-4332356;R-HSA-4332388;R-HSA-398193;R-HSA-3965444;R-HSA-4332363;R-HSA-3965446;R-HSA-3965447;R-HSA-3965441;R-HSA-398040
R-HSA-6811440	Retrograde transport at the Trans-Golgi-Network	3	55	0.00385397	0.194592	0.668153	5	20	0.00147308	9606	Homo sapiens	Tmf1;Cog7;Sat1		R-HSA-6811431;R-HSA-6811429;R-HSA-6811428;R-HSA-6814091;R-HSA-6814682
R-HSA-114608	Platelet degranulation	6	141	0.00988018	0.196004	0.668153	3	11	0.000810194	9606	Homo sapiens	Clec3b;Apoh;Fam3c;Sod3;Lgals3bp;Gas6		R-HSA-482772;R-HSA-481009;R-HSA-481007
R-HSA-8849470	PTK6 Regulates Cell Cycle	1	8	0.000560577	0.197777	0.668153	2	2	0.000147308	9606	Homo sapiens	Ccnd1		R-HSA-8848436;R-HSA-8848414
R-HSA-75158	TRAIL signaling	1	8	0.000560577	0.197777	0.668153	5	6	0.000441924	9606	Homo sapiens	Tnfsf10		R-HSA-141139;R-HSA-75187;R-HSA-141316;R-HSA-75238;R-HSA-75146
R-HSA-5632681	Ligand-receptor interactions	1	8	0.000560577	0.197777	0.668153	1	4	0.000294616	9606	Homo sapiens	Gas1		R-HSA-5632649
R-HSA-428930	Thromboxane signalling through TP receptor	2	30	0.00210217	0.200571	0.668153	6	8	0.000589232	9606	Homo sapiens	Gng8;Dact3		R-HSA-428918;R-HSA-428917;R-HSA-428752;R-HSA-428750;R-HSA-428909;R-HSA-428749
R-HSA-933542	TRAF6 mediated NF-kB activation	2	30	0.00210217	0.200571	0.668153	3	4	0.000294616	9606	Homo sapiens	Bcam;Rnf135		R-HSA-933530;R-HSA-168166;R-HSA-933528
R-HSA-111885	Opioid Signalling	5	113	0.00791816	0.203249	0.668153	15	59	0.00434558	9606	Homo sapiens	Camk2a;Gnai2;Gng8;Pla2g4a;Dact3		R-HSA-442725;R-HSA-167429;R-HSA-111881;R-HSA-170666;R-HSA-111883;R-HSA-167433;R-HSA-392206;R-HSA-170671;R-HSA-112271;R-HSA-170674;R-HSA-167408;R-HSA-167419;R-HSA-111898;R-HSA-170686;R-HSA-9617583
R-HSA-1296059	G protein gated Potassium channels	2	31	0.00217224	0.210565	0.668153	3	3	0.000220962	9606	Homo sapiens	Gng8;Dact3		R-HSA-1013020;R-HSA-1013013;R-HSA-1013012
R-HSA-997272	Inhibition of voltage gated Ca2+ channels via Gbeta/gamma subunits	2	31	0.00217224	0.210565	0.668153	3	3	0.000220962	9606	Homo sapiens	Gng8;Dact3		R-HSA-1013020;R-HSA-1013013;R-HSA-1013012
R-HSA-1296041	Activation of G protein gated Potassium channels	2	31	0.00217224	0.210565	0.668153	3	3	0.000220962	9606	Homo sapiens	Gng8;Dact3		R-HSA-1013020;R-HSA-1013013;R-HSA-1013012
R-HSA-1482801	Acyl chain remodelling of PS	2	31	0.00217224	0.210565	0.668153	3	8	0.000589232	9606	Homo sapiens	Hes1;Pla2g4a		R-HSA-8867876;R-HSA-1482771;R-HSA-1482897
R-HSA-111995	phospho-PLA2 pathway	1	9	0.00063065	0.21958	0.668153	3	3	0.000220962	9606	Homo sapiens	Pla2g4a		R-HSA-111881;R-HSA-111883;R-HSA-111898
R-HSA-9645135	STAT5 Activation	1	9	0.00063065	0.21958	0.668153	3	3	0.000220962	9606	Homo sapiens	Flt3l		R-HSA-9645137;R-HSA-9645126;R-HSA-9645134
R-HSA-9027283	Erythropoietin activates STAT5	1	9	0.00063065	0.21958	0.668153	3	3	0.000220962	9606	Homo sapiens	Irs2		R-HSA-9012651;R-HSA-9012650;R-HSA-9012654
R-HSA-113507	E2F-enabled inhibition of pre-replication complex formation	1	9	0.00063065	0.21958	0.668153	1	1	7.3654e-05	9606	Homo sapiens	Orc6		R-HSA-113638
R-HSA-9662001	Defective factor VIII causes hemophilia A	1	9	0.00063065	0.21958	0.668153	1	8	0.000589232	9606	Homo sapiens	Tpst1		R-HSA-9668148
R-HSA-159763	Transport of gamma-carboxylated protein precursors from the endoplasmic reticulum to the Golgi apparatus	1	9	0.00063065	0.21958	0.668153	1	9	0.000662886	9606	Homo sapiens	Gas6		R-HSA-163809
R-HSA-5357769	Caspase activation via extrinsic apoptotic signalling pathway	2	32	0.00224231	0.220607	0.668153	5	17	0.00125212	9606	Homo sapiens	Maged1;Tnfsf10		R-HSA-139952;R-HSA-141156;R-HSA-3465448;R-HSA-3371359;R-HSA-374699
R-HSA-202433	Generation of second messenger molecules	3	59	0.00413426	0.222858	0.668153	3	17	0.00125212	9606	Homo sapiens	H2-Eb1;H2-Aa;H2-Ab1		R-HSA-202245;R-HSA-202248;R-HSA-202216
R-HSA-76005	Response to elevated platelet cytosolic Ca2+	6	148	0.0103707	0.226036	0.668153	3	14	0.00103116	9606	Homo sapiens	Clec3b;Apoh;Fam3c;Sod3;Lgals3bp;Gas6		R-HSA-482772;R-HSA-481009;R-HSA-481007
R-HSA-2132295	MHC class II antigen presentation	6	149	0.0104408	0.230446	0.668153	25	26	0.001915	9606	Homo sapiens	Cd74;H2-Eb1;Tuba1b;Ifi30;H2-Aa;H2-Ab1		R-HSA-2130336;R-HSA-8951498;R-HSA-8951500;R-HSA-2130725;R-HSA-2130731;R-HSA-2130349;R-HSA-2130478;R-HSA-2213235;R-HSA-2213236;R-HSA-2213239;R-HSA-2130486;R-HSA-2213241;R-HSA-2213240;R-HSA-8856157;R-HSA-2213243;R-HSA-2130619;R-HSA-2213244;R-HSA-2213246;R-HSA-2213248;R-HSA-2130500;R-HSA-2130504;R-HSA-2130378;R-HSA-2130640;R-HSA-2130641;R-HSA-2130393
R-HSA-4641262	Disassembly of the destruction complex and recruitment of AXIN to the membrane	2	33	0.00231238	0.230688	0.668153	5	7	0.000515578	9606	Homo sapiens	Fzd2;Peg12		R-HSA-201685;R-HSA-5323526;R-HSA-201691;R-HSA-1504186;R-HSA-201677
R-HSA-112412	SOS-mediated signalling	1	10	0.000700722	0.240793	0.668153	2	2	0.000147308	9606	Homo sapiens	Irs2		R-HSA-74736;R-HSA-109817
R-HSA-162791	Attachment of GPI anchor to uPAR	1	10	0.000700722	0.240793	0.668153	1	2	0.000147308	9606	Homo sapiens	Pigt		R-HSA-162836
R-HSA-1369007	Mitochondrial ABC transporters	1	10	0.000700722	0.240793	0.668153	1	2	0.000147308	9606	Homo sapiens	Abcb8		R-HSA-382560
R-HSA-112313	Neurotransmitter uptake and metabolism In glial cells	1	10	0.000700722	0.240793	0.668153	1	3	0.000220962	9606	Homo sapiens	Sat1		R-HSA-212614
R-HSA-210455	Astrocytic Glutamate-Glutamine Uptake And Metabolism	1	10	0.000700722	0.240793	0.668153	1	3	0.000220962	9606	Homo sapiens	Sat1		R-HSA-212614
R-HSA-209822	Glycoprotein hormones	1	10	0.000700722	0.240793	0.668153	1	4	0.000294616	9606	Homo sapiens	Inha		R-HSA-378975
R-HSA-159782	Removal of aminoterminal propeptides from gamma-carboxylated proteins	1	10	0.000700722	0.240793	0.668153	1	9	0.000662886	9606	Homo sapiens	Gas6		R-HSA-163843
R-HSA-451326	Activation of kainate receptors upon glutamate binding	2	34	0.00238245	0.240797	0.668153	1	6	0.000441924	9606	Homo sapiens	Gng8;Dact3		R-HSA-500717
R-HSA-380994	ATF4 activates genes in response to endoplasmic reticulum stress	2	34	0.00238245	0.240797	0.668153	1	7	0.000515578	9606	Homo sapiens	Atf3		R-HSA-1791173
R-HSA-9006335	Signaling by Erythropoietin	2	35	0.00245253	0.250926	0.668153	24	24	0.0017677	9606	Homo sapiens	Irs2;Pik3cd		R-HSA-9027273;R-HSA-9027272;R-HSA-9027275;R-HSA-9012651;R-HSA-9027274;R-HSA-9012650;R-HSA-9027373;R-HSA-9012654;R-HSA-9027425;R-HSA-9029155;R-HSA-9029158;R-HSA-9021627;R-HSA-9029149;R-HSA-9006332;R-HSA-9029151;R-HSA-9032478;R-HSA-9029150;R-HSA-9027281;R-HSA-9012657;R-HSA-9027280;R-HSA-9024723;R-HSA-9006323;R-HSA-9006325;R-HSA-9024726
R-HSA-420092	Glucagon-type ligand receptors	2	35	0.00245253	0.250926	0.668153	1	8	0.000589232	9606	Homo sapiens	Gng8;Dact3		R-HSA-381612
R-HSA-418597	G alpha (z) signalling events	3	63	0.00441455	0.251865	0.668153	5	13	0.000957502	9606	Homo sapiens	Gnai2;Gng8;Dact3		R-HSA-392129;R-HSA-749453;R-HSA-750988;R-HSA-751024;R-HSA-749446
R-HSA-2219528	PI3K/AKT Signaling in Cancer	5	124	0.00868895	0.258086	0.668153	2	21	0.00154673	9606	Homo sapiens	Akt3;Flt3l;Irs2;Pik3cd;Esr2		R-HSA-2400009;R-HSA-2400010
R-HSA-456926	Thrombin signalling through proteinase activated receptors (PARs)	2	36	0.0025226	0.261066	0.668153	6	15	0.00110481	9606	Homo sapiens	Gng8;Dact3		R-HSA-396996;R-HSA-397891;R-HSA-114552;R-HSA-396941;R-HSA-397835;R-HSA-114558
R-HSA-549127	Organic cation transport	2	36	0.0025226	0.261066	0.668153	2	9	0.000662886	9606	Homo sapiens	Slc22a4		R-HSA-549241;R-HSA-549297
R-HSA-5686938	Regulation of TLR by endogenous ligand	2	36	0.0025226	0.261066	0.668153	1	12	0.000883848	9606	Homo sapiens	S100a9;S100a8		R-HSA-5432849
R-HSA-3371378	Regulation by c-FLIP	1	11	0.000770794	0.26143	0.668153	2	4	0.000294616	9606	Homo sapiens	Tnfsf10		R-HSA-3465448;R-HSA-3371359
R-HSA-68689	CDC6 association with the ORC:origin complex	1	11	0.000770794	0.26143	0.668153	1	2	0.000147308	9606	Homo sapiens	Orc6		R-HSA-68688
R-HSA-69416	Dimerization of procaspase-8	1	11	0.000770794	0.26143	0.668153	1	3	0.000220962	9606	Homo sapiens	Tnfsf10		R-HSA-141156
R-HSA-8866904	Negative regulation of activity of TFAP2 (AP-2) family transcription factors	1	11	0.000770794	0.26143	0.668153	1	6	0.000441924	9606	Homo sapiens	Kctd15		R-HSA-8864361
R-HSA-2219530	Constitutive Signaling by Aberrant PI3K in Cancer	4	96	0.00672693	0.273269	0.668153	1	2	0.000147308	9606	Homo sapiens	Flt3l;Irs2;Pik3cd;Esr2		R-HSA-2400009
R-HSA-1296065	Inwardly rectifying K+ channels	2	38	0.00266274	0.281349	0.668153	3	7	0.000515578	9606	Homo sapiens	Gng8;Dact3		R-HSA-1013020;R-HSA-1013013;R-HSA-1013012
R-HSA-186712	Regulation of beta-cell development	3	67	0.00469484	0.281377	0.668153	3	26	0.001915	9606	Homo sapiens	Akt3;Hes1		R-HSA-1980047;R-HSA-210836;R-HSA-211164
R-HSA-198693	AKT phosphorylates targets in the nucleus	1	12	0.000840866	0.281507	0.668153	4	4	0.000294616	9606	Homo sapiens	Akt3		R-HSA-199299;R-HSA-199298;R-HSA-199863;R-HSA-199839
R-HSA-2855086	Ficolins bind to repetitive carbohydrate structures on the target cell surface	1	12	0.000840866	0.281507	0.668153	3	3	0.000220962	9606	Homo sapiens	Efcab7		R-HSA-2855054;R-HSA-2855077;R-HSA-2855125
R-HSA-433692	Proton-coupled monocarboxylate transport	1	12	0.000840866	0.281507	0.668153	1	2	0.000147308	9606	Homo sapiens	Slc16a3		R-HSA-433698
R-HSA-3323169	Defects in biotin (Btn) metabolism	1	12	0.000840866	0.281507	0.668153	2	6	0.000441924	9606	Homo sapiens	Btd		R-HSA-3325540;R-HSA-4225086
R-HSA-8853383	Lysosomal oligosaccharide catabolism	1	12	0.000840866	0.281507	0.668153	1	5	0.00036827	9606	Homo sapiens	Man2b2		R-HSA-6799581
R-HSA-418889	Caspase activation via Dependence Receptors in the absence of ligand	1	12	0.000840866	0.281507	0.668153	1	8	0.000589232	9606	Homo sapiens	Maged1		R-HSA-374699
R-HSA-977443	GABA receptor activation	3	68	0.00476491	0.288808	0.668153	8	12	0.000883848	9606	Homo sapiens	Gnai2;Gng8;Dact3		R-HSA-170674;R-HSA-1013020;R-HSA-170666;R-HSA-1013013;R-HSA-1013012;R-HSA-392206;R-HSA-170686;R-HSA-170671
R-HSA-2644602	Signaling by NOTCH1 PEST Domain Mutants in Cancer	3	68	0.00476491	0.288808	0.668153	3	21	0.00154673	9606	Homo sapiens	Mib2;Hes1		R-HSA-2220979;R-HSA-2769007;R-HSA-4396392
R-HSA-2894858	Signaling by NOTCH1 HD+PEST Domain Mutants in Cancer	3	68	0.00476491	0.288808	0.668153	3	21	0.00154673	9606	Homo sapiens	Mib2;Hes1		R-HSA-2900765;R-HSA-2220979;R-HSA-4396392
R-HSA-2644606	Constitutive Signaling by NOTCH1 PEST Domain Mutants	3	68	0.00476491	0.288808	0.668153	3	21	0.00154673	9606	Homo sapiens	Mib2;Hes1		R-HSA-2220979;R-HSA-2769007;R-HSA-4396392
R-HSA-2894862	Constitutive Signaling by NOTCH1 HD+PEST Domain Mutants	3	68	0.00476491	0.288808	0.668153	3	21	0.00154673	9606	Homo sapiens	Mib2;Hes1		R-HSA-2900765;R-HSA-2220979;R-HSA-4396392
R-HSA-2644603	Signaling by NOTCH1 in Cancer	3	68	0.00476491	0.288808	0.668153	5	39	0.0028725	9606	Homo sapiens	Mib2;Hes1		R-HSA-2900765;R-HSA-2220979;R-HSA-2769007;R-HSA-2737728;R-HSA-4396392
R-HSA-9037629	Lewis blood group biosynthesis	2	39	0.00273281	0.291476	0.668153	5	13	0.000957502	9606	Homo sapiens	Fut4		R-HSA-9605682;R-HSA-9603986;R-HSA-9603984;R-HSA-9605609;R-HSA-9605644
R-HSA-6804758	Regulation of TP53 Activity through Acetylation	2	39	0.00273281	0.291476	0.668153	3	14	0.00103116	9606	Homo sapiens	Chd3;Akt3		R-HSA-6805620;R-HSA-6805650;R-HSA-6805640
R-HSA-445717	Aquaporin-mediated transport	3	69	0.00483498	0.296253	0.668153	8	25	0.00184135	9606	Homo sapiens	Aqp7;Gng8;Dact3		R-HSA-432195;R-HSA-422320;R-HSA-507871;R-HSA-507870;R-HSA-507869;R-HSA-432188;R-HSA-507868;R-HSA-432074
R-HSA-3299685	Detoxification of Reactive Oxygen Species	3	69	0.00483498	0.296253	0.668153	9	34	0.00250424	9606	Homo sapiens	Ncf1;Sod3		R-HSA-3299682;R-HSA-8951723;R-HSA-3697838;R-HSA-3780958;R-HSA-3780979;R-HSA-1222376;R-HSA-3299753;R-HSA-3697860;R-HSA-4837364
R-HSA-9027277	Erythropoietin activates Phospholipase C gamma (PLCG)	1	13	0.000910938	0.30104	0.668153	3	3	0.000220962	9606	Homo sapiens	Irs2		R-HSA-9027373;R-HSA-9032478;R-HSA-9027425
R-HSA-5140745	WNT5A-dependent internalization of FZD2, FZD5 and ROR2	1	13	0.000910938	0.30104	0.668153	2	2	0.000147308	9606	Homo sapiens	Fzd2		R-HSA-5140747;R-HSA-5140741
R-HSA-198203	PI3K/AKT activation	1	13	0.000910938	0.30104	0.668153	4	5	0.00036827	9606	Homo sapiens	Irs2		R-HSA-198211;R-HSA-198295;R-HSA-198315;R-HSA-198266
R-HSA-74749	Signal attenuation	1	13	0.000910938	0.30104	0.668153	3	7	0.000515578	9606	Homo sapiens	Irs2		R-HSA-74747;R-HSA-5686315;R-HSA-109823
R-HSA-3215018	Processing and activation of SUMO	1	13	0.000910938	0.30104	0.668153	3	9	0.000662886	9606	Homo sapiens	Senp5		R-HSA-2990840;R-HSA-2990842;R-HSA-2993763
R-HSA-426048	Arachidonate production from DAG	1	13	0.000910938	0.30104	0.668153	1	3	0.000220962	9606	Homo sapiens	Mgl2;Mgll		R-HSA-426043
R-HSA-1236973	Cross-presentation of particulate exogenous antigens (phagosomes)	1	13	0.000910938	0.30104	0.668153	1	3	0.000220962	9606	Homo sapiens	Ncf1		R-HSA-1236967
R-HSA-209952	Peptide hormone biosynthesis	1	13	0.000910938	0.30104	0.668153	1	5	0.00036827	9606	Homo sapiens	Inha		R-HSA-378975
R-HSA-111932	CaMK IV-mediated phosphorylation of CREB	1	13	0.000910938	0.30104	0.668153	2	13	0.000957502	9606	Homo sapiens	Camk2a		R-HSA-442725;R-HSA-9617583
R-HSA-2586552	Signaling by Leptin	1	13	0.000910938	0.30104	0.668153	2	19	0.00139943	9606	Homo sapiens	Irs2		R-HSA-2671873;R-HSA-2671862
R-HSA-9020956	Interleukin-27 signaling	1	13	0.000910938	0.30104	0.668153	2	20	0.00147308	9606	Homo sapiens	Crlf1		R-HSA-8950504;R-HSA-8950731
R-HSA-186797	Signaling by PDGF	3	70	0.00490505	0.30371	0.668153	2	31	0.00228327	9606	Homo sapiens	Col6a1;Col6a2;Bcar1		R-HSA-382052;R-HSA-382054
R-HSA-6814122	Cooperation of PDCL (PhLP1) and TRiC/CCT in G-protein beta folding	2	41	0.00287296	0.311668	0.668153	2	11	0.000810194	9606	Homo sapiens	Gng8;Dact3		R-HSA-6814418;R-HSA-8850560
R-HSA-156584	Cytosolic sulfonation of small molecules	3	72	0.0050452	0.318646	0.668153	4	24	0.0017677	9606	Homo sapiens	Tpst1;Sat1;Papss1		R-HSA-427555;R-HSA-174389;R-HSA-174392;R-HSA-8954262
R-HSA-933543	NF-kB activation through FADD/RIP-1 pathway mediated by caspase-8 and -10	1	14	0.00098101	0.320043	0.668153	5	5	0.00036827	9606	Homo sapiens	Rnf135		R-HSA-933532;R-HSA-168934;R-HSA-933526;R-HSA-933539;R-HSA-933523
R-HSA-5218900	CASP8 activity is inhibited	1	14	0.00098101	0.320043	0.668153	2	3	0.000220962	9606	Homo sapiens	Tnfsf10		R-HSA-3465429;R-HSA-5675456
R-HSA-9664535	LTC4-CYSLTR mediated IL4 production	1	14	0.00098101	0.320043	0.668153	1	3	0.000220962	9606	Homo sapiens	Dpep2		R-HSA-266012
R-HSA-9614399	Regulation of localization of FOXO transcription factors	1	14	0.00098101	0.320043	0.668153	1	5	0.00036827	9606	Homo sapiens	Akt3		R-HSA-199299
R-HSA-8941332	RUNX2 regulates genes involved in cell migration	1	14	0.00098101	0.320043	0.668153	1	7	0.000515578	9606	Homo sapiens	Akt3		R-HSA-8939963
R-HSA-391908	Prostanoid ligand receptors	1	14	0.00098101	0.320043	0.668153	1	8	0.000589232	9606	Homo sapiens	Gpr1		R-HSA-391934
R-HSA-163560	Triglyceride catabolism	2	42	0.00294303	0.321721	0.668153	9	17	0.00125212	9606	Homo sapiens	Mgl2;Lipe;Mgll		R-HSA-163554;R-HSA-163602;R-HSA-163489;R-HSA-163402;R-HSA-163595;R-HSA-163432;R-HSA-163416;R-HSA-163551;R-HSA-163549
R-HSA-5260271	Diseases of Immune System	2	42	0.00294303	0.321721	0.668153	4	15	0.00110481	9606	Homo sapiens	S100a9;S100a8		R-HSA-5602353;R-HSA-5602672;R-HSA-5602383;R-HSA-5602606
R-HSA-5602358	Diseases associated with the TLR signaling cascade	2	42	0.00294303	0.321721	0.668153	4	15	0.00110481	9606	Homo sapiens	S100a9;S100a8		R-HSA-5602353;R-HSA-5602672;R-HSA-5602383;R-HSA-5602606
R-HSA-381042	PERK regulates gene expression	2	42	0.00294303	0.321721	0.668153	1	11	0.000810194	9606	Homo sapiens	Atf3		R-HSA-1791173
R-HSA-1474290	Collagen formation	4	104	0.00728751	0.322216	0.668153	25	77	0.00567136	9606	Homo sapiens	Col6a1;Col6a2;Pcolce;Col8a1		R-HSA-8948232;R-HSA-8948234;R-HSA-2002460;R-HSA-8948224;R-HSA-8948226;R-HSA-8948228;R-HSA-8948230;R-HSA-8948231;R-HSA-8944218;R-HSA-1981128;R-HSA-2002440;R-HSA-1980233;R-HSA-1981120;R-HSA-1650808;R-HSA-2022141;R-HSA-1614460;R-HSA-1614461;R-HSA-2022073;R-HSA-2089971;R-HSA-1981104;R-HSA-8948219;R-HSA-2213207;R-HSA-8948222;R-HSA-1981157;R-HSA-8944247
R-HSA-112040	G-protein mediated events	3	73	0.00511527	0.326118	0.668153	10	41	0.00301981	9606	Homo sapiens	Camk2a;Gnai2;Pla2g4a		R-HSA-170674;R-HSA-442725;R-HSA-111881;R-HSA-170666;R-HSA-111883;R-HSA-111898;R-HSA-392206;R-HSA-170686;R-HSA-170671;R-HSA-9617583
R-HSA-199418	Negative regulation of the PI3K/AKT network	5	137	0.00959989	0.32665	0.668153	3	10	0.00073654	9606	Homo sapiens	Akt3;Flt3l;Irs2;Pik3cd;Esr2		R-HSA-199443;R-HSA-2316434;R-HSA-199425
R-HSA-432720	Lysosome Vesicle Biogenesis	2	43	0.0030131	0.331737	0.668153	6	8	0.000589232	9606	Homo sapiens	Ctsz;Ap4m1		R-HSA-5229132;R-HSA-432706;R-HSA-432707;R-HSA-432688;R-HSA-5229111;R-HSA-432712
R-HSA-166662	Lectin pathway of complement activation	1	15	0.00105108	0.338531	0.668153	6	6	0.000441924	9606	Homo sapiens	Efcab7		R-HSA-166721;R-HSA-166726;R-HSA-2855054;R-HSA-8852509;R-HSA-2855077;R-HSA-2855125
R-HSA-3772470	Negative regulation of TCF-dependent signaling by WNT ligand antagonists	1	15	0.00105108	0.338531	0.668153	1	5	0.00036827	9606	Homo sapiens	Sfrp2		R-HSA-3772441
R-HSA-159740	Gamma-carboxylation of protein precursors	1	15	0.00105108	0.338531	0.668153	1	9	0.000662886	9606	Homo sapiens	Gas6		R-HSA-163810
R-HSA-5689896	Ovarian tumor domain proteases	2	44	0.00308318	0.341711	0.668153	2	14	0.00103116	9606	Homo sapiens	Rnf135;Yod1		R-HSA-936381;R-HSA-6781953
R-HSA-419037	NCAM1 interactions	2	44	0.00308318	0.341711	0.668153	1	10	0.00073654	9606	Homo sapiens	Col6a1;Col6a2		R-HSA-375151
R-HSA-198323	AKT phosphorylates targets in the cytosol	1	16	0.00112115	0.356518	0.668153	9	9	0.000662886	9606	Homo sapiens	Akt3		R-HSA-198611;R-HSA-198371;R-HSA-198609;R-HSA-198599;R-HSA-198613;R-HSA-198347;R-HSA-200143;R-HSA-8948757;R-HSA-198621
R-HSA-879415	Advanced glycosylation endproduct receptor signaling	1	16	0.00112115	0.356518	0.668153	2	4	0.000294616	9606	Homo sapiens	Bcam		R-HSA-879411;R-HSA-879362
R-HSA-8951936	RUNX3 regulates p14-ARF	1	16	0.00112115	0.356518	0.668153	3	8	0.000589232	9606	Homo sapiens	Ccnd1		R-HSA-8952058;R-HSA-8952062;R-HSA-8952069
R-HSA-9640463	Wax biosynthesis	1	16	0.00112115	0.356518	0.668153	2	6	0.000441924	9606	Homo sapiens	Awat2		R-HSA-8848582;R-HSA-8848585
R-HSA-351200	Interconversion of polyamines	1	16	0.00112115	0.356518	0.668153	2	7	0.000515578	9606	Homo sapiens	Sat1		R-HSA-351207;R-HSA-351208
R-HSA-2691232	Constitutive Signaling by NOTCH1 HD Domain Mutants	1	16	0.00112115	0.356518	0.668153	1	6	0.000441924	9606	Homo sapiens	Mib2		R-HSA-2737728
R-HSA-2691230	Signaling by NOTCH1 HD Domain Mutants in Cancer	1	16	0.00112115	0.356518	0.668153	1	6	0.000441924	9606	Homo sapiens	Mib2		R-HSA-2737728
R-HSA-1358803	Downregulation of ERBB2:ERBB3 signaling	1	16	0.00112115	0.356518	0.668153	1	8	0.000589232	9606	Homo sapiens	Akt3		R-HSA-1358791
R-HSA-159854	Gamma-carboxylation, transport, and amino-terminal cleavage of proteins	1	16	0.00112115	0.356518	0.668153	3	27	0.00198866	9606	Homo sapiens	Gas6		R-HSA-163810;R-HSA-163843;R-HSA-163809
R-HSA-9035034	RHOF GTPase cycle	2	46	0.00322332	0.361512	0.668153	2	3	0.000220962	9606	Homo sapiens	Syde1;Add3		R-HSA-9693282;R-HSA-9693125
R-HSA-9646399	Aggrephagy	2	47	0.00329339	0.371329	0.668153	13	15	0.00110481	9606	Homo sapiens	Tuba1b;Arl13b		R-HSA-9640114;R-HSA-9639698;R-HSA-9646354;R-HSA-9646679;R-HSA-9641111;R-HSA-9646390;R-HSA-9641109;R-HSA-9646685;R-HSA-9641127;R-HSA-9646347;R-HSA-9641096;R-HSA-9646383;R-HSA-9646348
R-HSA-1251985	Nuclear signaling by ERBB4	2	47	0.00329339	0.371329	0.668153	2	34	0.00250424	9606	Homo sapiens	Cxcl12		R-HSA-8954207;R-HSA-8954199
R-HSA-9661069	Defective binding of RB1 mutants to E2F1,(E2F2, E2F3)	1	17	0.00119123	0.374016	0.668153	1	1	7.3654e-05	9606	Homo sapiens	Ccnd1		R-HSA-9659782
R-HSA-9659787	Aberrant regulation of mitotic G1/S transition in cancer due to RB1 defects	1	17	0.00119123	0.374016	0.668153	1	2	0.000147308	9606	Homo sapiens	Ccnd1		R-HSA-9659782
R-HSA-5676594	TNF receptor superfamily (TNFSF) members mediating non-canonical NF-kB pathway	1	17	0.00119123	0.374016	0.668153	5	12	0.000883848	9606	Homo sapiens	Map3k14		R-HSA-5676598;R-HSA-5676596;R-HSA-5676597;R-HSA-5676595;R-HSA-5676593
R-HSA-6788467	IL-6-type cytokine receptor ligand interactions	1	17	0.00119123	0.374016	0.668153	4	14	0.00103116	9606	Homo sapiens	Crlf1		R-HSA-6783670;R-HSA-6783556;R-HSA-5696490;R-HSA-6783530
R-HSA-6804759	Regulation of TP53 Activity through Association with Co-factors	1	17	0.00119123	0.374016	0.668153	1	11	0.000810194	9606	Homo sapiens	Akt3		R-HSA-6805785
R-HSA-199992	trans-Golgi Network Vesicle Budding	3	80	0.00560577	0.378262	0.668153	10	19	0.00139943	9606	Homo sapiens	Ctsz;Pik3c2a;Ap4m1		R-HSA-421831;R-HSA-5229132;R-HSA-432706;R-HSA-432707;R-HSA-432688;R-HSA-5229111;R-HSA-421836;R-HSA-421835;R-HSA-432712;R-HSA-421833
R-HSA-9607240	FLT3 Signaling	2	48	0.00336346	0.381086	0.668153	39	43	0.00316712	9606	Homo sapiens	Akt3;Flt3l		R-HSA-6786789;R-HSA-9645137;R-HSA-9706323;R-HSA-9695828;R-HSA-9706328;R-HSA-9606622;R-HSA-9604767;R-HSA-9706330;R-HSA-9706308;R-HSA-9604738;R-HSA-9606784;R-HSA-9706304;R-HSA-9645126;R-HSA-8854736;R-HSA-9607301;R-HSA-9605259;R-HSA-9607304;R-HSA-9706319;R-HSA-9706312;R-HSA-9645134;R-HSA-9706315;R-HSA-9706293;R-HSA-9706354;R-HSA-9609274;R-HSA-9706364;R-HSA-9698170;R-HSA-9607224;R-HSA-9706298;R-HSA-9…
R-HSA-111996	Ca-dependent events	2	48	0.00336346	0.381086	0.668153	5	27	0.00198866	9606	Homo sapiens	Camk2a;Pla2g4a		R-HSA-442725;R-HSA-111881;R-HSA-111883;R-HSA-111898;R-HSA-9617583
R-HSA-549132	Organic cation/anion/zwitterion transport	2	48	0.00336346	0.381086	0.668153	2	12	0.000883848	9606	Homo sapiens	Slc22a4		R-HSA-549241;R-HSA-549297
R-HSA-8853884	Transcriptional Regulation by VENTX	2	48	0.00336346	0.381086	0.668153	2	13	0.000957502	9606	Homo sapiens	Ccnd1		R-HSA-8853956;R-HSA-8853965
R-HSA-877300	Interferon gamma signaling	8	250	0.017518	0.383939	0.668153	3	16	0.00117846	9606	Homo sapiens	H2-Eb1;Camk2a;Trim46;Ifi30;H2-Aa;H2-Ab1		R-HSA-1031716;R-HSA-909552;R-HSA-1031713
R-HSA-6811438	Intra-Golgi traffic	2	49	0.00343354	0.390779	0.668153	5	10	0.00073654	9606	Homo sapiens	Cog7;Sat1		R-HSA-8849748;R-HSA-8847635;R-HSA-8847887;R-HSA-6811433;R-HSA-8847544
R-HSA-9609736	Assembly and cell surface presentation of NMDA receptors	2	49	0.00343354	0.390779	0.668153	3	23	0.00169404	9606	Homo sapiens	Tuba1b;Camk2a		R-HSA-9610627;R-HSA-9610408;R-HSA-9611368
R-HSA-5423646	Aflatoxin activation and detoxification	2	49	0.00343354	0.390779	0.668153	2	18	0.00132577	9606	Homo sapiens	Acy3;Dpep2		R-HSA-5433067;R-HSA-9638046
R-HSA-5684264	MAP3K8 (TPL2)-dependent MAPK1/3 activation	1	18	0.0012613	0.39104	0.668153	8	8	0.000589232	9606	Homo sapiens	Map3k8		R-HSA-5684261;R-HSA-451634;R-HSA-5684275;R-HSA-451649;R-HSA-5684273;R-HSA-5684250;R-HSA-5684267;R-HSA-5684248
R-HSA-399956	CRMPs in Sema3A signaling	1	18	0.0012613	0.39104	0.668153	3	5	0.00036827	9606	Homo sapiens	Dpysl3		R-HSA-399951;R-HSA-399947;R-HSA-399944
R-HSA-918233	TRAF3-dependent IRF activation pathway	1	18	0.0012613	0.39104	0.668153	6	11	0.000810194	9606	Homo sapiens	Rnf135		R-HSA-9705137;R-HSA-918232;R-HSA-918229;R-HSA-9705320;R-HSA-918227;R-HSA-918225
R-HSA-1855191	Synthesis of IPs in the nucleus	1	18	0.0012613	0.39104	0.668153	5	10	0.00073654	9606	Homo sapiens	Ip6k2		R-HSA-1855181;R-HSA-1855230;R-HSA-1855224;R-HSA-1855157;R-HSA-1855207
R-HSA-1483115	Hydrolysis of LPC	1	18	0.0012613	0.39104	0.668153	2	6	0.000441924	9606	Homo sapiens	Pla2g4a		R-HSA-1482612;R-HSA-1482685
R-HSA-9634600	Regulation of glycolysis by fructose 2,6-bisphosphate metabolism	1	18	0.0012613	0.39104	0.668153	1	4	0.000294616	9606	Homo sapiens	44443		R-HSA-71802
R-HSA-1482798	Acyl chain remodeling of CL	1	18	0.0012613	0.39104	0.668153	1	12	0.000883848	9606	Homo sapiens	Pla2g4a		R-HSA-1482759
R-HSA-948021	Transport to the Golgi and subsequent modification	7	219	0.0153458	0.398696	0.668153	20	60	0.00441924	9606	Homo sapiens	St8sia6;Tuba1b;Ctsz;Kctd15;Arfgap3;Cog7;Fut4		R-HSA-6807877;R-HSA-6807875;R-HSA-5694418;R-HSA-203973;R-HSA-5694417;R-HSA-6809006;R-HSA-5694527;R-HSA-5694428;R-HSA-204008;R-HSA-6809003;R-HSA-5694522;R-HSA-5694439;R-HSA-5693925;R-HSA-6809011;R-HSA-6809010;R-HSA-6786034;R-HSA-5694446;R-HSA-1022133;R-HSA-5694441;R-HSA-5694409
R-HSA-381676	Glucagon-like Peptide-1 (GLP1) regulates insulin secretion	2	50	0.00350361	0.400402	0.668153	3	11	0.000810194	9606	Homo sapiens	Gng8;Dact3		R-HSA-422320;R-HSA-381612;R-HSA-381706
R-HSA-9027284	Erythropoietin activates RAS	1	19	0.00133137	0.407603	0.668153	8	8	0.000589232	9606	Homo sapiens	Irs2		R-HSA-9027274;R-HSA-9029149;R-HSA-9029151;R-HSA-9029150;R-HSA-9029155;R-HSA-9024723;R-HSA-9029158;R-HSA-9024726
R-HSA-170670	Adenylate cyclase inhibitory pathway	1	19	0.00133137	0.407603	0.668153	5	5	0.00036827	9606	Homo sapiens	Gnai2		R-HSA-170674;R-HSA-170666;R-HSA-392206;R-HSA-170686;R-HSA-170671
R-HSA-196299	Beta-catenin phosphorylation cascade	1	19	0.00133137	0.407603	0.668153	3	4	0.000294616	9606	Homo sapiens	Peg12		R-HSA-195283;R-HSA-195287;R-HSA-195300
R-HSA-416700	Other semaphorin interactions	1	19	0.00133137	0.407603	0.668153	2	9	0.000662886	9606	Homo sapiens	Plxnd1		R-HSA-416690;R-HSA-416683
R-HSA-419408	Lysosphingolipid and LPA receptors	1	19	0.00133137	0.407603	0.668153	1	5	0.00036827	9606	Homo sapiens	S1pr3		R-HSA-419428
R-HSA-111447	Activation of BAD and translocation to mitochondria	1	19	0.00133137	0.407603	0.668153	1	5	0.00036827	9606	Homo sapiens	Akt3		R-HSA-198347
R-HSA-427601	Multifunctional anion exchangers	1	19	0.00133137	0.407603	0.668153	1	6	0.000441924	9606	Homo sapiens	Sat1		R-HSA-427555
R-HSA-975577	N-Glycan antennae elongation	1	19	0.00133137	0.407603	0.668153	1	6	0.000441924	9606	Homo sapiens	St8sia6		R-HSA-1022133
R-HSA-196780	Biotin transport and metabolism	1	19	0.00133137	0.407603	0.668153	2	13	0.000957502	9606	Homo sapiens	Btd		R-HSA-3076905;R-HSA-4167509
R-HSA-1980143	Signaling by NOTCH1	3	84	0.00588606	0.407709	0.668153	4	39	0.0028725	9606	Homo sapiens	Mib2;Hes1		R-HSA-1980047;R-HSA-1980074;R-HSA-4396347;R-HSA-1912359
R-HSA-166058	MyD88:MAL(TIRAP) cascade initiated on plasma membrane	4	118	0.00826852	0.408717	0.668153	25	64	0.00471385	9606	Homo sapiens	Bcam;Map3k8;S100a9;S100a8		R-HSA-166082;R-HSA-2201316;R-HSA-451649;R-HSA-166091;R-HSA-2201322;R-HSA-5684250;R-HSA-166286;R-HSA-5684248;R-HSA-166284;R-HSA-2559414;R-HSA-2262775;R-HSA-166362;R-HSA-166363;R-HSA-2262777;R-HSA-168166;R-HSA-5684275;R-HSA-166119;R-HSA-5684273;R-HSA-937059;R-HSA-937022;R-HSA-5684261;R-HSA-451634;R-HSA-937079;R-HSA-166072;R-HSA-5684267
R-HSA-168188	Toll Like Receptor TLR6:TLR2 Cascade	4	118	0.00826852	0.408717	0.668153	25	66	0.00486116	9606	Homo sapiens	Bcam;Map3k8;S100a9;S100a8		R-HSA-166082;R-HSA-2201316;R-HSA-451649;R-HSA-166091;R-HSA-2201322;R-HSA-5684250;R-HSA-166286;R-HSA-5684248;R-HSA-166284;R-HSA-2559414;R-HSA-2262775;R-HSA-166362;R-HSA-166363;R-HSA-2262777;R-HSA-168166;R-HSA-5684275;R-HSA-166119;R-HSA-5684273;R-HSA-937059;R-HSA-937022;R-HSA-5684261;R-HSA-451634;R-HSA-937079;R-HSA-166072;R-HSA-5684267
R-HSA-8878159	Transcriptional regulation by RUNX3	4	118	0.00826852	0.408717	0.668153	9	47	0.00346174	9606	Homo sapiens	Ccnd1;Hes1		R-HSA-1980047;R-HSA-8952058;R-HSA-8878243;R-HSA-8952062;R-HSA-4396347;R-HSA-8878237;R-HSA-8951442;R-HSA-8951443;R-HSA-8952069
R-HSA-9033658	Blood group systems biosynthesis	2	52	0.00364375	0.419431	0.668153	5	22	0.00162039	9606	Homo sapiens	Fut4		R-HSA-9605682;R-HSA-9603986;R-HSA-9603984;R-HSA-9605609;R-HSA-9605644
R-HSA-8864260	Transcriptional regulation by the AP-2 (TFAP2) family of transcription factors	2	52	0.00364375	0.419431	0.668153	4	44	0.00324077	9606	Homo sapiens	Kctd15;Jarid2		R-HSA-8865265;R-HSA-8865280;R-HSA-8864361;R-HSA-8865256
R-HSA-216083	Integrin cell surface interactions	3	86	0.00602621	0.422279	0.668153	2	55	0.00405097	9606	Homo sapiens	Col6a1;Col6a2;Col8a1		R-HSA-4084903;R-HSA-2327695
R-HSA-9706369	Negative regulation of FLT3	1	20	0.00140144	0.423715	0.668153	12	12	0.000883848	9606	Homo sapiens	Flt3l		R-HSA-9706293;R-HSA-9706354;R-HSA-9706323;R-HSA-9706364;R-HSA-9706350;R-HSA-9706287;R-HSA-9706319;R-HSA-9698408;R-HSA-9706328;R-HSA-9706298;R-HSA-9706330;R-HSA-9706315
R-HSA-2142816	Synthesis of (16-20)-hydroxyeicosatetraenoic acids (HETE)	1	20	0.00140144	0.423715	0.668153	2	3	0.000220962	9606	Homo sapiens	Cyp2u1		R-HSA-2161940;R-HSA-2161814
R-HSA-140534	Caspase activation via Death Receptors in the presence of ligand	1	20	0.00140144	0.423715	0.668153	4	9	0.000662886	9606	Homo sapiens	Tnfsf10		R-HSA-139952;R-HSA-141156;R-HSA-3465448;R-HSA-3371359
R-HSA-8849471	PTK6 Regulates RHO GTPases, RAS GTPase and MAP kinases	1	20	0.00140144	0.423715	0.668153	2	13	0.000957502	9606	Homo sapiens	Bcar1		R-HSA-8848726;R-HSA-8848713
R-HSA-1362300	Transcription of E2F targets under negative control by p107 (RBL1) and p130 (RBL2) in complex with HDAC1	1	20	0.00140144	0.423715	0.668153	1	8	0.000589232	9606	Homo sapiens	Lin54		R-HSA-8964513
R-HSA-2187335	The retinoid cycle in cones (daylight vision)	1	20	0.00140144	0.423715	0.668153	1	13	0.000957502	9606	Homo sapiens	Awat2		R-HSA-2465919
R-HSA-168179	Toll Like Receptor TLR1:TLR2 Cascade	4	121	0.00847873	0.427063	0.668153	25	66	0.00486116	9606	Homo sapiens	Bcam;Map3k8;S100a9;S100a8		R-HSA-166082;R-HSA-2201316;R-HSA-451649;R-HSA-166091;R-HSA-2201322;R-HSA-5684250;R-HSA-166286;R-HSA-5684248;R-HSA-166284;R-HSA-2559414;R-HSA-2262775;R-HSA-166362;R-HSA-166363;R-HSA-2262777;R-HSA-168166;R-HSA-5684275;R-HSA-166119;R-HSA-5684273;R-HSA-937059;R-HSA-937022;R-HSA-5684261;R-HSA-451634;R-HSA-937079;R-HSA-166072;R-HSA-5684267
R-HSA-181438	Toll Like Receptor 2 (TLR2) Cascade	4	121	0.00847873	0.427063	0.668153	25	68	0.00500847	9606	Homo sapiens	Bcam;Map3k8;S100a9;S100a8		R-HSA-166082;R-HSA-2201316;R-HSA-451649;R-HSA-166091;R-HSA-2201322;R-HSA-5684250;R-HSA-166286;R-HSA-5684248;R-HSA-166284;R-HSA-2559414;R-HSA-2262775;R-HSA-166362;R-HSA-166363;R-HSA-2262777;R-HSA-168166;R-HSA-5684275;R-HSA-166119;R-HSA-5684273;R-HSA-937059;R-HSA-937022;R-HSA-5684261;R-HSA-451634;R-HSA-937079;R-HSA-166072;R-HSA-5684267
R-HSA-432040	Vasopressin regulates renal water homeostasis via Aquaporins	2	53	0.00371383	0.42883	0.668153	3	15	0.00110481	9606	Homo sapiens	Gng8;Dact3		R-HSA-432195;R-HSA-422320;R-HSA-432188
R-HSA-69202	Cyclin E associated events during G1/S transition	3	88	0.00616635	0.436727	0.668153	4	20	0.00147308	9606	Homo sapiens	Lin54;Ccnd1;Akt3		R-HSA-8848436;R-HSA-198613;R-HSA-8848414;R-HSA-188345
R-HSA-432047	Passive transport by Aquaporins	1	21	0.00147152	0.439391	0.668153	4	8	0.000589232	9606	Homo sapiens	Aqp7		R-HSA-507871;R-HSA-507870;R-HSA-507869;R-HSA-507868
R-HSA-430039	mRNA decay by 5' to 3' exoribonuclease	1	21	0.00147152	0.439391	0.668153	1	3	0.000220962	9606	Homo sapiens	Edc3		R-HSA-429860
R-HSA-3000471	Scavenging by Class B Receptors	1	21	0.00147152	0.439391	0.668153	1	5	0.00036827	9606	Homo sapiens	Ssc5d		R-HSA-8878603
R-HSA-9671793	Diseases of hemostasis	1	21	0.00147152	0.439391	0.668153	1	18	0.00132577	9606	Homo sapiens	Tpst1		R-HSA-9668148
R-HSA-9651496	Defects of contact activation system (CAS) and kallikrein/kinin system (KKS)	1	21	0.00147152	0.439391	0.668153	1	18	0.00132577	9606	Homo sapiens	Tpst1		R-HSA-9668148
R-HSA-69656	Cyclin A:Cdk2-associated events at S phase entry	3	90	0.0063065	0.451038	0.668153	4	19	0.00139943	9606	Homo sapiens	Lin54;Ccnd1;Akt3		R-HSA-8848436;R-HSA-198613;R-HSA-8848414;R-HSA-188345
R-HSA-174437	Removal of the Flap Intermediate from the C-strand	1	22	0.00154159	0.454641	0.668153	4	4	0.000294616	9606	Homo sapiens	Pot1a		R-HSA-174451;R-HSA-174441;R-HSA-174446;R-HSA-174445
R-HSA-372708	p130Cas linkage to MAPK signaling for integrins	1	22	0.00154159	0.454641	0.668153	3	3	0.000220962	9606	Homo sapiens	Bcar1		R-HSA-372693;R-HSA-372705;R-HSA-372697
R-HSA-174430	Telomere C-strand synthesis initiation	1	22	0.00154159	0.454641	0.668153	3	4	0.000294616	9606	Homo sapiens	Pot1a		R-HSA-9668597;R-HSA-174427;R-HSA-174425
R-HSA-190840	Microtubule-dependent trafficking of connexons from Golgi to the plasma membrane	1	22	0.00154159	0.454641	0.668153	1	2	0.000147308	9606	Homo sapiens	Tuba1b		R-HSA-190520
R-HSA-2408550	Metabolism of ingested H2SeO4 and H2SeO3 into H2Se	1	22	0.00154159	0.454641	0.668153	2	7	0.000515578	9606	Homo sapiens	Papss1		R-HSA-2408540;R-HSA-2408525
R-HSA-400511	Synthesis, secretion, and inactivation of Glucose-dependent Insulinotropic Polypeptide (GIP)	1	22	0.00154159	0.454641	0.668153	2	7	0.000515578	9606	Homo sapiens	Fap		R-HSA-9023627;R-HSA-9023626
R-HSA-1660517	Synthesis of PIPs at the late endosome membrane	1	22	0.00154159	0.454641	0.668153	1	7	0.000515578	9606	Homo sapiens	Pik3c2a		R-HSA-1676024
R-HSA-9679191	Potential therapeutics for SARS	3	91	0.00637657	0.458137	0.668153	2	34	0.00250424	9606	Homo sapiens	Rest;Chd3;Crbn		R-HSA-9681169;R-HSA-9679787
R-HSA-5632684	Hedgehog 'on' state	3	92	0.00644664	0.465198	0.668153	3	37	0.0027252	9606	Homo sapiens	Iqce;Gas1;Efcab7		R-HSA-5632668;R-HSA-5632649;R-HSA-5633051
R-HSA-70268	Pyruvate metabolism	2	57	0.00399411	0.465594	0.668153	4	15	0.00110481	9606	Homo sapiens	Slc16a3;Pdk2		R-HSA-373875;R-HSA-203946;R-HSA-373867;R-HSA-9011543
R-HSA-380108	Chemokine receptors bind chemokines	2	57	0.00399411	0.465594	0.668153	4	19	0.00139943	9606	Homo sapiens	Cxcl12;Ccl19		R-HSA-374214;R-HSA-373071;R-HSA-443978;R-HSA-3296301
R-HSA-2122947	NOTCH1 Intracellular Domain Regulates Transcription	2	57	0.00399411	0.465594	0.668153	3	18	0.00132577	9606	Homo sapiens	Hes1		R-HSA-1980047;R-HSA-4396347;R-HSA-1912359
R-HSA-73980	RNA Polymerase III Transcription Termination	1	23	0.00161166	0.469478	0.668153	1	2	0.000147308	9606	Homo sapiens	Nfix		R-HSA-113454
R-HSA-9613829	Chaperone Mediated Autophagy	1	23	0.00161166	0.469478	0.668153	9	19	0.00139943	9606	Homo sapiens	Arl13b		R-HSA-9625188;R-HSA-9620197;R-HSA-9622840;R-HSA-9615721;R-HSA-9624158;R-HSA-9622831;R-HSA-9625196;R-HSA-9626060;R-HSA-9625197
R-HSA-1839117	Signaling by cytosolic FGFR1 fusion mutants	1	23	0.00161166	0.469478	0.668153	6	14	0.00103116	9606	Homo sapiens	Lrrfip1		R-HSA-1839039;R-HSA-1839080;R-HSA-1839065;R-HSA-1839078;R-HSA-1839031;R-HSA-1839091
R-HSA-156711	Polo-like kinase mediated events	1	23	0.00161166	0.469478	0.668153	6	15	0.00110481	9606	Homo sapiens	Lin54		R-HSA-4088298;R-HSA-4088299;R-HSA-4088309;R-HSA-4088306;R-HSA-4088307;R-HSA-4088305
R-HSA-190872	Transport of connexons to the plasma membrane	1	23	0.00161166	0.469478	0.668153	1	3	0.000220962	9606	Homo sapiens	Tuba1b		R-HSA-190520
R-HSA-432142	Platelet sensitization by LDL	1	23	0.00161166	0.469478	0.668153	1	9	0.000662886	9606	Homo sapiens	Pla2g4a		R-HSA-428961
R-HSA-2979096	NOTCH2 Activation and Transmission of Signal to the Nucleus	1	23	0.00161166	0.469478	0.668153	1	11	0.000810194	9606	Homo sapiens	Mib2		R-HSA-2172172
R-HSA-210993	Tie2 Signaling	1	23	0.00161166	0.469478	0.668153	1	14	0.00103116	9606	Homo sapiens	Dok2		R-HSA-204850
R-HSA-109704	PI3K Cascade	2	58	0.00406419	0.474565	0.668153	1	6	0.000441924	9606	Homo sapiens	Flt3l;Irs2		R-HSA-109699
R-HSA-6811558	PI5P, PP2A and IER3 Regulate PI3K/AKT Signaling	4	129	0.00903931	0.475178	0.668153	1	7	0.000515578	9606	Homo sapiens	Flt3l;Irs2;Pik3cd;Esr2		R-HSA-2316434
R-HSA-9013409	RHOJ GTPase cycle	2	59	0.00413426	0.483445	0.668153	2	3	0.000220962	9606	Homo sapiens	Syde1;Arl13b		R-HSA-9017488;R-HSA-9017507
R-HSA-912631	Regulation of signaling by CBL	1	24	0.00168173	0.483912	0.668153	3	7	0.000515578	9606	Homo sapiens	Pik3cd		R-HSA-879917;R-HSA-912629;R-HSA-912627
R-HSA-113510	E2F mediated regulation of DNA replication	1	24	0.00168173	0.483912	0.668153	1	4	0.000294616	9606	Homo sapiens	Orc6		R-HSA-113638
R-HSA-2243919	Crosslinking of collagen fibrils	1	24	0.00168173	0.483912	0.668153	1	13	0.000957502	9606	Homo sapiens	Pcolce		R-HSA-2022141
R-HSA-6794361	Neurexins and neuroligins	2	60	0.00420433	0.492232	0.668153	5	19	0.00139943	9606	Homo sapiens	Shank3;Podn		R-HSA-6797974;R-HSA-6794357;R-HSA-6797554;R-HSA-6794351;R-HSA-6794344
R-HSA-4085001	Sialic acid metabolism	2	60	0.00420433	0.492232	0.668153	1	21	0.00154673	9606	Homo sapiens	St8sia6;St8sia1		R-HSA-4084978
R-HSA-390466	Chaperonin-mediated protein folding	3	96	0.00672693	0.49302	0.668153	4	19	0.00139943	9606	Homo sapiens	Tuba1b;Gng8;Dact3		R-HSA-6814418;R-HSA-389954;R-HSA-8850560;R-HSA-389961
R-HSA-1362277	Transcription of E2F targets under negative control by DREAM complex	1	25	0.0017518	0.497954	0.668153	12	12	0.000883848	9606	Homo sapiens	Lin54		R-HSA-8964475;R-HSA-8964492;R-HSA-8964525;R-HSA-8961665;R-HSA-8964513;R-HSA-8964465;R-HSA-8964482;R-HSA-8964498;R-HSA-8964531;R-HSA-8961619;R-HSA-188345;R-HSA-8964471
R-HSA-389977	Post-chaperonin tubulin folding pathway	1	25	0.0017518	0.497954	0.668153	6	9	0.000662886	9606	Homo sapiens	Tuba1b		R-HSA-389972;R-HSA-389974;R-HSA-389964;R-HSA-389976;R-HSA-389963;R-HSA-389978
R-HSA-8848584	Wax and plasmalogen biosynthesis	1	25	0.0017518	0.497954	0.668153	2	10	0.00073654	9606	Homo sapiens	Awat2		R-HSA-8848582;R-HSA-8848585
R-HSA-389513	CTLA4 inhibitory signaling	1	25	0.0017518	0.497954	0.668153	1	5	0.00036827	9606	Homo sapiens	Akt3		R-HSA-390329
R-HSA-1482922	Acyl chain remodelling of PI	1	25	0.0017518	0.497954	0.668153	1	6	0.000441924	9606	Homo sapiens	Pla2g4a		R-HSA-1482825
R-HSA-71288	Creatine metabolism	1	25	0.0017518	0.497954	0.668153	1	6	0.000441924	9606	Homo sapiens	Ckb		R-HSA-200318
R-HSA-2022870	Chondroitin sulfate biosynthesis	1	25	0.0017518	0.497954	0.668153	1	9	0.000662886	9606	Homo sapiens	Csgalnact2		R-HSA-1971482
R-HSA-391903	Eicosanoid ligand-binding receptors	1	25	0.0017518	0.497954	0.668153	1	14	0.00103116	9606	Homo sapiens	Gpr1		R-HSA-391934
R-HSA-4551638	SUMOylation of chromatin organization proteins	2	62	0.00434447	0.509519	0.668153	3	15	0.00110481	9606	Homo sapiens	Chd3;Nup160		R-HSA-4615987;R-HSA-8956365;R-HSA-4615872
R-HSA-1482925	Acyl chain remodelling of PG	1	26	0.00182188	0.511615	0.668153	1	10	0.00073654	9606	Homo sapiens	Pla2g4a		R-HSA-1482900
R-HSA-210991	Basigin interactions	1	26	0.00182188	0.511615	0.668153	1	10	0.00073654	9606	Homo sapiens	Slc16a3		R-HSA-204392
R-HSA-373080	Class B/2 (Secretin family receptors)	3	99	0.00693715	0.513411	0.668153	2	20	0.00147308	9606	Homo sapiens	Fzd2;Gng8;Dact3		R-HSA-381612;R-HSA-201708
R-HSA-6811436	COPI-independent Golgi-to-ER retrograde traffic	2	63	0.00441455	0.518018	0.668153	3	7	0.000515578	9606	Homo sapiens	Tuba1b;Pla2g4a		R-HSA-8849350;R-HSA-8848484;R-HSA-8849353
R-HSA-3214815	HDACs deacetylate histones	2	63	0.00441455	0.518018	0.668153	2	5	0.00036827	9606	Homo sapiens	Rest;Chd3		R-HSA-9679787;R-HSA-3769447
R-HSA-9013406	RHOQ GTPase cycle	2	63	0.00441455	0.518018	0.668153	2	5	0.00036827	9606	Homo sapiens	Syde1;Arl13b		R-HSA-9018745;R-HSA-9018746
R-HSA-913531	Interferon Signaling	11	394	0.0276084	0.523542	0.668153	6	69	0.00508212	9606	Homo sapiens	H2-Eb1;Camk2a;Trim46;Nup160;Ifi30;H2-Aa;Ip6k2;H2-Ab1		R-HSA-1015702;R-HSA-1176059;R-HSA-1031716;R-HSA-1015699;R-HSA-909552;R-HSA-1031713
R-HSA-6785807	Interleukin-4 and Interleukin-13 signaling	6	211	0.0147852	0.524437	0.668153	3	47	0.00346174	9606	Homo sapiens	Ccnd1;Mmp2;Fscn1		R-HSA-6790036;R-HSA-6789615;R-HSA-6790041
R-HSA-438066	Unblocking of NMDA receptors, glutamate binding and activation	1	27	0.00189195	0.524905	0.668153	5	5	0.00036827	9606	Homo sapiens	Camk2a		R-HSA-432164;R-HSA-438037;R-HSA-432162;R-HSA-432172;R-HSA-9614185
R-HSA-442982	Ras activation upon Ca2+ influx through NMDA receptor	1	27	0.00189195	0.524905	0.668153	2	2	0.000147308	9606	Homo sapiens	Camk2a		R-HSA-442732;R-HSA-442760
R-HSA-9617324	Negative regulation of NMDA receptor-mediated neuronal transmission	1	27	0.00189195	0.524905	0.668153	2	4	0.000294616	9606	Homo sapiens	Camk2a		R-HSA-9619449;R-HSA-9617326
R-HSA-211958	Miscellaneous substrates	1	27	0.00189195	0.524905	0.668153	1	5	0.00036827	9606	Homo sapiens	Cyp2u1		R-HSA-211960
R-HSA-196108	Pregnenolone biosynthesis	1	27	0.00189195	0.524905	0.668153	1	9	0.000662886	9606	Homo sapiens	Stard3nl		R-HSA-196126
R-HSA-391251	Protein folding	3	102	0.00714736	0.533358	0.668153	10	28	0.00206231	9606	Homo sapiens	Tuba1b;Gng8;Dact3		R-HSA-389972;R-HSA-389974;R-HSA-6814418;R-HSA-389954;R-HSA-8850560;R-HSA-389964;R-HSA-389961;R-HSA-389976;R-HSA-389963;R-HSA-389978
R-HSA-112399	IRS-mediated signalling	2	65	0.00455469	0.534718	0.668153	4	9	0.000662886	9606	Homo sapiens	Flt3l;Irs2		R-HSA-74737;R-HSA-74736;R-HSA-109699;R-HSA-109817
R-HSA-6791312	TP53 Regulates Transcription of Cell Cycle Genes	2	65	0.00455469	0.534718	0.668153	2	42	0.00309347	9606	Homo sapiens	Rgcc		R-HSA-6803917;R-HSA-6803914
R-HSA-200425	Carnitine metabolism	1	28	0.00196202	0.537834	0.668153	1	9	0.000662886	9606	Homo sapiens	Slc22a4		R-HSA-165026
R-HSA-112409	RAF-independent MAPK1/3 activation	1	28	0.00196202	0.537834	0.668153	1	12	0.000883848	9606	Homo sapiens	Dusp2		R-HSA-5675373
R-HSA-2173788	Downregulation of TGF-beta receptor signaling	1	28	0.00196202	0.537834	0.668153	2	28	0.00206231	9606	Homo sapiens	Pmepa1		R-HSA-2187355;R-HSA-2187358
R-HSA-9013507	NOTCH3 Activation and Transmission of Signal to the Nucleus	1	28	0.00196202	0.537834	0.668153	1	15	0.00110481	9606	Homo sapiens	Mib2		R-HSA-9013069
R-HSA-8979227	Triglyceride metabolism	2	66	0.00462476	0.542919	0.668153	9	24	0.0017677	9606	Homo sapiens	Mgl2;Lipe;Mgll		R-HSA-163554;R-HSA-163602;R-HSA-163489;R-HSA-163402;R-HSA-163595;R-HSA-163432;R-HSA-163416;R-HSA-163551;R-HSA-163549
R-HSA-912526	Interleukin receptor SHC signaling	1	29	0.00203209	0.550413	0.668153	1	6	0.000441924	9606	Homo sapiens	Pik3cd		R-HSA-508247
R-HSA-9648895	Response of EIF2AK1 (HRI) to heme deficiency	1	29	0.00203209	0.550413	0.668153	2	20	0.00147308	9606	Homo sapiens	Atf3		R-HSA-9653894;R-HSA-9653893
R-HSA-5674400	Constitutive Signaling by AKT1 E17K in Cancer	1	29	0.00203209	0.550413	0.668153	1	18	0.00132577	9606	Homo sapiens	Akt3		R-HSA-2400010
R-HSA-982772	Growth hormone receptor signaling	1	29	0.00203209	0.550413	0.668153	1	28	0.00206231	9606	Homo sapiens	Irs2		R-HSA-1168423
R-HSA-112043	PLC beta mediated events	2	67	0.00469484	0.551018	0.668153	5	32	0.00235693	9606	Homo sapiens	Camk2a;Pla2g4a		R-HSA-442725;R-HSA-111881;R-HSA-111883;R-HSA-111898;R-HSA-9617583
R-HSA-156590	Glutathione conjugation	2	68	0.00476491	0.559016	0.668153	1	14	0.00103116	9606	Homo sapiens	Gstt2		R-HSA-176054
R-HSA-4839726	Chromatin organization	7	256	0.0179385	0.559093	0.668153	13	85	0.00626059	9606	Homo sapiens	Rest;Chd3;Ccnd1;Dmap1;Padi3;Jarid2		R-HSA-3247569;R-HSA-5216234;R-HSA-3321975;R-HSA-5205799;R-HSA-3215385;R-HSA-5661116;R-HSA-5205861;R-HSA-1183128;R-HSA-5661117;R-HSA-4754181;R-HSA-3215426;R-HSA-9679787;R-HSA-3769447
R-HSA-3247509	Chromatin modifying enzymes	7	256	0.0179385	0.559093	0.668153	13	85	0.00626059	9606	Homo sapiens	Rest;Chd3;Ccnd1;Dmap1;Padi3;Jarid2		R-HSA-3247569;R-HSA-5216234;R-HSA-3321975;R-HSA-5205799;R-HSA-3215385;R-HSA-5661116;R-HSA-5205861;R-HSA-1183128;R-HSA-5661117;R-HSA-4754181;R-HSA-3215426;R-HSA-9679787;R-HSA-3769447
R-HSA-422356	Regulation of insulin secretion	3	106	0.00742765	0.559223	0.668153	9	34	0.00250424	9606	Homo sapiens	Gnai2;Gng8;Dact3		R-HSA-400037;R-HSA-422320;R-HSA-400097;R-HSA-400046;R-HSA-381612;R-HSA-400063;R-HSA-400092;R-HSA-265166;R-HSA-381706
R-HSA-6811442	Intra-Golgi and retrograde Golgi-to-ER traffic	6	219	0.0153458	0.560546	0.668153	17	48	0.00353539	9606	Homo sapiens	Tmf1;Tuba1b;Arfgap3;Pla2g4a;Cog7;Sat1		R-HSA-6811431;R-HSA-8849350;R-HSA-6811429;R-HSA-8848484;R-HSA-6811428;R-HSA-6811426;R-HSA-8847887;R-HSA-6814091;R-HSA-8849353;R-HSA-6811433;R-HSA-8849748;R-HSA-8847635;R-HSA-6811423;R-HSA-6814682;R-HSA-6811418;R-HSA-6811417;R-HSA-8847544
R-HSA-389960	Formation of tubulin folding intermediates by CCT/TriC	1	30	0.00210217	0.56265	0.668153	2	2	0.000147308	9606	Homo sapiens	Tuba1b		R-HSA-389954;R-HSA-389961
R-HSA-204174	Regulation of pyruvate dehydrogenase (PDH) complex	1	30	0.00210217	0.56265	0.668153	2	4	0.000294616	9606	Homo sapiens	Pdk2		R-HSA-203946;R-HSA-9011543
R-HSA-70921	Histidine catabolism	1	30	0.00210217	0.56265	0.668153	1	8	0.000589232	9606	Homo sapiens	Carns1		R-HSA-6786245
R-HSA-6783589	Interleukin-6 family signaling	1	30	0.00210217	0.56265	0.668153	4	34	0.00250424	9606	Homo sapiens	Crlf1		R-HSA-6783670;R-HSA-6783556;R-HSA-5696490;R-HSA-6783530
R-HSA-201451	Signaling by BMP	1	30	0.00210217	0.56265	0.668153	1	17	0.00125212	9606	Homo sapiens	Fstl1		R-HSA-201810
R-HSA-6807878	COPI-mediated anterograde transport	3	107	0.00749772	0.565554	0.668153	6	12	0.000883848	9606	Homo sapiens	Tuba1b;Arfgap3;Cog7		R-HSA-6807877;R-HSA-6807875;R-HSA-6809011;R-HSA-6809010;R-HSA-6809006;R-HSA-6809003
R-HSA-2428928	IRS-related events triggered by IGF1R	2	69	0.00483498	0.566913	0.668153	6	12	0.000883848	9606	Homo sapiens	Flt3l;Irs2		R-HSA-74737;R-HSA-74736;R-HSA-109699;R-HSA-109817;R-HSA-2428926;R-HSA-2428922
R-HSA-1660499	Synthesis of PIPs at the plasma membrane	2	69	0.00483498	0.566913	0.668153	2	33	0.00243058	9606	Homo sapiens	Pik3c2a;Pik3cd		R-HSA-1676109;R-HSA-1676048
R-HSA-1483206	Glycerophospholipid biosynthesis	6	222	0.015556	0.573753	0.668153	18	133	0.00979598	9606	Homo sapiens	Ache;Cpn1;Awat2;Mgl2;Hes1;Pla2g4a;Mgll		R-HSA-1482900;R-HSA-1482612;R-HSA-372519;R-HSA-8867876;R-HSA-1482771;R-HSA-1482897;R-HSA-1482685;R-HSA-1482759;R-HSA-1482884;R-HSA-1482656;R-HSA-5696448;R-HSA-1482862;R-HSA-1482543;R-HSA-1482828;R-HSA-1482604;R-HSA-1482856;R-HSA-1482825;R-HSA-5333678
R-HSA-9620244	Long-term potentiation	1	31	0.00217224	0.574554	0.668153	5	7	0.000515578	9606	Homo sapiens	Camk2a		R-HSA-445367;R-HSA-442725;R-HSA-9612085;R-HSA-9618750;R-HSA-9617583
R-HSA-174411	Polymerase switching on the C-strand of the telomere	1	31	0.00217224	0.574554	0.668153	4	6	0.000441924	9606	Homo sapiens	Pot1a		R-HSA-174448;R-HSA-174439;R-HSA-174452;R-HSA-174447
R-HSA-1660516	Synthesis of PIPs at the early endosome membrane	1	31	0.00217224	0.574554	0.668153	2	13	0.000957502	9606	Homo sapiens	Pik3c2a		R-HSA-1676206;R-HSA-1675939
R-HSA-3214842	HDMs demethylate histones	1	31	0.00217224	0.574554	0.668153	2	17	0.00125212	9606	Homo sapiens	Jarid2		R-HSA-5661116;R-HSA-4754181
R-HSA-1266695	Interleukin-7 signaling	1	31	0.00217224	0.574554	0.668153	1	26	0.001915	9606	Homo sapiens	Irs2		R-HSA-8983003
R-HSA-8943724	Regulation of PTEN gene transcription	2	70	0.00490505	0.574707	0.668153	3	15	0.00110481	9606	Homo sapiens	Rest;Chd3		R-HSA-8944104;R-HSA-6807077;R-HSA-8943780
R-HSA-375165	NCAM signaling for neurite out-growth	2	70	0.00490505	0.574707	0.668153	1	23	0.00169404	9606	Homo sapiens	Col6a1;Col6a2		R-HSA-375151
R-HSA-373755	Semaphorin interactions	2	71	0.00497512	0.582398	0.668153	5	41	0.00301981	9606	Homo sapiens	Dpysl3;Plxnd1		R-HSA-416690;R-HSA-399951;R-HSA-416683;R-HSA-399947;R-HSA-399944
R-HSA-8848021	Signaling by PTK6	2	71	0.00497512	0.582398	0.668153	4	53	0.00390366	9606	Homo sapiens	Ccnd1;Bcar1		R-HSA-8848726;R-HSA-8848436;R-HSA-8848414;R-HSA-8848713
R-HSA-9006927	Signaling by Non-Receptor Tyrosine Kinases	2	71	0.00497512	0.582398	0.668153	4	53	0.00390366	9606	Homo sapiens	Ccnd1;Bcar1		R-HSA-8848726;R-HSA-8848436;R-HSA-8848414;R-HSA-8848713
R-HSA-9616222	Transcriptional regulation of granulopoiesis	2	71	0.00497512	0.582398	0.668153	2	27	0.00198866	9606	Homo sapiens	Klf5		R-HSA-9634442;R-HSA-9622363
R-HSA-2426168	Activation of gene expression by SREBF (SREBP)	2	71	0.00497512	0.582398	0.668153	2	42	0.00309347	9606	Homo sapiens	Ggps1		R-HSA-1655832;R-HSA-2426161
R-HSA-9615933	Postmitotic nuclear pore complex (NPC) reformation	1	32	0.00224231	0.586136	0.668153	6	10	0.00073654	9606	Homo sapiens	Nup160		R-HSA-9615937;R-HSA-9634219;R-HSA-9618378;R-HSA-9634169;R-HSA-9615945;R-HSA-9615901
R-HSA-1660514	Synthesis of PIPs at the Golgi membrane	1	32	0.00224231	0.586136	0.668153	2	11	0.000810194	9606	Homo sapiens	Pik3c2a		R-HSA-1675961;R-HSA-1675928
R-HSA-8934593	Regulation of RUNX1 Expression and Activity	1	32	0.00224231	0.586136	0.668153	2	19	0.00139943	9606	Homo sapiens	Ccnd1		R-HSA-8938867;R-HSA-8865320
R-HSA-2122948	Activated NOTCH1 Transmits Signal to the Nucleus	1	32	0.00224231	0.586136	0.668153	1	21	0.00154673	9606	Homo sapiens	Mib2		R-HSA-1980074
R-HSA-74751	Insulin receptor signalling cascade	2	72	0.0050452	0.589987	0.668153	10	25	0.00184135	9606	Homo sapiens	Flt3l;Irs2		R-HSA-74737;R-HSA-74736;R-HSA-109699;R-HSA-74707;R-HSA-74711;R-HSA-109817;R-HSA-74712;R-HSA-74747;R-HSA-5686315;R-HSA-109823
R-HSA-2428924	IGF1R signaling cascade	2	72	0.0050452	0.589987	0.668153	6	17	0.00125212	9606	Homo sapiens	Flt3l;Irs2		R-HSA-74737;R-HSA-74736;R-HSA-109699;R-HSA-109817;R-HSA-2428926;R-HSA-2428922
R-HSA-389661	Glyoxylate metabolism and glycine degradation	2	72	0.0050452	0.589987	0.668153	2	23	0.00169404	9606	Homo sapiens	Dhtkd1;Hoga1		R-HSA-6784423;R-HSA-6792572
R-HSA-69206	G1/S Transition	4	150	0.0105108	0.592777	0.668153	14	61	0.00449289	9606	Homo sapiens	Lin54;Orc6;Ccnd1;Akt3		R-HSA-68960;R-HSA-113638;R-HSA-8961665;R-HSA-68940;R-HSA-68914;R-HSA-8848436;R-HSA-68917;R-HSA-68916;R-HSA-68919;R-HSA-198613;R-HSA-68918;R-HSA-8848414;R-HSA-188345;R-HSA-8961619
R-HSA-174414	Processive synthesis on the C-strand of the telomere	1	33	0.00231238	0.597403	0.668153	7	7	0.000515578	9606	Homo sapiens	Pot1a		R-HSA-174451;R-HSA-174438;R-HSA-174456;R-HSA-174441;R-HSA-174446;R-HSA-174444;R-HSA-174445
R-HSA-73863	RNA Polymerase I Transcription Termination	1	33	0.00231238	0.597403	0.668153	2	4	0.000294616	9606	Homo sapiens	Ptrf		R-HSA-74993;R-HSA-74992
R-HSA-6802952	Signaling by BRAF and RAF1 fusions	2	73	0.00511527	0.597473	0.668153	5	5	0.00036827	9606	Homo sapiens	Camk2a;Papss1		R-HSA-6802935;R-HSA-6802934;R-HSA-6802933;R-HSA-6802932;R-HSA-6802927
R-HSA-2404192	Signaling by Type 1 Insulin-like Growth Factor 1 Receptor (IGF1R)	2	73	0.00511527	0.597473	0.668153	6	19	0.00139943	9606	Homo sapiens	Flt3l;Irs2		R-HSA-74737;R-HSA-74736;R-HSA-109699;R-HSA-109817;R-HSA-2428926;R-HSA-2428922
R-HSA-166016	Toll Like Receptor 4 (TLR4) Cascade	4	151	0.0105809	0.597983	0.668153	25	95	0.00699713	9606	Homo sapiens	Bcam;Map3k8;S100a9;S100a8		R-HSA-166082;R-HSA-2201316;R-HSA-451649;R-HSA-166091;R-HSA-2201322;R-HSA-5684250;R-HSA-166286;R-HSA-5684248;R-HSA-166284;R-HSA-2559414;R-HSA-2262775;R-HSA-166362;R-HSA-166363;R-HSA-2262777;R-HSA-168166;R-HSA-5684275;R-HSA-166119;R-HSA-5684273;R-HSA-937059;R-HSA-937022;R-HSA-5684261;R-HSA-451634;R-HSA-937079;R-HSA-166072;R-HSA-5684267
R-HSA-163841	Gamma carboxylation, hypusine formation and arylsulfatase activation	2	74	0.00518534	0.604856	0.668153	4	40	0.00294616	9606	Homo sapiens	Tpst1;Gas6		R-HSA-163810;R-HSA-163843;R-HSA-163809;R-HSA-9668023
R-HSA-1280215	Cytokine Signaling in Immune system	29	1092	0.0765188	0.607777	0.668153	92	708	0.052147	9606	Homo sapiens	H2-Eb1;Ccnd1;Mmp2;Il17re;Fscn1;Flt3l;Ccl19;Trim46;Irs2;Map3k8;Sod3;Crlf1;H2-Aa;Ip6k2;Bcam;Camk2a;Akt3;Nup160;Ifi30;Pik3cd;Map3k14;H2-Ab1		R-HSA-6786789;R-HSA-5678544;R-HSA-6789615;R-HSA-914182;R-HSA-9604767;R-HSA-9604738;R-HSA-9606784;R-HSA-5668545;R-HSA-5668417;R-HSA-9607301;R-HSA-1015702;R-HSA-9605259;R-HSA-9607304;R-HSA-1015699;R-HSA-879917;R-HSA-9706293;R-HSA-6783556;R-HSA-9609274;R-HSA-9607224;R-HSA-1031716;R-HSA-9706298;R-HSA-1031713;R-HSA-5668454;R-HSA-451634;R-HSA-1168423;R-HSA-9706287;R-HSA-5696490;R-HSA-9645137;R-HSA-8950…
R-HSA-171306	Packaging Of Telomere Ends	1	34	0.00238245	0.608364	0.668153	2	2	0.000147308	9606	Homo sapiens	Pot1a		R-HSA-181450;R-HSA-176700
R-HSA-171319	Telomere Extension By Telomerase	1	34	0.00238245	0.608364	0.668153	8	10	0.00073654	9606	Homo sapiens	Pot1a		R-HSA-163090;R-HSA-163120;R-HSA-163099;R-HSA-163096;R-HSA-9686521;R-HSA-164617;R-HSA-164620;R-HSA-9686524
R-HSA-5576892	Phase 0 - rapid depolarisation	1	34	0.00238245	0.608364	0.668153	1	2	0.000147308	9606	Homo sapiens	Camk2a		R-HSA-5576895
R-HSA-9619483	Activation of AMPK downstream of NMDARs	1	34	0.00238245	0.608364	0.668153	1	3	0.000220962	9606	Homo sapiens	Tuba1b		R-HSA-9619542
R-HSA-112311	Neurotransmitter clearance	1	34	0.00238245	0.608364	0.668153	2	13	0.000957502	9606	Homo sapiens	Ache		R-HSA-9634834;R-HSA-372519
R-HSA-8940973	RUNX2 regulates osteoblast differentiation	1	34	0.00238245	0.608364	0.668153	1	24	0.0017677	9606	Homo sapiens	Hes1		R-HSA-9008177
R-HSA-163125	Post-translational modification: synthesis of GPI-anchored proteins	3	115	0.0080583	0.614146	0.668153	3	16	0.00117846	9606	Homo sapiens	Pigt;Piga;Rtn4rl1		R-HSA-162836;R-HSA-162730;R-HSA-8940388
R-HSA-381119	Unfolded Protein Response (UPR)	4	155	0.0108612	0.618403	0.668153	2	94	0.00692347	9606	Homo sapiens	Ddx11;Atf3		R-HSA-1791116;R-HSA-1791173
R-HSA-9615710	Late endosomal microautophagy	1	35	0.00245253	0.619027	0.668153	3	3	0.000220962	9606	Homo sapiens	Arl13b		R-HSA-9631065;R-HSA-9615721;R-HSA-9631068
R-HSA-210745	Regulation of gene expression in beta cells	1	35	0.00245253	0.619027	0.668153	1	12	0.000883848	9606	Homo sapiens	Akt3		R-HSA-211164
R-HSA-9006936	Signaling by TGFB family members	3	116	0.00812837	0.619956	0.668153	4	113	0.0083229	9606	Homo sapiens	Ccnt1;Pmepa1;Fstl1		R-HSA-201810;R-HSA-2187355;R-HSA-2176475;R-HSA-2187358
R-HSA-448424	Interleukin-17 signaling	2	77	0.00539556	0.626388	0.668153	9	35	0.00257789	9606	Homo sapiens	Il17re;Map3k8		R-HSA-5684261;R-HSA-451634;R-HSA-5684275;R-HSA-5678544;R-HSA-451649;R-HSA-5684273;R-HSA-5684250;R-HSA-5684267;R-HSA-5684248
R-HSA-5619107	Defective TPR may confer susceptibility towards thyroid papillary carcinoma (TPC)	1	36	0.0025226	0.629401	0.668153	1	1	7.3654e-05	9606	Homo sapiens	Nup160		R-HSA-5661474
R-HSA-68962	Activation of the pre-replicative complex	1	36	0.0025226	0.629401	0.668153	7	9	0.000662886	9606	Homo sapiens	Orc6		R-HSA-68960;R-HSA-68914;R-HSA-68917;R-HSA-68916;R-HSA-68919;R-HSA-68918;R-HSA-68940
R-HSA-9687139	Aberrant regulation of mitotic cell cycle due to RB1 defects	1	36	0.0025226	0.629401	0.668153	1	3	0.000220962	9606	Homo sapiens	Ccnd1		R-HSA-9659782
R-HSA-5626467	RHO GTPases activate IQGAPs	1	36	0.0025226	0.629401	0.668153	1	5	0.00036827	9606	Homo sapiens	Tuba1b		R-HSA-5672329
R-HSA-162710	Synthesis of glycosylphosphatidylinositol (GPI)	1	36	0.0025226	0.629401	0.668153	1	11	0.000810194	9606	Homo sapiens	Piga		R-HSA-162730
R-HSA-5223345	Miscellaneous transport and binding events	1	36	0.0025226	0.629401	0.668153	1	13	0.000957502	9606	Homo sapiens	Add3		R-HSA-5226999
R-HSA-8863795	Downregulation of ERBB2 signaling	1	36	0.0025226	0.629401	0.668153	1	14	0.00103116	9606	Homo sapiens	Akt3		R-HSA-1358791
R-HSA-114452	Activation of BH3-only proteins	1	36	0.0025226	0.629401	0.668153	1	19	0.00139943	9606	Homo sapiens	Akt3		R-HSA-198347
R-HSA-2173789	TGF-beta receptor signaling activates SMADs	1	36	0.0025226	0.629401	0.668153	2	39	0.0028725	9606	Homo sapiens	Pmepa1		R-HSA-2187355;R-HSA-2187358
R-HSA-418346	Platelet homeostasis	3	118	0.00826852	0.631399	0.668153	4	30	0.00220962	9606	Homo sapiens	Gng8;Pla2g4a;Dact3		R-HSA-392852;R-HSA-392870;R-HSA-428961;R-HSA-392874
R-HSA-9660821	ADORA2B mediated anti-inflammatory cytokines production	4	159	0.0111415	0.638165	0.668153	4	12	0.000883848	9606	Homo sapiens	Mc5r;Gnai2;Gng8;Dact3		R-HSA-9660819;R-HSA-392129;R-HSA-9660824;R-HSA-9660828
R-HSA-1483257	Phospholipid metabolism	8	315	0.0220727	0.638988	0.668153	25	218	0.0160566	9606	Homo sapiens	Ache;Cpn1;Awat2;Mgl2;Hes1;Pla2g4a;Pik3c2a;Pik3cd;Mgll		R-HSA-1675928;R-HSA-1482900;R-HSA-1482771;R-HSA-1482897;R-HSA-1676048;R-HSA-1482759;R-HSA-1482884;R-HSA-1676109;R-HSA-5696448;R-HSA-1482828;R-HSA-1482825;R-HSA-1675961;R-HSA-1676024;R-HSA-1482612;R-HSA-372519;R-HSA-8867876;R-HSA-1482685;R-HSA-1482656;R-HSA-1676206;R-HSA-1482862;R-HSA-1482543;R-HSA-1482604;R-HSA-1675939;R-HSA-1482856;R-HSA-5333678
R-HSA-936440	Negative regulators of DDX58/IFIH1 signaling	1	37	0.00259267	0.639493	0.668153	6	13	0.000957502	9606	Homo sapiens	Rnf135		R-HSA-990526;R-HSA-937343;R-HSA-936381;R-HSA-936378;R-HSA-936475;R-HSA-990528
R-HSA-389958	Cooperation of Prefoldin and TriC/CCT in actin and tubulin folding	1	37	0.00259267	0.639493	0.668153	2	6	0.000441924	9606	Homo sapiens	Tuba1b		R-HSA-389954;R-HSA-389961
R-HSA-399719	Trafficking of AMPA receptors	1	37	0.00259267	0.639493	0.668153	1	4	0.000294616	9606	Homo sapiens	Camk2a		R-HSA-416320
R-HSA-5694530	Cargo concentration in the ER	1	37	0.00259267	0.639493	0.668153	2	12	0.000883848	9606	Homo sapiens	Ctsz		R-HSA-5694428;R-HSA-5694522
R-HSA-203615	eNOS activation	1	37	0.00259267	0.639493	0.668153	2	20	0.00147308	9606	Homo sapiens	Cygb		R-HSA-5340226;R-HSA-5340214
R-HSA-186763	Downstream signal transduction	1	37	0.00259267	0.639493	0.668153	1	16	0.00117846	9606	Homo sapiens	Bcar1		R-HSA-382052
R-HSA-3000178	ECM proteoglycans	2	79	0.0055357	0.640231	0.668153	3	23	0.00169404	9606	Homo sapiens	Col6a1;Col6a2		R-HSA-2327909;R-HSA-2465883;R-HSA-2466106
R-HSA-1660661	Sphingolipid de novo biosynthesis	2	80	0.00560577	0.647	0.668153	2	32	0.00235693	9606	Homo sapiens	Acer3;Sptssa		R-HSA-428262;R-HSA-428127
R-HSA-9648025	EML4 and NUDC in mitotic spindle formation	3	121	0.00847873	0.648112	0.668153	2	5	0.00036827	9606	Homo sapiens	Cenpq;Tuba1b;Nup160		R-HSA-9648114;R-HSA-9648017
R-HSA-1538133	G0 and Early G1	1	38	0.00266274	0.64931	0.668153	14	27	0.00198866	9606	Homo sapiens	Lin54		R-HSA-1362261;R-HSA-8964492;R-HSA-8964525;R-HSA-8961665;R-HSA-8964513;R-HSA-8964482;R-HSA-1362270;R-HSA-8964475;R-HSA-8964465;R-HSA-8964498;R-HSA-8964531;R-HSA-8961619;R-HSA-188345;R-HSA-8964471
R-HSA-9013407	RHOH GTPase cycle	1	38	0.00266274	0.64931	0.668153	1	3	0.000220962	9606	Homo sapiens	Tuba1b		R-HSA-9018758
R-HSA-9675126	Diseases of mitotic cell cycle	1	38	0.00266274	0.64931	0.668153	1	5	0.00036827	9606	Homo sapiens	Ccnd1		R-HSA-9659782
R-HSA-5675482	Regulation of necroptotic cell death	1	38	0.00266274	0.64931	0.668153	2	18	0.00132577	9606	Homo sapiens	Tnfsf10		R-HSA-3465429;R-HSA-5675456
R-HSA-2173796	SMAD2/SMAD3:SMAD4 heterotrimer regulates transcription	1	38	0.00266274	0.64931	0.668153	1	19	0.00139943	9606	Homo sapiens	Ccnt1		R-HSA-2176475
R-HSA-167243	Tat-mediated HIV elongation arrest and recovery	1	39	0.00273281	0.658861	0.668153	3	3	0.000220962	9606	Homo sapiens	Ccnt1		R-HSA-167090;R-HSA-167459;R-HSA-167148
R-HSA-159227	Transport of the SLBP independent Mature mRNA	1	39	0.00273281	0.658861	0.668153	3	3	0.000220962	9606	Homo sapiens	Nup160		R-HSA-158481;R-HSA-158484;R-HSA-111439
R-HSA-167238	Pausing and recovery of Tat-mediated HIV elongation	1	39	0.00273281	0.658861	0.668153	2	2	0.000147308	9606	Homo sapiens	Ccnt1		R-HSA-167076;R-HSA-167150
R-HSA-5083635	Defective B3GALTL causes PpS	1	39	0.00273281	0.658861	0.668153	1	1	7.3654e-05	9606	Homo sapiens	Adamts15		R-HSA-6785565
R-HSA-4085377	SUMOylation of SUMOylation proteins	1	39	0.00273281	0.658861	0.668153	2	5	0.00036827	9606	Homo sapiens	Nup160		R-HSA-4551649;R-HSA-4551679
R-HSA-442742	CREB1 phosphorylation through NMDA receptor-mediated activation of RAS signaling	1	39	0.00273281	0.658861	0.668153	2	7	0.000515578	9606	Homo sapiens	Camk2a		R-HSA-442732;R-HSA-442760
R-HSA-1839124	FGFR1 mutant receptor activation	1	39	0.00273281	0.658861	0.668153	6	25	0.00184135	9606	Homo sapiens	Lrrfip1		R-HSA-1839039;R-HSA-1839080;R-HSA-1839065;R-HSA-1839078;R-HSA-1839031;R-HSA-1839091
R-HSA-176187	Activation of ATR in response to replication stress	1	39	0.00273281	0.658861	0.668153	2	9	0.000662886	9606	Homo sapiens	Orc6		R-HSA-176298;R-HSA-176318
R-HSA-110330	Recognition and association of DNA glycosylase with site containing an affected purine	1	39	0.00273281	0.658861	0.668153	2	10	0.00073654	9606	Homo sapiens	Pot1a		R-HSA-9629195;R-HSA-9629373
R-HSA-445989	TAK1 activates NFkB by phosphorylation and activation of IKKs complex	1	39	0.00273281	0.658861	0.668153	1	5	0.00036827	9606	Homo sapiens	Bcam		R-HSA-168166
R-HSA-9668328	Sealing of the nuclear envelope (NE) by ESCRT-III	1	39	0.00273281	0.658861	0.668153	1	7	0.000515578	9606	Homo sapiens	Tuba1b		R-HSA-9668419
R-HSA-354192	Integrin signaling	1	39	0.00273281	0.658861	0.668153	3	24	0.0017677	9606	Homo sapiens	Bcar1		R-HSA-372693;R-HSA-372705;R-HSA-372697
R-HSA-399721	Glutamate binding, activation of AMPA receptors and synaptic plasticity	1	39	0.00273281	0.658861	0.668153	1	9	0.000662886	9606	Homo sapiens	Camk2a		R-HSA-416320
R-HSA-9022692	Regulation of MECP2 expression and activity	1	39	0.00273281	0.658861	0.668153	1	14	0.00103116	9606	Homo sapiens	Camk2a		R-HSA-9006992
R-HSA-1236394	Signaling by ERBB4	2	82	0.00574592	0.660236	0.668153	2	52	0.00383001	9606	Homo sapiens	Cxcl12		R-HSA-8954207;R-HSA-8954199
R-HSA-199977	ER to Golgi Anterograde Transport	4	164	0.0114918	0.661916	0.668153	17	39	0.0028725	9606	Homo sapiens	Tuba1b;Ctsz;Arfgap3;Cog7		R-HSA-6807877;R-HSA-6807875;R-HSA-5694418;R-HSA-203973;R-HSA-5694417;R-HSA-6809006;R-HSA-5694527;R-HSA-5694428;R-HSA-204008;R-HSA-6809003;R-HSA-5694522;R-HSA-5694439;R-HSA-6809011;R-HSA-6809010;R-HSA-5694446;R-HSA-5694441;R-HSA-5694409
R-HSA-202424	Downstream TCR signaling	3	124	0.00868895	0.664282	0.668153	1	24	0.0017677	9606	Homo sapiens	H2-Eb1;H2-Aa;H2-Ab1		R-HSA-202307
R-HSA-167287	HIV elongation arrest and recovery	1	40	0.00280289	0.668153	0.668153	3	3	0.000220962	9606	Homo sapiens	Ccnt1		R-HSA-167284;R-HSA-167288;R-HSA-167481
R-HSA-159230	Transport of the SLBP Dependant Mature mRNA	1	40	0.00280289	0.668153	0.668153	3	3	0.000220962	9606	Homo sapiens	Nup160		R-HSA-77587;R-HSA-159046;R-HSA-159050
R-HSA-167290	Pausing and recovery of HIV elongation	1	40	0.00280289	0.668153	0.668153	2	2	0.000147308	9606	Homo sapiens	Ccnt1		R-HSA-167282;R-HSA-167292
R-HSA-68616	Assembly of the ORC complex at the origin of replication	1	40	0.00280289	0.668153	0.668153	4	11	0.000810194	9606	Homo sapiens	Orc6		R-HSA-68615;R-HSA-9734670;R-HSA-9734687;R-HSA-9734713
R-HSA-1482788	Acyl chain remodelling of PC	1	40	0.00280289	0.668153	0.668153	2	9	0.000662886	9606	Homo sapiens	Pla2g4a		R-HSA-1482862;R-HSA-1482856
R-HSA-170822	Regulation of Glucokinase by Glucokinase Regulatory Protein	1	40	0.00280289	0.668153	0.668153	1	5	0.00036827	9606	Homo sapiens	Nup160		R-HSA-170796
R-HSA-5696394	DNA Damage Recognition in GG-NER	1	40	0.00280289	0.668153	0.668153	1	5	0.00036827	9606	Homo sapiens	Ino80d		R-HSA-5691006
R-HSA-163359	Glucagon signaling in metabolic regulation	1	40	0.00280289	0.668153	0.668153	1	6	0.000441924	9606	Homo sapiens	Gng8;Dact3		R-HSA-825631
R-HSA-114508	Effects of PIP2 hydrolysis	1	40	0.00280289	0.668153	0.668153	1	9	0.000662886	9606	Homo sapiens	Mgl2;Mgll		R-HSA-426043
R-HSA-3858494	Beta-catenin independent WNT signaling	4	166	0.011632	0.671116	0.671116	15	51	0.00375635	9606	Homo sapiens	Fzd2;Camk2a;Gng8;Dact3		R-HSA-5099886;R-HSA-4332358;R-HSA-5140747;R-HSA-4332359;R-HSA-4332356;R-HSA-4332388;R-HSA-4332363;R-HSA-5140741;R-HSA-398193;R-HSA-3965444;R-HSA-3965446;R-HSA-3965447;R-HSA-3965441;R-HSA-398040;R-HSA-4608825
R-HSA-5173214	O-glycosylation of TSR domain-containing proteins	1	41	0.00287296	0.677192	0.677192	2	2	0.000147308	9606	Homo sapiens	Adamts15		R-HSA-5173005;R-HSA-5173192
R-HSA-180746	Nuclear import of Rev protein	1	41	0.00287296	0.677192	0.677192	2	7	0.000515578	9606	Homo sapiens	Nup160		R-HSA-180710;R-HSA-180732
R-HSA-190861	Gap junction assembly	1	41	0.00287296	0.677192	0.677192	3	16	0.00117846	9606	Homo sapiens	Tuba1b		R-HSA-190520;R-HSA-191737;R-HSA-190877
R-HSA-5673000	RAF activation	1	41	0.00287296	0.677192	0.677192	1	12	0.000883848	9606	Homo sapiens	Camk2a		R-HSA-5672969
R-HSA-202131	Metabolism of nitric oxide: NOS3 activation and regulation	1	41	0.00287296	0.677192	0.677192	2	26	0.001915	9606	Homo sapiens	Cygb		R-HSA-5340226;R-HSA-5340214
R-HSA-4420097	VEGFA-VEGFR2 Pathway	3	127	0.00889917	0.679906	0.679906	10	79	0.00581866	9606	Homo sapiens	Ncf1;Akt3;Bcar1		R-HSA-2317314;R-HSA-5218828;R-HSA-198640;R-HSA-5218811;R-HSA-5218827;R-HSA-5218841;R-HSA-5218855;R-HSA-5218839;R-HSA-5218822;R-HSA-198270
R-HSA-5358351	Signaling by Hedgehog	4	168	0.0117721	0.680142	0.680142	5	82	0.00603963	9606	Homo sapiens	Tuba1b;Iqce;Gas1;Efcab7		R-HSA-5610733;R-HSA-5632668;R-HSA-5610767;R-HSA-5632649;R-HSA-5633051
R-HSA-416482	G alpha (12/13) signalling events	2	86	0.00602621	0.68551	0.68551	4	15	0.00110481	9606	Homo sapiens	Gng8;Dact3		R-HSA-751019;R-HSA-751039;R-HSA-751027;R-HSA-751029
R-HSA-6783783	Interleukin-10 signaling	2	86	0.00602621	0.68551	0.68551	1	15	0.00110481	9606	Homo sapiens	Ccl19		R-HSA-6784160
R-HSA-3301854	Nuclear Pore Complex (NPC) Disassembly	1	42	0.00294303	0.685986	0.685986	2	2	0.000147308	9606	Homo sapiens	Nup160		R-HSA-2990880;R-HSA-2990882
R-HSA-1482839	Acyl chain remodelling of PE	1	42	0.00294303	0.685986	0.685986	2	9	0.000662886	9606	Homo sapiens	Pla2g4a		R-HSA-1482884;R-HSA-1482828
R-HSA-3296482	Defects in vitamin and cofactor metabolism	1	42	0.00294303	0.685986	0.685986	2	21	0.00154673	9606	Homo sapiens	Btd		R-HSA-3325540;R-HSA-4225086
R-HSA-110328	Recognition and association of DNA glycosylase with site containing an affected pyrimidine	1	42	0.00294303	0.685986	0.685986	1	21	0.00154673	9606	Homo sapiens	Pot1a		R-HSA-9629372
R-HSA-1655829	Regulation of cholesterol biosynthesis by SREBP (SREBF)	2	87	0.00609628	0.691583	0.691583	2	52	0.00383001	9606	Homo sapiens	Ggps1		R-HSA-1655832;R-HSA-2426161
R-HSA-170834	Signaling by TGF-beta Receptor Complex	2	87	0.00609628	0.691583	0.691583	3	88	0.00648155	9606	Homo sapiens	Ccnt1;Pmepa1		R-HSA-2187355;R-HSA-2176475;R-HSA-2187358
R-HSA-9696264	RND3 GTPase cycle	1	43	0.0030131	0.69454	0.69454	1	2	0.000147308	9606	Homo sapiens	Ckb		R-HSA-9696268
R-HSA-3232142	SUMOylation of ubiquitinylation proteins	1	43	0.0030131	0.69454	0.69454	1	3	0.000220962	9606	Homo sapiens	Nup160		R-HSA-5228523
R-HSA-111933	Calmodulin induced events	1	43	0.0030131	0.69454	0.69454	2	23	0.00169404	9606	Homo sapiens	Camk2a		R-HSA-442725;R-HSA-9617583
R-HSA-111997	CaM pathway	1	43	0.0030131	0.69454	0.69454	2	24	0.0017677	9606	Homo sapiens	Camk2a		R-HSA-442725;R-HSA-9617583
R-HSA-69205	G1/S-Specific Transcription	1	43	0.0030131	0.69454	0.69454	2	28	0.00206231	9606	Homo sapiens	Lin54		R-HSA-8961665;R-HSA-8961619
R-HSA-6804757	Regulation of TP53 Degradation	1	43	0.0030131	0.69454	0.69454	1	30	0.00220962	9606	Homo sapiens	Akt3		R-HSA-198599
R-HSA-8941326	RUNX2 regulates bone development	1	43	0.0030131	0.69454	0.69454	1	32	0.00235693	9606	Homo sapiens	Hes1		R-HSA-9008177
R-HSA-9682385	FLT3 signaling in disease	1	43	0.0030131	0.69454	0.69454	1	52	0.00383001	9606	Homo sapiens	Flt3l		R-HSA-9706356
R-HSA-195721	Signaling by WNT	8	332	0.023264	0.695415	0.695415	29	157	0.0115637	9606	Homo sapiens	Sfrp2;Fzd2;Camk2a;Peg12;Sox17;Gng8;Cxxc4;Dact3		R-HSA-4332358;R-HSA-5140747;R-HSA-4332359;R-HSA-4332356;R-HSA-4332363;R-HSA-5140741;R-HSA-201677;R-HSA-195283;R-HSA-195287;R-HSA-201685;R-HSA-5323526;R-HSA-5368582;R-HSA-201691;R-HSA-5665608;R-HSA-398040;R-HSA-3772441;R-HSA-5099886;R-HSA-195300;R-HSA-4332388;R-HSA-1504188;R-HSA-1504186;R-HSA-1458875;R-HSA-5626938;R-HSA-398193;R-HSA-3965444;R-HSA-3965446;R-HSA-3965447;R-HSA-3965441;R-HSA-4608825
R-HSA-2995410	Nuclear Envelope (NE) Reassembly	2	88	0.00616635	0.697559	0.697559	7	24	0.0017677	9606	Homo sapiens	Tuba1b;Nup160		R-HSA-9668419;R-HSA-9615937;R-HSA-9634219;R-HSA-9618378;R-HSA-9634169;R-HSA-9615945;R-HSA-9615901
R-HSA-418555	G alpha (s) signalling events	4	172	0.0120524	0.697673	0.697673	5	18	0.00132577	9606	Homo sapiens	Mc5r;Gnai2;Gng8;Dact3		R-HSA-379044;R-HSA-392129;R-HSA-744887;R-HSA-744886;R-HSA-751013
R-HSA-9007101	Rab regulation of trafficking	3	131	0.00917945	0.699891	0.699891	3	35	0.00257789	9606	Homo sapiens	Akt3;Tbc1d16;Sat1		R-HSA-8876193;R-HSA-8854604;R-HSA-8933446
R-HSA-453279	Mitotic G1 phase and G1/S transition	4	173	0.0121225	0.701947	0.701947	34	99	0.00729174	9606	Homo sapiens	Lin54;Orc6;Ccnd1;Akt3		R-HSA-1362261;R-HSA-8964492;R-HSA-8942607;R-HSA-8961665;R-HSA-8964482;R-HSA-1362270;R-HSA-68940;R-HSA-8941895;R-HSA-8941915;R-HSA-198613;R-HSA-8848414;R-HSA-8964498;R-HSA-8961619;R-HSA-8942803;R-HSA-68960;R-HSA-8964525;R-HSA-113638;R-HSA-9018017;R-HSA-8964513;R-HSA-69227;R-HSA-68914;R-HSA-8964475;R-HSA-8848436;R-HSA-68917;R-HSA-68916;R-HSA-68919;R-HSA-68918;R-HSA-8964465;R-HSA-8964531;R-HSA-18834…
R-HSA-933541	TRAF6 mediated IRF7 activation	1	44	0.00308318	0.702862	0.702862	7	13	0.000957502	9606	Homo sapiens	Rnf135		R-HSA-918230;R-HSA-933527;R-HSA-933525;R-HSA-933538;R-HSA-9705145;R-HSA-9705323;R-HSA-933537
R-HSA-212300	PRC2 methylates histones and DNA	1	44	0.00308318	0.702862	0.702862	2	4	0.000294616	9606	Homo sapiens	Jarid2		R-HSA-212263;R-HSA-212252
R-HSA-180910	Vpr-mediated nuclear import of PICs	1	44	0.00308318	0.702862	0.702862	1	2	0.000147308	9606	Homo sapiens	Nup160		R-HSA-180622
R-HSA-9696270	RND2 GTPase cycle	1	44	0.00308318	0.702862	0.702862	1	2	0.000147308	9606	Homo sapiens	Plxnd1		R-HSA-9696266
R-HSA-381771	Synthesis, secretion, and inactivation of Glucagon-like Peptide-1 (GLP-1)	1	44	0.00308318	0.702862	0.702862	2	7	0.000515578	9606	Homo sapiens	Fap		R-HSA-9023633;R-HSA-9023632
R-HSA-5218920	VEGFR2 mediated vascular permeability	1	44	0.00308318	0.702862	0.702862	3	15	0.00110481	9606	Homo sapiens	Akt3		R-HSA-2317314;R-HSA-198640;R-HSA-198270
R-HSA-3769402	Deactivation of the beta-catenin transactivating complex	1	44	0.00308318	0.702862	0.702862	2	14	0.00103116	9606	Homo sapiens	Sox17		R-HSA-5665608;R-HSA-5626938
R-HSA-9663891	Selective autophagy	2	89	0.00623642	0.703439	0.703439	13	48	0.00353539	9606	Homo sapiens	Tuba1b;Arl13b		R-HSA-9640114;R-HSA-9639698;R-HSA-9646354;R-HSA-9646679;R-HSA-9641111;R-HSA-9646390;R-HSA-9641109;R-HSA-9646685;R-HSA-9641127;R-HSA-9646347;R-HSA-9641096;R-HSA-9646383;R-HSA-9646348
R-HSA-73864	RNA Polymerase I Transcription	2	89	0.00623642	0.703439	0.703439	3	14	0.00103116	9606	Homo sapiens	Chd3;Ptrf		R-HSA-74993;R-HSA-74992;R-HSA-73739
R-HSA-201681	TCF dependent signaling in response to WNT	5	216	0.0151356	0.709985	0.709985	11	71	0.00522943	9606	Homo sapiens	Sfrp2;Fzd2;Peg12;Sox17;Cxxc4		R-HSA-3772441;R-HSA-201685;R-HSA-5323526;R-HSA-5368582;R-HSA-201691;R-HSA-1504188;R-HSA-1504186;R-HSA-1458875;R-HSA-5665608;R-HSA-201677;R-HSA-5626938
R-HSA-110331	Cleavage of the damaged purine	1	45	0.00315325	0.710958	0.710958	2	9	0.000662886	9606	Homo sapiens	Pot1a		R-HSA-9629216;R-HSA-9629483
R-HSA-165054	Rev-mediated nuclear export of HIV RNA	1	45	0.00315325	0.710958	0.710958	2	10	0.00073654	9606	Homo sapiens	Nup160		R-HSA-165043;R-HSA-165047
R-HSA-2500257	Resolution of Sister Chromatid Cohesion	3	134	0.00938967	0.714249	0.714249	4	8	0.000589232	9606	Homo sapiens	Cenpq;Tuba1b;Nup160		R-HSA-2484822;R-HSA-1638803;R-HSA-2468287;R-HSA-1638821
R-HSA-157118	Signaling by NOTCH	6	259	0.0181487	0.718285	0.718285	16	154	0.0113427	9606	Homo sapiens	Plxnd1;Ccnd1;Mib2;Hes1		R-HSA-2976716;R-HSA-9021451;R-HSA-9021450;R-HSA-9013069;R-HSA-9021325;R-HSA-9013711;R-HSA-2172172;R-HSA-1980047;R-HSA-1980074;R-HSA-9013567;R-HSA-4395227;R-HSA-4396347;R-HSA-1912359;R-HSA-2197562;R-HSA-1912416;R-HSA-9013652
R-HSA-159231	Transport of Mature mRNA Derived from an Intronless Transcript	1	46	0.00322332	0.718834	0.718834	3	3	0.000220962	9606	Homo sapiens	Nup160		R-HSA-158441;R-HSA-77594;R-HSA-158447
R-HSA-73927	Depurination	1	46	0.00322332	0.718834	0.718834	4	19	0.00139943	9606	Homo sapiens	Pot1a		R-HSA-9629216;R-HSA-9629483;R-HSA-9629195;R-HSA-9629373
R-HSA-168276	NS1 Mediated Effects on Host Pathways	1	46	0.00322332	0.718834	0.718834	1	6	0.000441924	9606	Homo sapiens	Nup160		R-HSA-1176059
R-HSA-5213460	RIPK1-mediated regulated necrosis	1	46	0.00322332	0.718834	0.718834	3	34	0.00250424	9606	Homo sapiens	Tnfsf10		R-HSA-3465429;R-HSA-5675456;R-HSA-5213462
R-HSA-749476	RNA Polymerase III Abortive And Retractive Initiation	1	46	0.00322332	0.718834	0.718834	1	13	0.000957502	9606	Homo sapiens	Nfix		R-HSA-113454
R-HSA-74158	RNA Polymerase III Transcription	1	46	0.00322332	0.718834	0.718834	1	25	0.00184135	9606	Homo sapiens	Nfix		R-HSA-113454
R-HSA-6806003	Regulation of TP53 Expression and Degradation	1	46	0.00322332	0.718834	0.718834	1	35	0.00257789	9606	Homo sapiens	Akt3		R-HSA-198599
R-HSA-5663202	Diseases of signal transduction by growth factor receptors and second messengers	12	498	0.0348959	0.719428	0.719428	28	484	0.0356485	9606	Homo sapiens	Camk2a;Akt3;Lrrfip1;Mib2;Hes1;Flt3l;Irs2;Rrbp1;Papss1;Pik3cd;Esr2		R-HSA-9700181;R-HSA-6802916;R-HSA-1839065;R-HSA-2769007;R-HSA-9700179;R-HSA-9656212;R-HSA-6802927;R-HSA-6802924;R-HSA-6802935;R-HSA-6802934;R-HSA-2220979;R-HSA-6802933;R-HSA-6802932;R-HSA-6802941;R-HSA-9706356;R-HSA-1839100;R-HSA-1839039;R-HSA-1839098;R-HSA-2737728;R-HSA-1839094;R-HSA-1839031;R-HSA-4396392;R-HSA-2400009;R-HSA-2400010;R-HSA-1839091;R-HSA-2900765;R-HSA-1839080;R-HSA-1839078
R-HSA-9013404	RAC2 GTPase cycle	2	92	0.00644664	0.720511	0.720511	2	10	0.00073654	9606	Homo sapiens	Syde1;Ncf1		R-HSA-9014424;R-HSA-9014295
R-HSA-9013694	Signaling by NOTCH4	2	92	0.00644664	0.720511	0.720511	1	20	0.00147308	9606	Homo sapiens	Hes1		R-HSA-9013711
R-HSA-6802957	Oncogenic MAPK signaling	2	93	0.00651671	0.726015	0.726015	9	46	0.00338808	9606	Homo sapiens	Camk2a;Papss1		R-HSA-6802935;R-HSA-6802934;R-HSA-6802933;R-HSA-6802916;R-HSA-6802932;R-HSA-9656212;R-HSA-6802927;R-HSA-6802941;R-HSA-6802924
R-HSA-6794362	Protein-protein interactions at synapses	2	93	0.00651671	0.726015	0.726015	5	33	0.00243058	9606	Homo sapiens	Shank3;Podn		R-HSA-6797974;R-HSA-6794357;R-HSA-6797554;R-HSA-6794351;R-HSA-6794344
R-HSA-159234	Transport of Mature mRNAs Derived from Intronless Transcripts	1	47	0.00329339	0.726496	0.726496	9	9	0.000662886	9606	Homo sapiens	Nup160		R-HSA-77587;R-HSA-158481;R-HSA-159046;R-HSA-158484;R-HSA-159050;R-HSA-158441;R-HSA-77594;R-HSA-158447;R-HSA-111439
R-HSA-177243	Interactions of Rev with host cellular proteins	1	47	0.00329339	0.726496	0.726496	4	16	0.00117846	9606	Homo sapiens	Nup160		R-HSA-165043;R-HSA-180710;R-HSA-165047;R-HSA-180732
R-HSA-176033	Interactions of Vpr with host cellular proteins	1	47	0.00329339	0.726496	0.726496	1	4	0.000294616	9606	Homo sapiens	Nup160		R-HSA-180622
R-HSA-451927	Interleukin-2 family signaling	1	47	0.00329339	0.726496	0.726496	1	59	0.00434558	9606	Homo sapiens	Pik3cd		R-HSA-508247
R-HSA-69242	S Phase	4	180	0.012613	0.730645	0.730645	10	54	0.00397731	9606	Homo sapiens	Lin54;Orc6;Ccnd1;Akt3		R-HSA-75825;R-HSA-68944;R-HSA-75824;R-HSA-8848436;R-HSA-198613;R-HSA-8848414;R-HSA-188345;R-HSA-75820;R-HSA-75823;R-HSA-75822
R-HSA-141444	Amplification of signal from unattached kinetochores via a MAD2 inhibitory signal	2	94	0.00658678	0.731427	0.731427	4	4	0.000294616	9606	Homo sapiens	Cenpq;Nup160		R-HSA-141409;R-HSA-141431;R-HSA-141422;R-HSA-141439
R-HSA-141424	Amplification of signal from the kinetochores	2	94	0.00658678	0.731427	0.731427	4	4	0.000294616	9606	Homo sapiens	Cenpq;Nup160		R-HSA-141409;R-HSA-141431;R-HSA-141422;R-HSA-141439
R-HSA-975871	MyD88 cascade initiated on plasma membrane	2	94	0.00658678	0.731427	0.731427	9	58	0.00427193	9606	Homo sapiens	Bcam;Map3k8		R-HSA-5684261;R-HSA-451634;R-HSA-168166;R-HSA-5684275;R-HSA-451649;R-HSA-5684273;R-HSA-5684250;R-HSA-5684267;R-HSA-5684248
R-HSA-168176	Toll Like Receptor 5 (TLR5) Cascade	2	94	0.00658678	0.731427	0.731427	9	59	0.00434558	9606	Homo sapiens	Bcam;Map3k8		R-HSA-5684261;R-HSA-451634;R-HSA-168166;R-HSA-5684275;R-HSA-451649;R-HSA-5684273;R-HSA-5684250;R-HSA-5684267;R-HSA-5684248
R-HSA-168142	Toll Like Receptor 10 (TLR10) Cascade	2	94	0.00658678	0.731427	0.731427	9	59	0.00434558	9606	Homo sapiens	Bcam;Map3k8		R-HSA-5684261;R-HSA-451634;R-HSA-168166;R-HSA-5684275;R-HSA-451649;R-HSA-5684273;R-HSA-5684250;R-HSA-5684267;R-HSA-5684248
R-HSA-8876198	RAB GEFs exchange GTP for GDP on RABs	2	94	0.00658678	0.731427	0.731427	2	21	0.00154673	9606	Homo sapiens	Akt3;Sat1		R-HSA-8876193;R-HSA-8933446
R-HSA-194138	Signaling by VEGF	3	138	0.00966996	0.732563	0.732563	10	86	0.00633424	9606	Homo sapiens	Ncf1;Akt3;Bcar1		R-HSA-2317314;R-HSA-5218828;R-HSA-198640;R-HSA-5218811;R-HSA-5218827;R-HSA-5218841;R-HSA-5218855;R-HSA-5218839;R-HSA-5218822;R-HSA-198270
R-HSA-9670095	Inhibition of DNA recombination at telomere	1	48	0.00336346	0.73395	0.73395	3	4	0.000294616	9606	Homo sapiens	Pot1a		R-HSA-9670114;R-HSA-9670149;R-HSA-9670101
R-HSA-427389	ERCC6 (CSB) and EHMT2 (G9a) positively regulate rRNA expression	1	48	0.00336346	0.73395	0.73395	2	4	0.000294616	9606	Homo sapiens	Chd3		R-HSA-427404;R-HSA-427336
R-HSA-400508	Incretin synthesis, secretion, and inactivation	1	48	0.00336346	0.73395	0.73395	4	14	0.00103116	9606	Homo sapiens	Fap		R-HSA-9023627;R-HSA-9023626;R-HSA-9023633;R-HSA-9023632
R-HSA-168271	Transport of Ribonucleoproteins into the Host Nucleus	1	48	0.00336346	0.73395	0.73395	1	4	0.000294616	9606	Homo sapiens	Nup160		R-HSA-168337
R-HSA-381038	XBP1(S) activates chaperone genes	2	95	0.00665686	0.736749	0.736749	1	47	0.00346174	9606	Homo sapiens	Ddx11		R-HSA-1791116
R-HSA-418594	G alpha (i) signalling events	10	426	0.0298507	0.73721	0.73721	30	74	0.00545039	9606	Homo sapiens	Cxcl12;Camk2a;Gnai2;Gpr1;Gng8;S1pr3;Pla2g4a;Ccl19;Gpsm3;Dact3		R-HSA-392129;R-HSA-749454;R-HSA-167429;R-HSA-111881;R-HSA-111883;R-HSA-8982019;R-HSA-167433;R-HSA-392206;R-HSA-8982020;R-HSA-112271;R-HSA-392212;R-HSA-751001;R-HSA-420883;R-HSA-8964242;R-HSA-111898;R-HSA-749456;R-HSA-8964311;R-HSA-8964329;R-HSA-442725;R-HSA-8982637;R-HSA-170666;R-HSA-380073;R-HSA-170671;R-HSA-170674;R-HSA-167408;R-HSA-8982012;R-HSA-8982640;R-HSA-167419;R-HSA-170686;R-HSA-9617583
R-HSA-167200	Formation of HIV-1 elongation complex containing HIV-1 Tat	1	49	0.00343354	0.741201	0.741201	5	5	0.00036827	9606	Homo sapiens	Ccnt1		R-HSA-170706;R-HSA-167234;R-HSA-170704;R-HSA-167191;R-HSA-167196
R-HSA-5655302	Signaling by FGFR1 in disease	1	49	0.00343354	0.741201	0.741201	9	35	0.00257789	9606	Homo sapiens	Lrrfip1		R-HSA-1839100;R-HSA-1839039;R-HSA-1839080;R-HSA-1839065;R-HSA-1839098;R-HSA-1839094;R-HSA-1839078;R-HSA-1839031;R-HSA-1839091
R-HSA-9656223	Signaling by RAF1 mutants	1	49	0.00343354	0.741201	0.741201	1	7	0.000515578	9606	Homo sapiens	Camk2a		R-HSA-9656212
R-HSA-3000480	Scavenging by Class A Receptors	1	49	0.00343354	0.741201	0.741201	1	10	0.00073654	9606	Homo sapiens	Efcab7		R-HSA-2203480
R-HSA-5675221	Negative regulation of MAPK pathway	1	49	0.00343354	0.741201	0.741201	1	17	0.00125212	9606	Homo sapiens	Dusp2		R-HSA-5675373
R-HSA-438064	Post NMDA receptor activation events	2	96	0.00672693	0.74198	0.74198	8	39	0.0028725	9606	Homo sapiens	Tuba1b;Camk2a		R-HSA-445367;R-HSA-442725;R-HSA-9619542;R-HSA-9612085;R-HSA-442732;R-HSA-9618750;R-HSA-9617583;R-HSA-442760
R-HSA-447115	Interleukin-12 family signaling	2	96	0.00672693	0.74198	0.74198	3	114	0.00839655	9606	Homo sapiens	Sod3;Crlf1		R-HSA-8950504;R-HSA-8950731;R-HSA-8950771
R-HSA-74752	Signaling by Insulin receptor	2	97	0.006797	0.747122	0.747122	10	34	0.00250424	9606	Homo sapiens	Flt3l;Irs2		R-HSA-74737;R-HSA-74736;R-HSA-109699;R-HSA-74707;R-HSA-74711;R-HSA-109817;R-HSA-74712;R-HSA-74747;R-HSA-5686315;R-HSA-109823
R-HSA-167152	Formation of HIV elongation complex in the absence of HIV Tat	1	50	0.00350361	0.748254	0.748254	2	2	0.000147308	9606	Homo sapiens	Ccnt1		R-HSA-167077;R-HSA-167084
R-HSA-4615885	SUMOylation of DNA replication proteins	1	50	0.00350361	0.748254	0.748254	2	8	0.000589232	9606	Homo sapiens	Nup160		R-HSA-5228525;R-HSA-4655355
R-HSA-73762	RNA Polymerase I Transcription Initiation	1	50	0.00350361	0.748254	0.748254	1	6	0.000441924	9606	Homo sapiens	Chd3		R-HSA-73739
R-HSA-512988	Interleukin-3, Interleukin-5 and GM-CSF signaling	1	50	0.00350361	0.748254	0.748254	5	38	0.00279885	9606	Homo sapiens	Pik3cd		R-HSA-508247;R-HSA-879917;R-HSA-912629;R-HSA-914182;R-HSA-912627
R-HSA-174417	Telomere C-strand (Lagging Strand) Synthesis	1	51	0.00357368	0.755116	0.755116	15	18	0.00132577	9606	Homo sapiens	Pot1a		R-HSA-174438;R-HSA-174439;R-HSA-9668597;R-HSA-174441;R-HSA-174446;R-HSA-174447;R-HSA-174444;R-HSA-174445;R-HSA-174451;R-HSA-174448;R-HSA-174452;R-HSA-174427;R-HSA-174456;R-HSA-174425;R-HSA-176702
R-HSA-69236	G1 Phase	1	51	0.00357368	0.755116	0.755116	9	15	0.00110481	9606	Homo sapiens	Ccnd1		R-HSA-8941915;R-HSA-8942607;R-HSA-9018017;R-HSA-69227;R-HSA-8942803;R-HSA-1226094;R-HSA-8942836;R-HSA-1226095;R-HSA-8941895
R-HSA-69231	Cyclin D associated events in G1	1	51	0.00357368	0.755116	0.755116	9	15	0.00110481	9606	Homo sapiens	Ccnd1		R-HSA-8941915;R-HSA-8942607;R-HSA-9018017;R-HSA-69227;R-HSA-8942803;R-HSA-1226094;R-HSA-8942836;R-HSA-1226095;R-HSA-8941895
R-HSA-4570464	SUMOylation of RNA binding proteins	1	51	0.00357368	0.755116	0.755116	1	4	0.000294616	9606	Homo sapiens	Nup160		R-HSA-4570493
R-HSA-8854214	TBC/RABGAPs	1	51	0.00357368	0.755116	0.755116	1	14	0.00103116	9606	Homo sapiens	Tbc1d16		R-HSA-8854604
R-HSA-73621	Pyrimidine catabolism	1	51	0.00357368	0.755116	0.755116	1	17	0.00125212	9606	Homo sapiens	Nt5c3		R-HSA-109449
R-HSA-110329	Cleavage of the damaged pyrimidine	1	51	0.00357368	0.755116	0.755116	1	20	0.00147308	9606	Homo sapiens	Pot1a		R-HSA-9629497
R-HSA-73928	Depyrimidination	1	51	0.00357368	0.755116	0.755116	2	41	0.00301981	9606	Homo sapiens	Pot1a		R-HSA-9629497;R-HSA-9629372
R-HSA-5620912	Anchoring of the basal body to the plasma membrane	2	99	0.00693715	0.757144	0.757144	6	9	0.000662886	9606	Homo sapiens	Tctn1;Ttbk2		R-HSA-5626228;R-HSA-5626227;R-HSA-5626681;R-HSA-5617816;R-HSA-5626699;R-HSA-5638009
R-HSA-168898	Toll-like Receptor Cascades	4	188	0.0131736	0.760857	0.760857	26	185	0.013626	9606	Homo sapiens	Bcam;Map3k8;S100a9;S100a8		R-HSA-166082;R-HSA-5432849;R-HSA-2201316;R-HSA-451649;R-HSA-166091;R-HSA-2201322;R-HSA-5684250;R-HSA-166286;R-HSA-5684248;R-HSA-166284;R-HSA-2559414;R-HSA-2262775;R-HSA-166362;R-HSA-166363;R-HSA-2262777;R-HSA-168166;R-HSA-5684275;R-HSA-166119;R-HSA-5684273;R-HSA-937059;R-HSA-937022;R-HSA-5684261;R-HSA-451634;R-HSA-937079;R-HSA-166072;R-HSA-5684267
R-HSA-167246	Tat-mediated elongation of the HIV-1 transcript	1	52	0.00364375	0.761792	0.761792	8	8	0.000589232	9606	Homo sapiens	Ccnt1		R-HSA-170706;R-HSA-167234;R-HSA-170704;R-HSA-167191;R-HSA-167192;R-HSA-167196;R-HSA-167197;R-HSA-167181
R-HSA-167169	HIV Transcription Elongation	1	52	0.00364375	0.761792	0.761792	8	15	0.00110481	9606	Homo sapiens	Ccnt1		R-HSA-170706;R-HSA-167234;R-HSA-170704;R-HSA-167191;R-HSA-167192;R-HSA-167196;R-HSA-167197;R-HSA-167181
R-HSA-190828	Gap junction trafficking	1	52	0.00364375	0.761792	0.761792	3	20	0.00147308	9606	Homo sapiens	Tuba1b		R-HSA-190520;R-HSA-191737;R-HSA-190877
R-HSA-2142691	Synthesis of Leukotrienes (LT) and Eoxins (EX)	1	52	0.00364375	0.761792	0.761792	1	19	0.00139943	9606	Homo sapiens	Dpep2		R-HSA-266012
R-HSA-1614558	Degradation of cysteine and homocysteine	1	52	0.00364375	0.761792	0.761792	1	23	0.00169404	9606	Homo sapiens	Csad		R-HSA-1655443
R-HSA-168928	DDX58/IFIH1-mediated induction of interferon-alpha/beta	2	100	0.00700722	0.762025	0.762025	29	53	0.00390366	9606	Homo sapiens	Bcam;Rnf135		R-HSA-168909;R-HSA-990528;R-HSA-933532;R-HSA-933530;R-HSA-936475;R-HSA-918232;R-HSA-933528;R-HSA-933526;R-HSA-918230;R-HSA-933527;R-HSA-918229;R-HSA-933525;R-HSA-918227;R-HSA-933523;R-HSA-918224;R-HSA-918225;R-HSA-168934;R-HSA-168166;R-HSA-9705137;R-HSA-933538;R-HSA-933539;R-HSA-9705145;R-HSA-933537;R-HSA-990526;R-HSA-937343;R-HSA-936381;R-HSA-936378;R-HSA-9705320;R-HSA-9705323
R-HSA-9013423	RAC3 GTPase cycle	2	100	0.00700722	0.762025	0.762025	2	6	0.000441924	9606	Homo sapiens	Syde1;Ncf1		R-HSA-9018808;R-HSA-9018806
R-HSA-71406	Pyruvate metabolism and Citric Acid (TCA) cycle	2	100	0.00700722	0.762025	0.762025	4	36	0.00265154	9606	Homo sapiens	Slc16a3;Pdk2		R-HSA-373875;R-HSA-203946;R-HSA-373867;R-HSA-9011543
R-HSA-163685	Integration of energy metabolism	3	145	0.0101605	0.762374	0.762374	10	62	0.00456655	9606	Homo sapiens	Gnai2;Gng8;Dact3		R-HSA-825631;R-HSA-400037;R-HSA-422320;R-HSA-400097;R-HSA-400046;R-HSA-381612;R-HSA-400063;R-HSA-400092;R-HSA-265166;R-HSA-381706
R-HSA-112314	Neurotransmitter receptors and postsynaptic signal transmission	5	232	0.0162567	0.76592	0.76592	28	109	0.00802828	9606	Homo sapiens	Tuba1b;Camk2a;Gnai2;Gng8;Dact3		R-HSA-9619542;R-HSA-416320;R-HSA-392206;R-HSA-442760;R-HSA-9610627;R-HSA-1013020;R-HSA-438037;R-HSA-1013013;R-HSA-1013012;R-HSA-432164;R-HSA-442725;R-HSA-432162;R-HSA-9612085;R-HSA-170666;R-HSA-500717;R-HSA-442732;R-HSA-432172;R-HSA-9619449;R-HSA-9618750;R-HSA-170671;R-HSA-170674;R-HSA-445367;R-HSA-9610408;R-HSA-9611368;R-HSA-9614185;R-HSA-170686;R-HSA-9617326;R-HSA-9617583
R-HSA-975138	TRAF6 mediated induction of NFkB and MAP kinases upon TLR7/8 or 9 activation	2	101	0.00707729	0.766821	0.766821	9	48	0.00353539	9606	Homo sapiens	Bcam;Map3k8		R-HSA-5684261;R-HSA-451634;R-HSA-168166;R-HSA-5684275;R-HSA-451649;R-HSA-5684273;R-HSA-5684250;R-HSA-5684267;R-HSA-5684248
R-HSA-381070	IRE1alpha activates chaperones	2	101	0.00707729	0.766821	0.766821	1	53	0.00390366	9606	Homo sapiens	Ddx11		R-HSA-1791116
R-HSA-168333	NEP/NS2 Interacts with the Cellular Export Machinery	1	53	0.00371383	0.768286	0.768286	1	2	0.000147308	9606	Homo sapiens	Nup160		R-HSA-168880
R-HSA-3214858	RMTs methylate histone arginines	1	53	0.00371383	0.768286	0.768286	6	22	0.00162039	9606	Homo sapiens	Ccnd1		R-HSA-3215426;R-HSA-5216234;R-HSA-5205799;R-HSA-3215385;R-HSA-5205861;R-HSA-5661117
R-HSA-76009	Platelet Aggregation (Plug Formation)	1	53	0.00371383	0.768286	0.768286	3	27	0.00198866	9606	Homo sapiens	Bcar1		R-HSA-372693;R-HSA-372705;R-HSA-372697
R-HSA-1489509	DAG and IP3 signaling	1	53	0.00371383	0.768286	0.768286	2	28	0.00206231	9606	Homo sapiens	Camk2a		R-HSA-442725;R-HSA-9617583
R-HSA-202403	TCR signaling	3	147	0.0103006	0.770381	0.770381	13	52	0.00383001	9606	Homo sapiens	H2-Eb1;H2-Aa;H2-Ab1		R-HSA-202307;R-HSA-202214;R-HSA-202245;R-HSA-202248;R-HSA-202216;R-HSA-202344;R-HSA-8852200;R-HSA-202291;R-HSA-8855381;R-HSA-202165;R-HSA-202233;R-HSA-202168;R-HSA-202174
R-HSA-8878166	Transcriptional regulation by RUNX2	3	147	0.0103006	0.770381	0.770381	3	84	0.00618693	9606	Homo sapiens	Ccnd1;Akt3;Hes1		R-HSA-8939963;R-HSA-9008412;R-HSA-9008177
R-HSA-168164	Toll Like Receptor 3 (TLR3) Cascade	2	102	0.00714736	0.771532	0.771532	9	61	0.00449289	9606	Homo sapiens	Bcam;Map3k8		R-HSA-5684261;R-HSA-451634;R-HSA-168166;R-HSA-5684275;R-HSA-451649;R-HSA-5684273;R-HSA-5684250;R-HSA-5684267;R-HSA-5684248
R-HSA-975155	MyD88 dependent cascade initiated on endosome	2	102	0.00714736	0.771532	0.771532	9	63	0.0046402	9606	Homo sapiens	Bcam;Map3k8		R-HSA-5684261;R-HSA-451634;R-HSA-168166;R-HSA-5684275;R-HSA-451649;R-HSA-5684273;R-HSA-5684250;R-HSA-5684267;R-HSA-5684248
R-HSA-8856688	Golgi-to-ER retrograde transport	3	148	0.0103707	0.774301	0.774301	7	18	0.00132577	9606	Homo sapiens	Tuba1b;Arfgap3;Pla2g4a		R-HSA-8849350;R-HSA-8848484;R-HSA-6811426;R-HSA-6811423;R-HSA-6811418;R-HSA-8849353;R-HSA-6811417
R-HSA-75815	Ubiquitin-dependent degradation of Cyclin D	1	54	0.0037839	0.774603	0.774603	5	5	0.00036827	9606	Homo sapiens	Ccnd1		R-HSA-75825;R-HSA-75824;R-HSA-75820;R-HSA-75823;R-HSA-75822
R-HSA-606279	Deposition of new CENPA-containing nucleosomes at the centromere	1	54	0.0037839	0.774603	0.774603	4	4	0.000294616	9606	Homo sapiens	Cenpq		R-HSA-606349;R-HSA-606287;R-HSA-606289;R-HSA-606326
R-HSA-774815	Nucleosome assembly	1	54	0.0037839	0.774603	0.774603	4	4	0.000294616	9606	Homo sapiens	Cenpq		R-HSA-606349;R-HSA-606287;R-HSA-606289;R-HSA-606326
R-HSA-168274	Export of Viral Ribonucleoproteins from Nucleus	1	54	0.0037839	0.774603	0.774603	1	5	0.00036827	9606	Homo sapiens	Nup160		R-HSA-168880
R-HSA-9649948	Signaling downstream of RAS mutants	1	54	0.0037839	0.774603	0.774603	1	7	0.000515578	9606	Homo sapiens	Camk2a		R-HSA-6802924
R-HSA-6802955	Paradoxical activation of RAF signaling by kinase inactive BRAF	1	54	0.0037839	0.774603	0.774603	1	7	0.000515578	9606	Homo sapiens	Camk2a		R-HSA-6802941
R-HSA-6802946	Signaling by moderate kinase activity BRAF mutants	1	54	0.0037839	0.774603	0.774603	1	7	0.000515578	9606	Homo sapiens	Camk2a		R-HSA-6802916
R-HSA-6802949	Signaling by RAS mutants	1	54	0.0037839	0.774603	0.774603	1	9	0.000662886	9606	Homo sapiens	Camk2a		R-HSA-6802924
R-HSA-1257604	PIP3 activates AKT signaling	7	319	0.022353	0.775975	0.775975	24	86	0.00633424	9606	Homo sapiens	Rest;Chd3;Akt3;Flt3l;Irs2;Pik3cd;Esr2		R-HSA-199299;R-HSA-8944104;R-HSA-198371;R-HSA-199298;R-HSA-2317314;R-HSA-6807077;R-HSA-199425;R-HSA-198599;R-HSA-198347;R-HSA-200143;R-HSA-8943780;R-HSA-199443;R-HSA-198611;R-HSA-2316434;R-HSA-198609;R-HSA-198640;R-HSA-199863;R-HSA-198613;R-HSA-2317332;R-HSA-198298;R-HSA-199839;R-HSA-8948757;R-HSA-198270;R-HSA-198621
R-HSA-168181	Toll Like Receptor 7/8 (TLR7/8) Cascade	2	103	0.00721743	0.776161	0.776161	9	66	0.00486116	9606	Homo sapiens	Bcam;Map3k8		R-HSA-5684261;R-HSA-451634;R-HSA-168166;R-HSA-5684275;R-HSA-451649;R-HSA-5684273;R-HSA-5684250;R-HSA-5684267;R-HSA-5684248
R-HSA-449147	Signaling by Interleukins	15	643	0.0450564	0.778084	0.778084	27	493	0.0363114	9606	Homo sapiens	Bcam;Ccnd1;Mmp2;Il17re;Fscn1;Ccl19;Irs2;Map3k8;Sod3;Crlf1;Pik3cd		R-HSA-8950731;R-HSA-5678544;R-HSA-451649;R-HSA-6784160;R-HSA-6789615;R-HSA-914182;R-HSA-5684250;R-HSA-6783530;R-HSA-5684248;R-HSA-508247;R-HSA-6783670;R-HSA-8983003;R-HSA-8950504;R-HSA-879917;R-HSA-6783556;R-HSA-168166;R-HSA-5684275;R-HSA-5684273;R-HSA-5684261;R-HSA-6790036;R-HSA-451634;R-HSA-912629;R-HSA-8950771;R-HSA-5696490;R-HSA-5684267;R-HSA-6790041;R-HSA-912627
R-HSA-5663220	RHO GTPases Activate Formins	3	149	0.0104408	0.778167	0.778167	3	27	0.00198866	9606	Homo sapiens	Cenpq;Tuba1b;Nup160		R-HSA-5666160;R-HSA-5666129;R-HSA-5666169
R-HSA-8955332	Carboxyterminal post-translational modifications of tubulin	1	55	0.00385397	0.780749	0.780749	6	6	0.000441924	9606	Homo sapiens	Tuba1b		R-HSA-8955706;R-HSA-8955869;R-HSA-8955712;R-HSA-8865774;R-HSA-8867370;R-HSA-8866105
R-HSA-437239	Recycling pathway of L1	1	55	0.00385397	0.780749	0.780749	2	14	0.00103116	9606	Homo sapiens	Tuba1b		R-HSA-445077;R-HSA-445071
R-HSA-3928665	EPH-ephrin mediated repulsion of cells	1	55	0.00385397	0.780749	0.780749	1	9	0.000662886	9606	Homo sapiens	Mmp2		R-HSA-3928657
R-HSA-1483191	Synthesis of PC	1	55	0.00385397	0.780749	0.780749	1	18	0.00132577	9606	Homo sapiens	Ache		R-HSA-372519
R-HSA-983231	Factors involved in megakaryocyte development and platelet production	4	194	0.013594	0.781746	0.781746	6	43	0.00316712	9606	Homo sapiens	Maff;Ehd2;Tuba1b		R-HSA-1008220;R-HSA-983259;R-HSA-1011576;R-HSA-1008200;R-HSA-983266;R-HSA-1008240
R-HSA-109582	Hemostasis	19	803	0.056268	0.782034	0.782034	39	334	0.0246004	9606	Homo sapiens	Cd74;Clec3b;Mgl2;Tuba1b;Fam3c;Pla2g4a;Sod3;Dact3;Bcar1;Maff;Ehd2;Dok2;Apoh;Gnai2;Gng8;Slc16a3;Lgals3bp;Gas6;Mgll		R-HSA-396996;R-HSA-397891;R-HSA-392195;R-HSA-1008200;R-HSA-428750;R-HSA-428749;R-HSA-396941;R-HSA-397835;R-HSA-392202;R-HSA-372693;R-HSA-392852;R-HSA-418581;R-HSA-482772;R-HSA-1008220;R-HSA-983259;R-HSA-418579;R-HSA-202710;R-HSA-428752;R-HSA-418576;R-HSA-372697;R-HSA-392870;R-HSA-372705;R-HSA-428961;R-HSA-481007;R-HSA-204392;R-HSA-428909;R-HSA-983266;R-HSA-392874;R-HSA-428918;R-HSA-204850;R-HSA-4…
R-HSA-1236975	Antigen processing-Cross presentation	4	195	0.0136641	0.785083	0.785083	6	23	0.00169404	9606	Homo sapiens	Ncf1;Tap2;S100a9;S100a8		R-HSA-8863895;R-HSA-8951595;R-HSA-8863858;R-HSA-1236967;R-HSA-1236949;R-HSA-8863914
R-HSA-5620924	Intraflagellar transport	1	56	0.00392404	0.786727	0.786727	6	12	0.000883848	9606	Homo sapiens	Tuba1b		R-HSA-5624949;R-HSA-5625424;R-HSA-5625426;R-HSA-5625421;R-HSA-5624952;R-HSA-5625416
R-HSA-157858	Gap junction trafficking and regulation	1	56	0.00392404	0.786727	0.786727	3	24	0.0017677	9606	Homo sapiens	Tuba1b		R-HSA-190520;R-HSA-191737;R-HSA-190877
R-HSA-9031628	NGF-stimulated transcription	1	56	0.00392404	0.786727	0.786727	2	37	0.0027252	9606	Homo sapiens	Rest		R-HSA-9620723;R-HSA-9621054
R-HSA-168138	Toll Like Receptor 9 (TLR9) Cascade	2	106	0.00742765	0.789559	0.789559	9	68	0.00500847	9606	Homo sapiens	Bcam;Map3k8		R-HSA-5684261;R-HSA-451634;R-HSA-168166;R-HSA-5684275;R-HSA-451649;R-HSA-5684273;R-HSA-5684250;R-HSA-5684267;R-HSA-5684248
R-HSA-5687128	MAPK6/MAPK4 signaling	2	106	0.00742765	0.789559	0.789559	4	40	0.00294616	9606	Homo sapiens	Mmp2;Cdc14b		R-HSA-5692754;R-HSA-5692764;R-HSA-5692749;R-HSA-5687099
R-HSA-9006925	Intracellular signaling by second messengers	8	366	0.0256464	0.790328	0.790328	26	114	0.00839655	9606	Homo sapiens	Rest;Chd3;Camk2a;Akt3;Flt3l;Irs2;Pik3cd;Esr2		R-HSA-199299;R-HSA-199298;R-HSA-6807077;R-HSA-199425;R-HSA-198599;R-HSA-198347;R-HSA-200143;R-HSA-199443;R-HSA-198611;R-HSA-198609;R-HSA-198613;R-HSA-198298;R-HSA-199839;R-HSA-8948757;R-HSA-198621;R-HSA-8944104;R-HSA-198371;R-HSA-2317314;R-HSA-442725;R-HSA-8943780;R-HSA-2316434;R-HSA-198640;R-HSA-199863;R-HSA-2317332;R-HSA-9617583;R-HSA-198270
R-HSA-9013405	RHOD GTPase cycle	1	57	0.00399411	0.792543	0.792543	1	9	0.000662886	9606	Homo sapiens	Add3		R-HSA-9693198
R-HSA-5620920	Cargo trafficking to the periciliary membrane	1	57	0.00399411	0.792543	0.792543	2	27	0.00198866	9606	Homo sapiens	Arl13b		R-HSA-5638012;R-HSA-5624953
R-HSA-532668	N-glycan trimming in the ER and Calnexin/Calreticulin cycle	1	57	0.00399411	0.792543	0.792543	1	18	0.00132577	9606	Homo sapiens	C1qtnf1		R-HSA-8853379
R-HSA-2173793	Transcriptional activity of SMAD2/SMAD3:SMAD4 heterotrimer	1	57	0.00399411	0.792543	0.792543	1	44	0.00324077	9606	Homo sapiens	Ccnt1		R-HSA-2176475
R-HSA-6811434	COPI-dependent Golgi-to-ER retrograde traffic	2	107	0.00749772	0.793866	0.793866	4	11	0.000810194	9606	Homo sapiens	Tuba1b;Arfgap3		R-HSA-6811426;R-HSA-6811423;R-HSA-6811418;R-HSA-6811417
R-HSA-1296071	Potassium Channels	2	107	0.00749772	0.793866	0.793866	3	19	0.00139943	9606	Homo sapiens	Gng8;Dact3		R-HSA-1013020;R-HSA-1013013;R-HSA-1013012
R-HSA-937061	TRIF(TICAM1)-mediated TLR4 signaling	2	107	0.00749772	0.793866	0.793866	9	58	0.00427193	9606	Homo sapiens	Bcam;Map3k8		R-HSA-5684261;R-HSA-451634;R-HSA-168166;R-HSA-5684275;R-HSA-451649;R-HSA-5684273;R-HSA-5684250;R-HSA-5684267;R-HSA-5684248
R-HSA-166166	MyD88-independent TLR4 cascade	2	107	0.00749772	0.793866	0.793866	9	60	0.00441924	9606	Homo sapiens	Bcam;Map3k8		R-HSA-5684261;R-HSA-451634;R-HSA-168166;R-HSA-5684275;R-HSA-451649;R-HSA-5684273;R-HSA-5684250;R-HSA-5684267;R-HSA-5684248
R-HSA-9020702	Interleukin-1 signaling	2	109	0.00763787	0.802246	0.802246	9	47	0.00346174	9606	Homo sapiens	Bcam;Map3k8		R-HSA-5684261;R-HSA-451634;R-HSA-168166;R-HSA-5684275;R-HSA-451649;R-HSA-5684273;R-HSA-5684250;R-HSA-5684267;R-HSA-5684248
R-HSA-68827	CDT1 association with the CDC6:ORC:origin complex	1	59	0.00413426	0.803704	0.803704	1	3	0.000220962	9606	Homo sapiens	Orc6		R-HSA-68826
R-HSA-3371571	HSF1-dependent transactivation	1	59	0.00413426	0.803704	0.803704	1	8	0.000589232	9606	Homo sapiens	Camk2a		R-HSA-5082387
R-HSA-373752	Netrin-1 signaling	1	59	0.00413426	0.803704	0.803704	1	37	0.0027252	9606	Homo sapiens	Myo10		R-HSA-593672
R-HSA-70171	Glycolysis	2	110	0.00770794	0.806322	0.806322	2	24	0.0017677	9606	Homo sapiens	44443;Nup160		R-HSA-71802;R-HSA-170796
R-HSA-69618	Mitotic Spindle Checkpoint	2	111	0.00777801	0.810323	0.810323	4	7	0.000515578	9606	Homo sapiens	Cenpq;Nup160		R-HSA-141409;R-HSA-141431;R-HSA-141422;R-HSA-141439
R-HSA-428157	Sphingolipid metabolism	3	158	0.0110714	0.810558	0.810558	3	64	0.00471385	9606	Homo sapiens	Acer3;Sptssa;Gba2		R-HSA-428262;R-HSA-1861788;R-HSA-428127
R-HSA-9013148	CDC42 GTPase cycle	3	159	0.0111415	0.813899	0.813899	2	6	0.000441924	9606	Homo sapiens	Syde1;Fam13b;Arfgap3		R-HSA-9013161;R-HSA-9013157
R-HSA-1483255	PI Metabolism	2	112	0.00784808	0.814251	0.814251	7	89	0.0065552	9606	Homo sapiens	Pik3c2a;Pik3cd		R-HSA-1675961;R-HSA-1675928;R-HSA-1676024;R-HSA-1676109;R-HSA-1676206;R-HSA-1676048;R-HSA-1675939
R-HSA-5676590	NIK-->noncanonical NF-kB signaling	1	61	0.0042744	0.814266	0.814266	7	9	0.000662886	9606	Homo sapiens	Map3k14		R-HSA-5668545;R-HSA-5607725;R-HSA-5607726;R-HSA-5607721;R-HSA-5607720;R-HSA-5607723;R-HSA-5607722
R-HSA-432722	Golgi Associated Vesicle Biogenesis	1	61	0.0042744	0.814266	0.814266	4	7	0.000515578	9606	Homo sapiens	Pik3c2a		R-HSA-421831;R-HSA-421836;R-HSA-421835;R-HSA-421833
R-HSA-9012999	RHO GTPase cycle	10	460	0.0322332	0.815469	0.815469	22	91	0.00670251	9606	Homo sapiens	Syde1;Plxnd1;Fam13b;Ncf1;Tuba1b;Arl13b;Arfgap3;Ckb;Add3;Ptrf		R-HSA-9013161;R-HSA-9013024;R-HSA-9017507;R-HSA-9013157;R-HSA-9018758;R-HSA-9018745;R-HSA-9013145;R-HSA-9013144;R-HSA-9693282;R-HSA-9014424;R-HSA-9018808;R-HSA-9018746;R-HSA-9693125;R-HSA-9014449;R-HSA-9013009;R-HSA-9696266;R-HSA-9017488;R-HSA-9693198;R-HSA-9014295;R-HSA-9018806;R-HSA-9696268;R-HSA-9013110
R-HSA-442755	Activation of NMDA receptors and postsynaptic events	2	113	0.00791816	0.818106	0.818106	18	71	0.00522943	9606	Homo sapiens	Tuba1b;Camk2a		R-HSA-432164;R-HSA-442725;R-HSA-9619542;R-HSA-432162;R-HSA-9612085;R-HSA-442732;R-HSA-432172;R-HSA-9619449;R-HSA-9618750;R-HSA-442760;R-HSA-9610627;R-HSA-445367;R-HSA-438037;R-HSA-9610408;R-HSA-9611368;R-HSA-9614185;R-HSA-9617326;R-HSA-9617583
R-HSA-187577	SCF(Skp2)-mediated degradation of p27/p21	1	62	0.00434447	0.819333	0.819333	2	7	0.000515578	9606	Homo sapiens	Ccnd1		R-HSA-8848436;R-HSA-8848414
R-HSA-1221632	Meiotic synapsis	1	62	0.00434447	0.819333	0.819333	1	6	0.000441924	9606	Homo sapiens	Pot1a		R-HSA-912408
R-HSA-446203	Asparagine N-linked glycosylation	9	421	0.0295004	0.820513	0.820513	22	144	0.0106062	9606	Homo sapiens	St8sia6;Tuba1b;C1qtnf1;Ctsz;Kctd15;Arfgap3;Cog7;Fut4;St8sia1		R-HSA-6807877;R-HSA-8853379;R-HSA-6807875;R-HSA-5694418;R-HSA-203973;R-HSA-5694417;R-HSA-6809006;R-HSA-5694527;R-HSA-5694428;R-HSA-204008;R-HSA-6809003;R-HSA-4084978;R-HSA-5694522;R-HSA-5694439;R-HSA-5693925;R-HSA-6809011;R-HSA-6809010;R-HSA-6786034;R-HSA-5694446;R-HSA-1022133;R-HSA-5694441;R-HSA-5694409
R-HSA-112382	Formation of RNA Pol II elongation complex	1	63	0.00441455	0.824261	0.824261	2	2	0.000147308	9606	Homo sapiens	Ccnt1		R-HSA-112379;R-HSA-112381
R-HSA-73929	Base-Excision Repair, AP Site Formation	1	63	0.00441455	0.824261	0.824261	6	64	0.00471385	9606	Homo sapiens	Pot1a		R-HSA-9629216;R-HSA-9629483;R-HSA-9629195;R-HSA-9629497;R-HSA-9629372;R-HSA-9629373
R-HSA-9633012	Response of EIF2AK4 (GCN2) to amino acid deficiency	2	115	0.0080583	0.825601	0.825601	2	16	0.00117846	9606	Homo sapiens	Atf3		R-HSA-9635892;R-HSA-1791173
R-HSA-425366	Transport of bile salts and organic acids, metal ions and amine compounds	3	163	0.0114218	0.826768	0.826768	3	67	0.00493482	9606	Homo sapiens	Slc22a4;Slc16a3		R-HSA-549241;R-HSA-433698;R-HSA-549297
R-HSA-193648	NRAGE signals death through JNK	1	64	0.00448462	0.829056	0.829056	3	7	0.000515578	9606	Homo sapiens	Maged1		R-HSA-205115;R-HSA-204958;R-HSA-205132
R-HSA-5578775	Ion homeostasis	1	64	0.00448462	0.829056	0.829056	1	16	0.00117846	9606	Homo sapiens	Camk2a		R-HSA-427910
R-HSA-109606	Intrinsic Pathway for Apoptosis	1	64	0.00448462	0.829056	0.829056	1	62	0.00456655	9606	Homo sapiens	Akt3		R-HSA-198347
R-HSA-5617833	Cilium Assembly	4	210	0.0147152	0.830405	0.830405	16	50	0.0036827	9606	Homo sapiens	Tuba1b;Arl13b;Tctn1;Ttbk2		R-HSA-5624949;R-HSA-5626228;R-HSA-5625424;R-HSA-5626227;R-HSA-5625426;R-HSA-5638012;R-HSA-5626681;R-HSA-5624953;R-HSA-5618328;R-HSA-5624952;R-HSA-5617816;R-HSA-5618331;R-HSA-5638009;R-HSA-5625421;R-HSA-5625416;R-HSA-5626699
R-HSA-2980766	Nuclear Envelope Breakdown	1	65	0.00455469	0.83372	0.83372	2	13	0.000957502	9606	Homo sapiens	Nup160		R-HSA-2990880;R-HSA-2990882
R-HSA-1483166	Synthesis of PA	1	65	0.00455469	0.83372	0.83372	2	17	0.00125212	9606	Homo sapiens	Pla2g4a		R-HSA-1482656;R-HSA-1482604
R-HSA-429914	Deadenylation-dependent mRNA decay	1	65	0.00455469	0.83372	0.83372	1	10	0.00073654	9606	Homo sapiens	Edc3		R-HSA-429860
R-HSA-112315	Transmission across Chemical Synapses	7	343	0.0240348	0.834114	0.834114	31	163	0.0120056	9606	Homo sapiens	Ache;Tuba1b;Camk2a;Gnai2;Gng8;Sat1;Dact3		R-HSA-9634834;R-HSA-9619542;R-HSA-212614;R-HSA-416320;R-HSA-392206;R-HSA-442760;R-HSA-9610627;R-HSA-1013020;R-HSA-438037;R-HSA-1013013;R-HSA-1013012;R-HSA-372519;R-HSA-432164;R-HSA-442725;R-HSA-432162;R-HSA-9612085;R-HSA-170666;R-HSA-500717;R-HSA-442732;R-HSA-432172;R-HSA-9619449;R-HSA-9618750;R-HSA-170671;R-HSA-170674;R-HSA-445367;R-HSA-9610408;R-HSA-9611368;R-HSA-9614185;R-HSA-170686;R-HSA-9617…
R-HSA-5607761	Dectin-1 mediated noncanonical NF-kB signaling	1	66	0.00462476	0.838257	0.838257	6	9	0.000662886	9606	Homo sapiens	Map3k14		R-HSA-5607725;R-HSA-5607726;R-HSA-5607721;R-HSA-5607720;R-HSA-5607723;R-HSA-5607722
R-HSA-75955	RNA Polymerase II Transcription Elongation	1	66	0.00462476	0.838257	0.838257	5	8	0.000589232	9606	Homo sapiens	Ccnt1		R-HSA-112385;R-HSA-113412;R-HSA-112379;R-HSA-112381;R-HSA-112396
R-HSA-191859	snRNP Assembly	1	66	0.00462476	0.838257	0.838257	2	6	0.000441924	9606	Homo sapiens	Nup160		R-HSA-191825;R-HSA-191830
R-HSA-194441	Metabolism of non-coding RNA	1	66	0.00462476	0.838257	0.838257	2	6	0.000441924	9606	Homo sapiens	Nup160		R-HSA-191825;R-HSA-191830
R-HSA-4608870	Asymmetric localization of PCP proteins	1	66	0.00462476	0.838257	0.838257	2	7	0.000515578	9606	Homo sapiens	Fzd2		R-HSA-5099886;R-HSA-4608825
R-HSA-9725370	Signaling by ALK fusions and activated point mutants	1	66	0.00462476	0.838257	0.838257	2	29	0.00213597	9606	Homo sapiens	Rrbp1		R-HSA-9700181;R-HSA-9700179
R-HSA-9700206	Signaling by ALK in cancer	1	66	0.00462476	0.838257	0.838257	2	37	0.0027252	9606	Homo sapiens	Rrbp1		R-HSA-9700181;R-HSA-9700179
R-HSA-2672351	Stimuli-sensing channels	2	119	0.00833859	0.839765	0.839765	2	28	0.00206231	9606	Homo sapiens	Ano8;Sgk3		R-HSA-2682349;R-HSA-2684901
R-HSA-2142753	Arachidonic acid metabolism	3	168	0.0117721	0.841778	0.841778	4	77	0.00567136	9606	Homo sapiens	Cyp2u1;Dpep2;Pla2g4a		R-HSA-2161940;R-HSA-2161814;R-HSA-266012;R-HSA-111883
R-HSA-983189	Kinesins	1	68	0.00476491	0.846964	0.846964	2	14	0.00103116	9606	Homo sapiens	Tuba1b		R-HSA-983259;R-HSA-983266
R-HSA-1227986	Signaling by ERBB2	1	68	0.00476491	0.846964	0.846964	1	46	0.00338808	9606	Homo sapiens	Akt3		R-HSA-1358791
R-HSA-6807070	PTEN Regulation	3	171	0.0119823	0.850235	0.850235	4	56	0.00412462	9606	Homo sapiens	Rest;Chd3;Akt3		R-HSA-8944104;R-HSA-6807077;R-HSA-8943780;R-HSA-8948757
R-HSA-156580	Phase II - Conjugation of compounds	5	263	0.018429	0.850477	0.850477	5	72	0.00530309	9606	Homo sapiens	Tpst1;Gstt2;Sat1;Papss1		R-HSA-176054;R-HSA-427555;R-HSA-174389;R-HSA-174392;R-HSA-8954262
R-HSA-180786	Extension of Telomeres	1	69	0.00483498	0.851141	0.851141	23	28	0.00206231	9606	Homo sapiens	Pot1a		R-HSA-174438;R-HSA-174439;R-HSA-9668597;R-HSA-9686521;R-HSA-174441;R-HSA-164617;R-HSA-174446;R-HSA-174447;R-HSA-174444;R-HSA-164620;R-HSA-174445;R-HSA-9686524;R-HSA-163090;R-HSA-174451;R-HSA-174448;R-HSA-163120;R-HSA-174452;R-HSA-163099;R-HSA-174427;R-HSA-174456;R-HSA-163096;R-HSA-174425;R-HSA-176702
R-HSA-450294	MAP kinase activation	1	69	0.00483498	0.851141	0.851141	8	32	0.00235693	9606	Homo sapiens	Map3k8		R-HSA-5684261;R-HSA-451634;R-HSA-5684275;R-HSA-451649;R-HSA-5684273;R-HSA-5684250;R-HSA-5684267;R-HSA-5684248
R-HSA-352230	Amino acid transport across the plasma membrane	1	69	0.00483498	0.851141	0.851141	1	36	0.00265154	9606	Homo sapiens	Sat1		R-HSA-352119
R-HSA-6803157	Antimicrobial peptides	2	123	0.00861888	0.852881	0.852881	2	58	0.00427193	9606	Homo sapiens	S100a9;S100a8		R-HSA-6798528;R-HSA-6798474
R-HSA-6784531	tRNA processing in the nucleus	1	70	0.00490505	0.855204	0.855204	1	7	0.000515578	9606	Homo sapiens	Nup160		R-HSA-6783483
R-HSA-1236974	ER-Phagosome pathway	3	173	0.0121225	0.855652	0.855652	5	10	0.00073654	9606	Homo sapiens	Tap2;S100a9;S100a8		R-HSA-8863895;R-HSA-8951595;R-HSA-8863858;R-HSA-1236949;R-HSA-8863914
R-HSA-5658442	Regulation of RAS by GAPs	1	71	0.00497512	0.859156	0.859156	2	5	0.00036827	9606	Homo sapiens	Rasa2		R-HSA-5658231;R-HSA-5658435
R-HSA-6790901	rRNA modification in the nucleus and cytosol	1	71	0.00497512	0.859156	0.859156	1	8	0.000589232	9606	Homo sapiens	Dimt1		R-HSA-6790994
R-HSA-936837	Ion transport by P-type ATPases	1	71	0.00497512	0.859156	0.859156	1	16	0.00117846	9606	Homo sapiens	Camk2a		R-HSA-427910
R-HSA-2559586	DNA Damage/Telomere Stress Induced Senescence	1	71	0.00497512	0.859156	0.859156	1	18	0.00132577	9606	Homo sapiens	Pot1a		R-HSA-3785711
R-HSA-168325	Viral Messenger RNA Synthesis	1	72	0.0050452	0.863001	0.863001	2	6	0.000441924	9606	Homo sapiens	Nup160		R-HSA-192627;R-HSA-192925
R-HSA-3371497	HSP90 chaperone cycle for steroid hormone receptors (SHR) in the presence of ligand	1	72	0.0050452	0.863001	0.863001	1	16	0.00117846	9606	Homo sapiens	Tuba1b		R-HSA-5618080
R-HSA-196071	Metabolism of steroid hormones	1	72	0.0050452	0.863001	0.863001	1	40	0.00294616	9606	Homo sapiens	Stard3nl		R-HSA-196126
R-HSA-68949	Orc1 removal from chromatin	1	73	0.00511527	0.866741	0.866741	1	4	0.000294616	9606	Homo sapiens	Orc6		R-HSA-68944
R-HSA-5362517	Signaling by Retinoic Acid	1	73	0.00511527	0.866741	0.866741	1	21	0.00154673	9606	Homo sapiens	Pdk2		R-HSA-203946
R-HSA-1793185	Chondroitin sulfate/dermatan sulfate metabolism	1	73	0.00511527	0.866741	0.866741	1	28	0.00206231	9606	Homo sapiens	Csgalnact2		R-HSA-1971482
R-HSA-8950505	Gene and protein expression by JAK-STAT signaling after Interleukin-12 stimulation	1	73	0.00511527	0.866741	0.866741	1	36	0.00265154	9606	Homo sapiens	Sod3		R-HSA-8950771
R-HSA-8948751	Regulation of PTEN stability and activity	1	74	0.00518534	0.870379	0.870379	1	13	0.000957502	9606	Homo sapiens	Akt3		R-HSA-8948757
R-HSA-191273	Cholesterol biosynthesis	1	74	0.00518534	0.870379	0.870379	2	34	0.00250424	9606	Homo sapiens	Ggps1		R-HSA-9717830;R-HSA-9717834
R-HSA-9013026	RHOB GTPase cycle	1	75	0.00525541	0.873918	0.873918	1	6	0.000441924	9606	Homo sapiens	Ptrf		R-HSA-9013024
R-HSA-446219	Synthesis of substrates in N-glycan biosythesis	2	131	0.00917945	0.876222	0.876222	1	49	0.00360904	9606	Homo sapiens	St8sia6;St8sia1		R-HSA-4084978
R-HSA-1630316	Glycosaminoglycan metabolism	3	182	0.0127531	0.877964	0.877964	4	88	0.00648155	9606	Homo sapiens	Sat1;Papss1;Csgalnact2		R-HSA-1971482;R-HSA-427555;R-HSA-174389;R-HSA-174392
R-HSA-204005	COPII-mediated vesicle transport	1	77	0.00539556	0.88071	0.88071	10	16	0.00117846	9606	Homo sapiens	Ctsz		R-HSA-5694439;R-HSA-5694418;R-HSA-203973;R-HSA-5694417;R-HSA-5694446;R-HSA-5694527;R-HSA-204008;R-HSA-5694522;R-HSA-5694441;R-HSA-5694409
R-HSA-5218859	Regulated Necrosis	1	77	0.00539556	0.88071	0.88071	3	57	0.00419828	9606	Homo sapiens	Tnfsf10		R-HSA-3465429;R-HSA-5675456;R-HSA-5213462
R-HSA-5173105	O-linked glycosylation	2	133	0.0093196	0.8815	0.8815	3	28	0.00206231	9606	Homo sapiens	Adamts15;Pomgnt2		R-HSA-5173005;R-HSA-5173192;R-HSA-8879117
R-HSA-422475	Axon guidance	12	585	0.0409922	0.883446	0.883446	14	298	0.0219489	9606	Homo sapiens	Cxcl12;Dpysl3;Plxnd1;Dok2;Shank3;Tuba1b;Col6a1;Col6a2;Mmp2;Myo10;Irs2;Pik3cd		R-HSA-593672;R-HSA-8855617;R-HSA-445071;R-HSA-399951;R-HSA-375151;R-HSA-3928657;R-HSA-8855915;R-HSA-416683;R-HSA-399947;R-HSA-399944;R-HSA-445077;R-HSA-416690;R-HSA-8986258;R-HSA-8854905
R-HSA-9013408	RHOG GTPase cycle	1	78	0.00546563	0.883967	0.883967	1	6	0.000441924	9606	Homo sapiens	Arfgap3		R-HSA-9014449
R-HSA-3906995	Diseases associated with O-glycosylation of proteins	1	78	0.00546563	0.883967	0.883967	1	9	0.000662886	9606	Homo sapiens	Adamts15		R-HSA-6785565
R-HSA-1834949	Cytosolic sensors of pathogen-associated DNA	1	78	0.00546563	0.883967	0.883967	3	50	0.0036827	9606	Homo sapiens	Lrrfip1		R-HSA-3134904;R-HSA-3134901;R-HSA-3134896
R-HSA-195258	RHO GTPase Effectors	6	326	0.0228435	0.885739	0.885739	15	113	0.0083229	9606	Homo sapiens	Cenpq;Ncf1;Tuba1b;Nup160;S100a9;S100a8		R-HSA-9626832;R-HSA-5668629;R-HSA-5218827;R-HSA-5666160;R-HSA-5666129;R-HSA-5668735;R-HSA-5668605;R-HSA-5668731;R-HSA-5666169;R-HSA-9626848;R-HSA-9626880;R-HSA-9626816;R-HSA-9626817;R-HSA-5218841;R-HSA-5672329
R-HSA-3371556	Cellular response to heat stress	2	135	0.00945974	0.886569	0.886569	2	29	0.00213597	9606	Homo sapiens	Camk2a;Nup160		R-HSA-5252041;R-HSA-5082387
R-HSA-9013106	RHOC GTPase cycle	1	79	0.0055357	0.887136	0.887136	1	6	0.000441924	9606	Homo sapiens	Ptrf		R-HSA-9013110
R-HSA-5250913	Positive epigenetic regulation of rRNA expression	1	80	0.00560577	0.890219	0.890219	2	7	0.000515578	9606	Homo sapiens	Chd3		R-HSA-427404;R-HSA-427336
R-HSA-351202	Metabolism of polyamines	1	80	0.00560577	0.890219	0.890219	2	17	0.00125212	9606	Homo sapiens	Sat1		R-HSA-351207;R-HSA-351208
R-HSA-499943	Interconversion of nucleotide di- and triphosphates	1	80	0.00560577	0.890219	0.890219	2	33	0.00243058	9606	Homo sapiens	Ak5		R-HSA-110137;R-HSA-110138
R-HSA-198725	Nuclear Events (kinase and transcription factor activation)	1	80	0.00560577	0.890219	0.890219	2	48	0.00353539	9606	Homo sapiens	Rest		R-HSA-9620723;R-HSA-9621054
R-HSA-159236	Transport of Mature mRNA derived from an Intron-Containing Transcript	1	81	0.00567585	0.893218	0.893218	3	4	0.000294616	9606	Homo sapiens	Nup160		R-HSA-75097;R-HSA-75096;R-HSA-75098
R-HSA-167172	Transcription of the HIV genome	1	81	0.00567585	0.893218	0.893218	20	47	0.00346174	9606	Homo sapiens	Ccnt1		R-HSA-167234;R-HSA-167459;R-HSA-167076;R-HSA-167077;R-HSA-167150;R-HSA-167148;R-HSA-167084;R-HSA-167181;R-HSA-170706;R-HSA-167090;R-HSA-167282;R-HSA-170704;R-HSA-167191;R-HSA-167284;R-HSA-167192;R-HSA-167288;R-HSA-167481;R-HSA-167196;R-HSA-167292;R-HSA-167197
R-HSA-5578749	Transcriptional regulation by small RNAs	1	81	0.00567585	0.893218	0.893218	1	5	0.00036827	9606	Homo sapiens	Nup160		R-HSA-5578744
R-HSA-204998	Cell death signalling via NRAGE, NRIF and NADE	1	81	0.00567585	0.893218	0.893218	3	17	0.00125212	9606	Homo sapiens	Maged1		R-HSA-205115;R-HSA-204958;R-HSA-205132
R-HSA-3108214	SUMOylation of DNA damage response and repair proteins	1	81	0.00567585	0.893218	0.893218	4	24	0.0017677	9606	Homo sapiens	Nup160		R-HSA-3000348;R-HSA-3000399;R-HSA-5228508;R-HSA-3000411
R-HSA-1445148	Translocation of SLC2A4 (GLUT4) to the plasma membrane	1	81	0.00567585	0.893218	0.893218	1	15	0.00110481	9606	Homo sapiens	Tuba1b		R-HSA-2316347
R-HSA-73886	Chromosome Maintenance	2	138	0.00966996	0.893798	0.893798	32	38	0.00279885	9606	Homo sapiens	Cenpq;Pot1a		R-HSA-606349;R-HSA-9670101;R-HSA-606287;R-HSA-181450;R-HSA-164617;R-HSA-164620;R-HSA-163090;R-HSA-9670149;R-HSA-606289;R-HSA-163099;R-HSA-174427;R-HSA-163096;R-HSA-174425;R-HSA-174438;R-HSA-174439;R-HSA-9668597;R-HSA-9686521;R-HSA-174441;R-HSA-174446;R-HSA-174447;R-HSA-174444;R-HSA-174445;R-HSA-9686524;R-HSA-174451;R-HSA-9670114;R-HSA-174448;R-HSA-163120;R-HSA-174452;R-HSA-174456;R-HSA-176702;R-H…
R-HSA-212165	Epigenetic regulation of gene expression	2	139	0.00974003	0.896111	0.896111	4	34	0.00250424	9606	Homo sapiens	Chd3;Jarid2		R-HSA-212263;R-HSA-427404;R-HSA-427336;R-HSA-212252
R-HSA-1226099	Signaling by FGFR in disease	1	82	0.00574592	0.896134	0.896134	9	106	0.00780732	9606	Homo sapiens	Lrrfip1		R-HSA-1839100;R-HSA-1839039;R-HSA-1839080;R-HSA-1839065;R-HSA-1839098;R-HSA-1839094;R-HSA-1839078;R-HSA-1839031;R-HSA-1839091
R-HSA-1222556	ROS and RNS production in phagocytes	1	82	0.00574592	0.896134	0.896134	1	45	0.00331443	9606	Homo sapiens	Ncf1		R-HSA-6789092
R-HSA-70326	Glucose metabolism	2	140	0.0098101	0.898377	0.898377	2	50	0.0036827	9606	Homo sapiens	44443;Nup160		R-HSA-71802;R-HSA-170796
R-HSA-8852276	The role of GTSE1 in G2/M progression after G2 checkpoint	1	83	0.00581599	0.898972	0.898972	3	10	0.00073654	9606	Homo sapiens	Tuba1b		R-HSA-8852306;R-HSA-8852298;R-HSA-8852280
R-HSA-1169408	ISG15 antiviral mechanism	1	83	0.00581599	0.898972	0.898972	1	16	0.00117846	9606	Homo sapiens	Nup160		R-HSA-1176059
R-HSA-2990846	SUMOylation	3	192	0.0134539	0.899123	0.899123	16	140	0.0103116	9606	Homo sapiens	Senp5;Chd3;Nup160		R-HSA-5228525;R-HSA-3000399;R-HSA-5228523;R-HSA-4551649;R-HSA-8956365;R-HSA-4615872;R-HSA-2993763;R-HSA-3000348;R-HSA-5228508;R-HSA-4615987;R-HSA-2990840;R-HSA-3000411;R-HSA-2990842;R-HSA-4570493;R-HSA-4551679;R-HSA-4655355
R-HSA-109581	Apoptosis	3	192	0.0134539	0.899123	0.899123	6	141	0.0103852	9606	Homo sapiens	Maged1;Akt3;Tnfsf10		R-HSA-139952;R-HSA-141156;R-HSA-198347;R-HSA-3465448;R-HSA-3371359;R-HSA-374699
R-HSA-5683057	MAPK family signaling cascades	7	380	0.0266274	0.899649	0.899649	9	122	0.00898578	9606	Homo sapiens	Dusp2;Rasa2;Camk2a;Mmp2;Flt3l;Irs2;Cdc14b		R-HSA-5658231;R-HSA-5672965;R-HSA-5692754;R-HSA-5658435;R-HSA-5692764;R-HSA-5675373;R-HSA-5692749;R-HSA-5687099;R-HSA-5672969
R-HSA-196807	Nicotinate metabolism	1	84	0.00588606	0.901732	0.901732	2	29	0.00213597	9606	Homo sapiens	Nmnat2		R-HSA-197235;R-HSA-8939959
R-HSA-9020591	Interleukin-12 signaling	1	84	0.00588606	0.901732	0.901732	1	56	0.00412462	9606	Homo sapiens	Sod3		R-HSA-8950771
R-HSA-2467813	Separation of Sister Chromatids	3	195	0.0136641	0.904795	0.904795	2	8	0.000589232	9606	Homo sapiens	Cenpq;Tuba1b;Nup160		R-HSA-2467809;R-HSA-2467811
R-HSA-187037	Signaling by NTRK1 (TRKA)	2	143	0.0100203	0.904902	0.904902	6	102	0.00751271	9606	Homo sapiens	Rest;Irs2		R-HSA-198211;R-HSA-9620723;R-HSA-198295;R-HSA-198315;R-HSA-198266;R-HSA-9621054
R-HSA-383280	Nuclear Receptor transcription pathway	1	86	0.00602621	0.907029	0.907029	2	2	0.000147308	9606	Homo sapiens	Esr2		R-HSA-382096;R-HSA-376419
R-HSA-1660662	Glycosphingolipid metabolism	1	86	0.00602621	0.907029	0.907029	1	32	0.00235693	9606	Homo sapiens	Gba2		R-HSA-1861788
R-HSA-73854	RNA Polymerase I Promoter Clearance	1	87	0.00609628	0.909569	0.909569	1	10	0.00073654	9606	Homo sapiens	Chd3		R-HSA-73739
R-HSA-5579029	Metabolic disorders of biological oxidation enzymes	1	87	0.00609628	0.909569	0.909569	1	38	0.00279885	9606	Homo sapiens	Cyp2u1		R-HSA-5602242
R-HSA-674695	RNA Polymerase II Pre-transcription Events	1	88	0.00616635	0.91204	0.91204	7	17	0.00125212	9606	Homo sapiens	Ccnt1		R-HSA-113411;R-HSA-113429;R-HSA-113413;R-HSA-113414;R-HSA-112392;R-HSA-112395;R-HSA-112430
R-HSA-9664433	Leishmania parasite growth and survival	5	297	0.0208114	0.912443	0.912443	5	40	0.00294616	9606	Homo sapiens	Mc5r;Gnai2;Dpep2;Gng8;Dact3		R-HSA-9660819;R-HSA-392129;R-HSA-266012;R-HSA-9660824;R-HSA-9660828
R-HSA-9662851	Anti-inflammatory response favouring Leishmania parasite infection	5	297	0.0208114	0.912443	0.912443	5	40	0.00294616	9606	Homo sapiens	Mc5r;Gnai2;Dpep2;Gng8;Dact3		R-HSA-9660819;R-HSA-392129;R-HSA-266012;R-HSA-9660824;R-HSA-9660828
R-HSA-6796648	TP53 Regulates Transcription of DNA Repair Genes	1	89	0.00623642	0.914444	0.914444	3	17	0.00125212	9606	Homo sapiens	Ccnt1		R-HSA-6797606;R-HSA-6797616;R-HSA-6797712
R-HSA-1912408	Pre-NOTCH Transcription and Translation	1	89	0.00623642	0.914444	0.914444	2	28	0.00206231	9606	Homo sapiens	Ccnd1		R-HSA-4395227;R-HSA-1912416
R-HSA-72202	Transport of Mature Transcript to Cytoplasm	1	90	0.0063065	0.916783	0.916783	12	13	0.000957502	9606	Homo sapiens	Nup160		R-HSA-77587;R-HSA-158481;R-HSA-159046;R-HSA-158484;R-HSA-159050;R-HSA-75097;R-HSA-75096;R-HSA-158441;R-HSA-75098;R-HSA-77594;R-HSA-158447;R-HSA-111439
R-HSA-1483249	Inositol phosphate metabolism	1	90	0.0063065	0.916783	0.916783	5	71	0.00522943	9606	Homo sapiens	Ip6k2		R-HSA-1855181;R-HSA-1855230;R-HSA-1855224;R-HSA-1855157;R-HSA-1855207
R-HSA-375276	Peptide ligand-binding receptors	3	203	0.0142247	0.918539	0.918539	5	77	0.00567136	9606	Homo sapiens	Cxcl12;Mc5r;Ccl19		R-HSA-388596;R-HSA-374214;R-HSA-373071;R-HSA-443978;R-HSA-3296301
R-HSA-1632852	Macroautophagy	2	150	0.0105108	0.918638	0.918638	13	87	0.0064079	9606	Homo sapiens	Tuba1b;Arl13b		R-HSA-9640114;R-HSA-9639698;R-HSA-9646354;R-HSA-9646679;R-HSA-9641111;R-HSA-9646390;R-HSA-9641109;R-HSA-9646685;R-HSA-9641127;R-HSA-9646347;R-HSA-9641096;R-HSA-9646383;R-HSA-9646348
R-HSA-195253	Degradation of beta-catenin by the destruction complex	1	91	0.00637657	0.919057	0.919057	3	23	0.00169404	9606	Homo sapiens	Peg12		R-HSA-195283;R-HSA-195287;R-HSA-195300
R-HSA-162909	Host Interactions of HIV factors	2	151	0.0105809	0.920441	0.920441	7	54	0.00397731	9606	Homo sapiens	Ccnt1;Nup160		R-HSA-167234;R-HSA-165043;R-HSA-167235;R-HSA-180710;R-HSA-165047;R-HSA-180622;R-HSA-180732
R-HSA-1500620	Meiosis	1	92	0.00644664	0.92127	0.92127	1	15	0.00110481	9606	Homo sapiens	Pot1a		R-HSA-912408
R-HSA-5696399	Global Genome Nucleotide Excision Repair (GG-NER)	1	92	0.00644664	0.92127	0.92127	1	20	0.00147308	9606	Homo sapiens	Ino80d		R-HSA-5691006
R-HSA-983712	Ion channel transport	3	206	0.0144349	0.923209	0.923209	3	45	0.00331443	9606	Homo sapiens	Camk2a;Ano8;Sgk3		R-HSA-427910;R-HSA-2682349;R-HSA-2684901
R-HSA-112316	Neuronal System	9	489	0.0342653	0.923309	0.923309	36	216	0.0159093	9606	Homo sapiens	Ache;Shank3;Tuba1b;Camk2a;Gnai2;Gng8;Sat1;Dact3;Podn		R-HSA-9634834;R-HSA-9619542;R-HSA-212614;R-HSA-416320;R-HSA-6794351;R-HSA-392206;R-HSA-442760;R-HSA-6794344;R-HSA-9610627;R-HSA-6794357;R-HSA-1013020;R-HSA-438037;R-HSA-6797554;R-HSA-1013013;R-HSA-1013012;R-HSA-372519;R-HSA-432164;R-HSA-442725;R-HSA-432162;R-HSA-9612085;R-HSA-170666;R-HSA-500717;R-HSA-442732;R-HSA-432172;R-HSA-9619449;R-HSA-9618750;R-HSA-170671;R-HSA-170674;R-HSA-6797974;R-HSA-44…
R-HSA-69052	Switching of origins to a post-replicative state	1	93	0.00651671	0.923422	0.923422	1	9	0.000662886	9606	Homo sapiens	Orc6		R-HSA-68944
R-HSA-1614635	Sulfur amino acid metabolism	1	93	0.00651671	0.923422	0.923422	1	37	0.0027252	9606	Homo sapiens	Csad		R-HSA-1655443
R-HSA-9675108	Nervous system development	12	621	0.0435148	0.923451	0.923451	14	324	0.0238639	9606	Homo sapiens	Cxcl12;Dpysl3;Plxnd1;Dok2;Shank3;Tuba1b;Col6a1;Col6a2;Mmp2;Myo10;Irs2;Pik3cd		R-HSA-593672;R-HSA-8855617;R-HSA-445071;R-HSA-399951;R-HSA-375151;R-HSA-3928657;R-HSA-8855915;R-HSA-416683;R-HSA-399947;R-HSA-399944;R-HSA-445077;R-HSA-416690;R-HSA-8986258;R-HSA-8854905
R-HSA-202733	Cell surface interactions at the vascular wall	4	257	0.0180085	0.924013	0.924013	4	65	0.00478751	9606	Homo sapiens	Cd74;Dok2;Slc16a3;Gas6		R-HSA-204850;R-HSA-5676133;R-HSA-202710;R-HSA-204392
R-HSA-194315	Signaling by Rho GTPases	14	709	0.0496812	0.925079	0.925079	37	203	0.0149518	9606	Homo sapiens	Syde1;Ncf1;Tuba1b;Arl13b;Add3;Plxnd1;Fam13b;Cenpq;Arfgap3;Ckb;Nup160;S100a9;Ptrf;S100a8		R-HSA-9626832;R-HSA-5668629;R-HSA-5218827;R-HSA-5666129;R-HSA-9018758;R-HSA-9013145;R-HSA-9013144;R-HSA-9014424;R-HSA-9626880;R-HSA-9626816;R-HSA-9626817;R-HSA-5218841;R-HSA-9693125;R-HSA-9013009;R-HSA-9696266;R-HSA-9017488;R-HSA-9693198;R-HSA-9014295;R-HSA-5672329;R-HSA-9696268;R-HSA-9013161;R-HSA-5666160;R-HSA-5668735;R-HSA-9013024;R-HSA-9017507;R-HSA-5668605;R-HSA-9013157;R-HSA-5668731;R-HSA-5…
R-HSA-6807505	RNA polymerase II transcribes snRNA genes	1	94	0.00658678	0.925516	0.925516	9	11	0.000810194	9606	Homo sapiens	Ccnt1		R-HSA-6814885;R-HSA-6814549;R-HSA-6814559;R-HSA-6810238;R-HSA-6814555;R-HSA-6810235;R-HSA-6814554;R-HSA-6810234;R-HSA-6810233
R-HSA-1169410	Antiviral mechanism by IFN-stimulated genes	1	94	0.00658678	0.925516	0.925516	1	31	0.00228327	9606	Homo sapiens	Nup160		R-HSA-1176059
R-HSA-166658	Complement cascade	2	156	0.0109313	0.928907	0.928907	9	71	0.00522943	9606	Homo sapiens	Cpn1;Efcab7		R-HSA-166721;R-HSA-166753;R-HSA-166726;R-HSA-2855054;R-HSA-8852509;R-HSA-166792;R-HSA-8852809;R-HSA-2855077;R-HSA-2855125
R-HSA-68877	Mitotic Prometaphase	3	211	0.0147852	0.930453	0.930453	8	20	0.00147308	9606	Homo sapiens	Cenpq;Tuba1b;Nup160		R-HSA-9648114;R-HSA-9648017;R-HSA-2484822;R-HSA-375302;R-HSA-380316;R-HSA-1638803;R-HSA-2468287;R-HSA-1638821
R-HSA-380320	Recruitment of NuMA to mitotic centrosomes	1	97	0.006797	0.93146	0.93146	1	2	0.000147308	9606	Homo sapiens	Tuba1b		R-HSA-380316
R-HSA-9711123	Cellular response to chemical stress	3	212	0.0148553	0.931824	0.931824	9	71	0.00522943	9606	Homo sapiens	Ncf1;Sod3		R-HSA-3299682;R-HSA-8951723;R-HSA-3697838;R-HSA-3780958;R-HSA-3780979;R-HSA-1222376;R-HSA-3299753;R-HSA-3697860;R-HSA-4837364
R-HSA-5689603	UCH proteinases	1	98	0.00686707	0.933335	0.933335	1	11	0.000810194	9606	Homo sapiens	Ino80d		R-HSA-5689544
R-HSA-73887	Death Receptor Signalling	2	159	0.0111415	0.933571	0.933571	8	93	0.00684982	9606	Homo sapiens	Maged1;Tnfsf10		R-HSA-141139;R-HSA-75187;R-HSA-141316;R-HSA-75238;R-HSA-205115;R-HSA-75146;R-HSA-204958;R-HSA-205132
R-HSA-446193	Biosynthesis of the N-glycan precursor (dolichol lipid-linked oligosaccharide, LLO) and transfer to a nascent protein	2	159	0.0111415	0.933571	0.933571	1	63	0.0046402	9606	Homo sapiens	St8sia6;St8sia1		R-HSA-4084978
R-HSA-4086400	PCP/CE pathway	1	99	0.00693715	0.935158	0.935158	4	24	0.0017677	9606	Homo sapiens	Fzd2		R-HSA-5099886;R-HSA-5140747;R-HSA-5140741;R-HSA-4608825
R-HSA-71387	Metabolism of carbohydrates	8	456	0.0319529	0.935236	0.935236	12	243	0.0178979	9606	Homo sapiens	Man2b2;44443;Sat1;Nup160;Papss1;Fut4;Csgalnact2		R-HSA-9605682;R-HSA-9603986;R-HSA-9603984;R-HSA-1971482;R-HSA-427555;R-HSA-174389;R-HSA-6799581;R-HSA-174392;R-HSA-71802;R-HSA-9605609;R-HSA-170796;R-HSA-9605644
R-HSA-73884	Base Excision Repair	1	100	0.00700722	0.936931	0.936931	6	107	0.00788098	9606	Homo sapiens	Pot1a		R-HSA-9629216;R-HSA-9629483;R-HSA-9629195;R-HSA-9629497;R-HSA-9629372;R-HSA-9629373
R-HSA-8986944	Transcriptional Regulation by MECP2	1	100	0.00700722	0.936931	0.936931	1	77	0.00567136	9606	Homo sapiens	Camk2a		R-HSA-9006992
R-HSA-9716542	Signaling by Rho GTPases, Miro GTPases and RHOBTB3	14	725	0.0508023	0.937805	0.937805	37	212	0.0156146	9606	Homo sapiens	Syde1;Ncf1;Tuba1b;Arl13b;Add3;Plxnd1;Fam13b;Cenpq;Arfgap3;Ckb;Nup160;S100a9;Ptrf;S100a8		R-HSA-9626832;R-HSA-5668629;R-HSA-5218827;R-HSA-5666129;R-HSA-9018758;R-HSA-9013145;R-HSA-9013144;R-HSA-9014424;R-HSA-9626880;R-HSA-9626816;R-HSA-9626817;R-HSA-5218841;R-HSA-9693125;R-HSA-9013009;R-HSA-9696266;R-HSA-9017488;R-HSA-9693198;R-HSA-9014295;R-HSA-5672329;R-HSA-9696268;R-HSA-9013161;R-HSA-5666160;R-HSA-5668735;R-HSA-9013024;R-HSA-9017507;R-HSA-5668605;R-HSA-9013157;R-HSA-5668731;R-HSA-5…
R-HSA-9679506	SARS-CoV Infections	3	217	0.0152057	0.938315	0.938315	2	256	0.0188554	9606	Homo sapiens	Rest;Chd3;Crbn		R-HSA-9681169;R-HSA-9679787
R-HSA-68867	Assembly of the pre-replicative complex	1	102	0.00714736	0.940334	0.940334	8	18	0.00132577	9606	Homo sapiens	Orc6		R-HSA-68849;R-HSA-68688;R-HSA-68615;R-HSA-9734670;R-HSA-9734687;R-HSA-68826;R-HSA-9734713;R-HSA-176973
R-HSA-2682334	EPH-Ephrin signaling	1	102	0.00714736	0.940334	0.940334	1	56	0.00412462	9606	Homo sapiens	Mmp2		R-HSA-3928657
R-HSA-162599	Late Phase of HIV Life Cycle	2	164	0.0114918	0.940707	0.940707	22	78	0.00574501	9606	Homo sapiens	Ccnt1;Nup160		R-HSA-167234;R-HSA-167459;R-HSA-167076;R-HSA-167077;R-HSA-167150;R-HSA-167148;R-HSA-167084;R-HSA-167181;R-HSA-170706;R-HSA-167090;R-HSA-167282;R-HSA-165043;R-HSA-170704;R-HSA-165047;R-HSA-167191;R-HSA-167284;R-HSA-167192;R-HSA-167288;R-HSA-167481;R-HSA-167196;R-HSA-167292;R-HSA-167197
R-HSA-983170	Antigen Presentation: Folding, assembly and peptide loading of class I MHC	1	103	0.00721743	0.941967	0.941967	4	16	0.00117846	9606	Homo sapiens	Tap2		R-HSA-8951499;R-HSA-983161;R-HSA-983144;R-HSA-983142
R-HSA-983695	Antigen activates B Cell Receptor (BCR) leading to generation of second messengers	1	103	0.00721743	0.941967	0.941967	4	25	0.00184135	9606	Homo sapiens	Pik3cd		R-HSA-9606160;R-HSA-2076220;R-HSA-9606887;R-HSA-2045911
R-HSA-425393	Transport of inorganic cations/anions and amino acids/oligopeptides	2	165	0.0115619	0.942044	0.942044	2	75	0.00552405	9606	Homo sapiens	Sat1		R-HSA-352119;R-HSA-427555
R-HSA-5673001	RAF/MAP kinase cascade	5	322	0.0225632	0.942387	0.942387	5	75	0.00552405	9606	Homo sapiens	Dusp2;Rasa2;Camk2a;Flt3l;Irs2		R-HSA-5658231;R-HSA-5672965;R-HSA-5658435;R-HSA-5675373;R-HSA-5672969
R-HSA-9612973	Autophagy	2	166	0.011632	0.943353	0.943353	24	108	0.00795463	9606	Homo sapiens	Tuba1b;Arl13b		R-HSA-9639698;R-HSA-9646354;R-HSA-9640114;R-HSA-9646679;R-HSA-9641111;R-HSA-9646390;R-HSA-9641109;R-HSA-9622840;R-HSA-9631065;R-HSA-9624158;R-HSA-9646685;R-HSA-9631068;R-HSA-9641127;R-HSA-9625188;R-HSA-9620197;R-HSA-9646347;R-HSA-9641096;R-HSA-9615721;R-HSA-9646383;R-HSA-9622831;R-HSA-9626060;R-HSA-9625196;R-HSA-9646348;R-HSA-9625197
R-HSA-166520	Signaling by NTRKs	2	166	0.011632	0.943353	0.943353	6	164	0.0120793	9606	Homo sapiens	Rest;Irs2		R-HSA-198211;R-HSA-9620723;R-HSA-198295;R-HSA-198315;R-HSA-198266;R-HSA-9621054
R-HSA-5668541	TNFR2 non-canonical NF-kB pathway	1	104	0.00728751	0.943554	0.943554	19	43	0.00316712	9606	Homo sapiens	Map3k14		R-HSA-5676598;R-HSA-5668534;R-HSA-5676596;R-HSA-5676597;R-HSA-5676595;R-HSA-5676593;R-HSA-5668414;R-HSA-5668543;R-HSA-5668454;R-HSA-5668545;R-HSA-5668481;R-HSA-5668417;R-HSA-5607725;R-HSA-5607726;R-HSA-5607721;R-HSA-5607720;R-HSA-5607723;R-HSA-5668520;R-HSA-5607722
R-HSA-446652	Interleukin-1 family signaling	2	167	0.0117021	0.944633	0.944633	9	80	0.00589232	9606	Homo sapiens	Bcam;Map3k8		R-HSA-5684261;R-HSA-451634;R-HSA-168166;R-HSA-5684275;R-HSA-451649;R-HSA-5684273;R-HSA-5684250;R-HSA-5684267;R-HSA-5684248
R-HSA-77289	Mitochondrial Fatty Acid Beta-Oxidation	1	105	0.00735758	0.945099	0.945099	1	47	0.00346174	9606	Homo sapiens	Acbd6		R-HSA-8848250
R-HSA-2173782	Binding and Uptake of Ligands by Scavenger Receptors	2	168	0.0117721	0.945886	0.945886	2	33	0.00243058	9606	Homo sapiens	Ssc5d;Efcab7		R-HSA-2203480;R-HSA-8878603
R-HSA-5684996	MAPK1/MAPK3 signaling	5	329	0.0230537	0.948933	0.948933	5	82	0.00603963	9606	Homo sapiens	Dusp2;Rasa2;Camk2a;Flt3l;Irs2		R-HSA-5658231;R-HSA-5672965;R-HSA-5658435;R-HSA-5675373;R-HSA-5672969
R-HSA-3214847	HATs acetylate histones	1	110	0.00770794	0.952211	0.952211	1	15	0.00110481	9606	Homo sapiens	Dmap1		R-HSA-3321975
R-HSA-193704	p75 NTR receptor-mediated signalling	1	110	0.00770794	0.952211	0.952211	3	50	0.0036827	9606	Homo sapiens	Maged1		R-HSA-205115;R-HSA-204958;R-HSA-205132
R-HSA-9614085	FOXO-mediated transcription	1	110	0.00770794	0.952211	0.952211	1	85	0.00626059	9606	Homo sapiens	Akt3		R-HSA-199299
R-HSA-157579	Telomere Maintenance	1	111	0.00777801	0.953519	0.953519	28	34	0.00250424	9606	Homo sapiens	Pot1a		R-HSA-9670101;R-HSA-181450;R-HSA-164617;R-HSA-164620;R-HSA-163090;R-HSA-9670149;R-HSA-163099;R-HSA-174427;R-HSA-163096;R-HSA-174425;R-HSA-174438;R-HSA-174439;R-HSA-9668597;R-HSA-9686521;R-HSA-174441;R-HSA-174446;R-HSA-174447;R-HSA-174444;R-HSA-174445;R-HSA-9686524;R-HSA-174451;R-HSA-9670114;R-HSA-174448;R-HSA-163120;R-HSA-174452;R-HSA-174456;R-HSA-176702;R-HSA-176700
R-HSA-166786	Creation of C4 and C2 activators	1	111	0.00777801	0.953519	0.953519	6	8	0.000589232	9606	Homo sapiens	Efcab7		R-HSA-166721;R-HSA-166726;R-HSA-2855054;R-HSA-8852509;R-HSA-2855077;R-HSA-2855125
R-HSA-9711097	Cellular response to starvation	2	176	0.0123327	0.954982	0.954982	2	28	0.00206231	9606	Homo sapiens	Atf3		R-HSA-9635892;R-HSA-1791173
R-HSA-3371453	Regulation of HSF1-mediated heat shock response	1	113	0.00791816	0.956029	0.956029	1	14	0.00103116	9606	Homo sapiens	Nup160		R-HSA-5252041
R-HSA-5633007	Regulation of TP53 Activity	2	178	0.0124728	0.957017	0.957017	5	98	0.00721809	9606	Homo sapiens	Chd3;Akt3		R-HSA-6805620;R-HSA-198599;R-HSA-6805650;R-HSA-6805785;R-HSA-6805640
R-HSA-1912422	Pre-NOTCH Expression and Processing	1	114	0.00798823	0.957233	0.957233	2	38	0.00279885	9606	Homo sapiens	Ccnd1		R-HSA-4395227;R-HSA-1912416
R-HSA-5688426	Deubiquitination	4	289	0.0202509	0.957891	0.957891	4	77	0.00567136	9606	Homo sapiens	Ino80d;Rnf135;Usp49;Yod1		R-HSA-936381;R-HSA-5696960;R-HSA-6781953;R-HSA-5689544
R-HSA-162587	HIV Life Cycle	2	179	0.0125429	0.958001	0.958001	22	117	0.00861751	9606	Homo sapiens	Ccnt1;Nup160		R-HSA-167234;R-HSA-167459;R-HSA-167076;R-HSA-167077;R-HSA-167150;R-HSA-167148;R-HSA-167084;R-HSA-167181;R-HSA-170706;R-HSA-167090;R-HSA-167282;R-HSA-165043;R-HSA-170704;R-HSA-165047;R-HSA-167191;R-HSA-167284;R-HSA-167192;R-HSA-167288;R-HSA-167481;R-HSA-167196;R-HSA-167292;R-HSA-167197
R-HSA-5357801	Programmed Cell Death	3	238	0.0166772	0.959811	0.959811	9	197	0.0145098	9606	Homo sapiens	Maged1;Akt3;Tnfsf10		R-HSA-3465429;R-HSA-139952;R-HSA-141156;R-HSA-5675456;R-HSA-198347;R-HSA-5213462;R-HSA-3465448;R-HSA-3371359;R-HSA-374699
R-HSA-3108232	SUMO E3 ligases SUMOylate target proteins	2	183	0.0128232	0.961727	0.961727	13	131	0.00964867	9606	Homo sapiens	Chd3;Nup160		R-HSA-5228525;R-HSA-3000399;R-HSA-5228523;R-HSA-4551649;R-HSA-8956365;R-HSA-4615872;R-HSA-3000348;R-HSA-5228508;R-HSA-4615987;R-HSA-3000411;R-HSA-4570493;R-HSA-4551679;R-HSA-4655355
R-HSA-5619102	SLC transporter disorders	2	183	0.0128232	0.961727	0.961727	2	65	0.00478751	9606	Homo sapiens	Slc22a4;Nup160		R-HSA-5661474;R-HSA-5625674
R-HSA-5696398	Nucleotide Excision Repair	1	119	0.00833859	0.962776	0.962776	1	37	0.0027252	9606	Homo sapiens	Ino80d		R-HSA-5691006
R-HSA-69002	DNA Replication Pre-Initiation	1	120	0.00840866	0.963796	0.963796	15	27	0.00198866	9606	Homo sapiens	Orc6		R-HSA-68960;R-HSA-68615;R-HSA-9734687;R-HSA-68940;R-HSA-9734713;R-HSA-176973;R-HSA-68849;R-HSA-68688;R-HSA-68914;R-HSA-68917;R-HSA-68916;R-HSA-68919;R-HSA-68918;R-HSA-9734670;R-HSA-68826
R-HSA-166663	Initial triggering of complement	1	120	0.00840866	0.963796	0.963796	8	21	0.00154673	9606	Homo sapiens	Efcab7		R-HSA-166721;R-HSA-166753;R-HSA-166726;R-HSA-2855054;R-HSA-8852509;R-HSA-166792;R-HSA-2855077;R-HSA-2855125
R-HSA-5607764	CLEC7A (Dectin-1) signaling	1	120	0.00840866	0.963796	0.963796	6	45	0.00331443	9606	Homo sapiens	Map3k14		R-HSA-5607725;R-HSA-5607726;R-HSA-5607721;R-HSA-5607720;R-HSA-5607723;R-HSA-5607722
R-HSA-211000	Gene Silencing by RNA	1	120	0.00840866	0.963796	0.963796	1	40	0.00294616	9606	Homo sapiens	Nup160		R-HSA-5578744
R-HSA-909733	Interferon alpha/beta signaling	2	186	0.0130334	0.964311	0.964311	2	22	0.00162039	9606	Homo sapiens	Ip6k2		R-HSA-1015702;R-HSA-1015699
R-HSA-382556	ABC-family proteins mediated transport	1	122	0.00854881	0.965752	0.965752	1	27	0.00198866	9606	Homo sapiens	Abcb8		R-HSA-382560
R-HSA-1474165	Reproduction	1	123	0.00861888	0.96669	0.96669	1	24	0.0017677	9606	Homo sapiens	Pot1a		R-HSA-912408
R-HSA-5610787	Hedgehog 'off' state	1	124	0.00868895	0.967603	0.967603	2	32	0.00235693	9606	Homo sapiens	Tuba1b		R-HSA-5610733;R-HSA-5610767
R-HSA-68882	Mitotic Anaphase	3	249	0.017448	0.968047	0.968047	9	32	0.00235693	9606	Homo sapiens	Cenpq;Tuba1b;Nup160		R-HSA-9668419;R-HSA-9615937;R-HSA-2467809;R-HSA-2467811;R-HSA-9634219;R-HSA-9618378;R-HSA-9634169;R-HSA-9615945;R-HSA-9615901
R-HSA-9658195	Leishmania infection	6	406	0.0284493	0.96811	0.96811	6	95	0.00699713	9606	Homo sapiens	Myo10;Mc5r;Gnai2;Dpep2;Gng8;Dact3		R-HSA-9660819;R-HSA-392129;R-HSA-1861595;R-HSA-266012;R-HSA-9660824;R-HSA-9660828
R-HSA-9013149	RAC1 GTPase cycle	2	191	0.0133838	0.96825	0.96825	2	6	0.000441924	9606	Homo sapiens	Fam13b;Ncf1		R-HSA-9013145;R-HSA-9013144
R-HSA-2555396	Mitotic Metaphase and Anaphase	3	250	0.017518	0.968711	0.968711	9	33	0.00243058	9606	Homo sapiens	Cenpq;Tuba1b;Nup160		R-HSA-9668419;R-HSA-9615937;R-HSA-2467809;R-HSA-2467811;R-HSA-9634219;R-HSA-9618378;R-HSA-9634169;R-HSA-9615945;R-HSA-9615901
R-HSA-5628897	TP53 Regulates Metabolic Genes	1	126	0.00882909	0.969354	0.969354	1	34	0.00250424	9606	Homo sapiens	Akt3		R-HSA-198609
R-HSA-373760	L1CAM interactions	1	130	0.00910938	0.972578	0.972578	2	54	0.00397731	9606	Homo sapiens	Tuba1b		R-HSA-445077;R-HSA-445071
R-HSA-69239	Synthesis of DNA	1	133	0.0093196	0.974771	0.974771	1	26	0.001915	9606	Homo sapiens	Orc6		R-HSA-68944
R-HSA-68875	Mitotic Prophase	1	135	0.00945974	0.976136	0.976136	2	34	0.00250424	9606	Homo sapiens	Nup160		R-HSA-2990880;R-HSA-2990882
R-HSA-9006934	Signaling by Receptor Tyrosine Kinases	10	618	0.0433046	0.97643	0.97643	33	746	0.0549459	9606	Homo sapiens	Cxcl12;Rest;Col6a1;Ncf1;Col6a2;Akt3;Flt3l;Irs2;Bcar1		R-HSA-198211;R-HSA-109699;R-HSA-5218828;R-HSA-5218827;R-HSA-5218822;R-HSA-74707;R-HSA-1358791;R-HSA-198295;R-HSA-74711;R-HSA-5218841;R-HSA-8954207;R-HSA-5218839;R-HSA-74712;R-HSA-2428926;R-HSA-2428922;R-HSA-8954199;R-HSA-9620723;R-HSA-382052;R-HSA-2317314;R-HSA-382054;R-HSA-198315;R-HSA-5218855;R-HSA-9621054;R-HSA-74737;R-HSA-74736;R-HSA-198640;R-HSA-5218811;R-HSA-109817;R-HSA-198266;R-HSA-74747;…
R-HSA-199991	Membrane Trafficking	11	667	0.0467381	0.977171	0.977171	54	219	0.0161302	9606	Homo sapiens	Tmf1;Tuba1b;Akt3;Ctsz;Arfgap3;Pla2g4a;Pik3c2a;Tbc1d16;Cog7;Sat1;Ap4m1		R-HSA-5229132;R-HSA-5694418;R-HSA-5694417;R-HSA-8847887;R-HSA-5694428;R-HSA-8847635;R-HSA-2316347;R-HSA-190877;R-HSA-5694409;R-HSA-6807877;R-HSA-6807875;R-HSA-8876193;R-HSA-8867754;R-HSA-5694439;R-HSA-432688;R-HSA-5694446;R-HSA-190520;R-HSA-6814682;R-HSA-8847544;R-HSA-5694441;R-HSA-6811431;R-HSA-8849350;R-HSA-421831;R-HSA-6811429;R-HSA-6811428;R-HSA-432706;R-HSA-6811426;R-HSA-432707;R-HSA-203973;…
R-HSA-5576891	Cardiac conduction	1	138	0.00966996	0.978046	0.978046	2	27	0.00198866	9606	Homo sapiens	Camk2a		R-HSA-427910;R-HSA-5576895
R-HSA-977606	Regulation of Complement cascade	1	139	0.00974003	0.978648	0.978648	1	42	0.00309347	9606	Homo sapiens	Cpn1		R-HSA-8852809
R-HSA-6798695	Neutrophil degranulation	7	480	0.0336346	0.978852	0.978852	8	10	0.00073654	9606	Homo sapiens	Cpn1;Dok2;Ctsz;Anpep;Cd248;S100a9;S100a8		R-HSA-6798743;R-HSA-6799350;R-HSA-6798739;R-HSA-6800434;R-HSA-6798749;R-HSA-6798748;R-HSA-6798747;R-HSA-6800426
R-HSA-69275	G2/M Transition	2	212	0.0148553	0.98068	0.98068	9	78	0.00574501	9606	Homo sapiens	Lin54;Tuba1b		R-HSA-4088298;R-HSA-8852306;R-HSA-4088299;R-HSA-4088309;R-HSA-4088306;R-HSA-8852298;R-HSA-4088307;R-HSA-8852280;R-HSA-4088305
R-HSA-8956319	Nucleotide catabolism	1	144	0.0100904	0.98142	0.98142	1	63	0.0046402	9606	Homo sapiens	Nt5c3		R-HSA-109449
R-HSA-453274	Mitotic G2-G2/M phases	2	214	0.0149954	0.981581	0.981581	9	80	0.00589232	9606	Homo sapiens	Lin54;Tuba1b		R-HSA-4088298;R-HSA-8852306;R-HSA-4088299;R-HSA-4088309;R-HSA-4088306;R-HSA-8852298;R-HSA-4088307;R-HSA-8852280;R-HSA-4088305
R-HSA-9609690	HCMV Early Events	2	215	0.0150655	0.982016	0.982016	3	12	0.000883848	9606	Homo sapiens	Tuba1b;Nup160		R-HSA-9614369;R-HSA-9614343;R-HSA-9614367
R-HSA-69620	Cell Cycle Checkpoints	3	280	0.0196202	0.98352	0.98352	6	56	0.00412462	9606	Homo sapiens	Cenpq;Orc6;Nup160		R-HSA-141409;R-HSA-141431;R-HSA-176298;R-HSA-176318;R-HSA-141422;R-HSA-141439
R-HSA-1852241	Organelle biogenesis and maintenance	4	338	0.0236844	0.983848	0.983848	16	86	0.00633424	9606	Homo sapiens	Tuba1b;Arl13b;Tctn1;Ttbk2		R-HSA-5624949;R-HSA-5626228;R-HSA-5625424;R-HSA-5626227;R-HSA-5625426;R-HSA-5638012;R-HSA-5626681;R-HSA-5624953;R-HSA-5618328;R-HSA-5624952;R-HSA-5617816;R-HSA-5618331;R-HSA-5638009;R-HSA-5625421;R-HSA-5625416;R-HSA-5626699
R-HSA-388396	GPCR downstream signalling	13	786	0.0550767	0.984286	0.984286	60	168	0.0123739	9606	Homo sapiens	Cxcl12;Mgl2;Gpr1;Pla2g4a;Ccl19;Gpsm3;Dact3;Camk2a;Akt3;Mc5r;Gnai2;Gng8;S1pr3;Mgll		R-HSA-749448;R-HSA-749454;R-HSA-749453;R-HSA-749452;R-HSA-750988;R-HSA-167429;R-HSA-111881;R-HSA-111883;R-HSA-8982019;R-HSA-167433;R-HSA-392206;R-HSA-749446;R-HSA-8982020;R-HSA-8964614;R-HSA-112271;R-HSA-392212;R-HSA-8964634;R-HSA-751001;R-HSA-420883;R-HSA-8964241;R-HSA-750993;R-HSA-8964242;R-HSA-111898;R-HSA-749456;R-HSA-751019;R-HSA-379044;R-HSA-8964271;R-HSA-170666;R-HSA-380073;R-HSA-379048;R-…
R-HSA-211859	Biological oxidations	8	549	0.0384696	0.984685	0.984685	8	188	0.0138469	9606	Homo sapiens	Tpst1;Acy3;Cyp2u1;Gstt2;Dpep2;Sat1;Papss1		R-HSA-176054;R-HSA-427555;R-HSA-174389;R-HSA-5433067;R-HSA-174392;R-HSA-211960;R-HSA-9638046;R-HSA-8954262
R-HSA-416476	G alpha (q) signalling events	3	284	0.0199005	0.984894	0.984894	5	35	0.00257789	9606	Homo sapiens	Mgl2;Gng8;Dact3;Mgll		R-HSA-749448;R-HSA-749452;R-HSA-750993;R-HSA-426043;R-HSA-379048
R-HSA-8980692	RHOA GTPase cycle	1	154	0.0107911	0.985933	0.985933	1	6	0.000441924	9606	Homo sapiens	Ptrf		R-HSA-9013009
R-HSA-69481	G2/M Checkpoints	1	154	0.0107911	0.985933	0.985933	2	24	0.0017677	9606	Homo sapiens	Orc6		R-HSA-176298;R-HSA-176318
R-HSA-9664417	Leishmania phagocytosis	1	157	0.0110013	0.987061	0.987061	1	27	0.00198866	9606	Homo sapiens	Myo10		R-HSA-1861595
R-HSA-9664407	Parasite infection	1	157	0.0110013	0.987061	0.987061	1	27	0.00198866	9606	Homo sapiens	Myo10		R-HSA-1861595
R-HSA-9664422	FCGR3A-mediated phagocytosis	1	157	0.0110013	0.987061	0.987061	1	27	0.00198866	9606	Homo sapiens	Myo10		R-HSA-1861595
R-HSA-2029482	Regulation of actin dynamics for phagocytic cup formation	1	158	0.0110714	0.987416	0.987416	1	24	0.0017677	9606	Homo sapiens	Myo10		R-HSA-1861595
R-HSA-8856828	Clathrin-mediated endocytosis	1	161	0.0112816	0.988425	0.988425	3	35	0.00257789	9606	Homo sapiens	Pik3c2a		R-HSA-8868071;R-HSA-8867754;R-HSA-8868072
R-HSA-373076	Class A/1 (Rhodopsin-like receptors)	5	412	0.0288697	0.988909	0.988909	7	160	0.0117846	9606	Homo sapiens	Cxcl12;Mc5r;Gpr1;S1pr3;Ccl19		R-HSA-388596;R-HSA-419428;R-HSA-374214;R-HSA-373071;R-HSA-391934;R-HSA-443978;R-HSA-3296301
R-HSA-1428517	The citric acid (TCA) cycle and respiratory electron transport	2	238	0.0166772	0.98967	0.98967	4	67	0.00493482	9606	Homo sapiens	Slc16a3;Pdk2		R-HSA-373875;R-HSA-203946;R-HSA-373867;R-HSA-9011543
R-HSA-425407	SLC-mediated transmembrane transport	5	416	0.02915	0.989736	0.989736	5	191	0.0140679	9606	Homo sapiens	Slc22a4;Slc16a3;Sat1		R-HSA-549241;R-HSA-352119;R-HSA-433698;R-HSA-427555;R-HSA-549297
R-HSA-372790	Signaling by GPCR	14	865	0.0606124	0.99012	0.99012	69	355	0.0261472	9606	Homo sapiens	Cxcl12;Fzd2;Mgl2;Gpr1;Pla2g4a;Ccl19;Gpsm3;Dact3;Camk2a;Akt3;Mc5r;Gnai2;Gng8;S1pr3;Mgll		R-HSA-749448;R-HSA-749454;R-HSA-749453;R-HSA-749452;R-HSA-750988;R-HSA-167429;R-HSA-111881;R-HSA-111883;R-HSA-8982019;R-HSA-167433;R-HSA-392206;R-HSA-749446;R-HSA-8982020;R-HSA-8964614;R-HSA-112271;R-HSA-392212;R-HSA-8964634;R-HSA-751001;R-HSA-420883;R-HSA-8964241;R-HSA-750993;R-HSA-8964242;R-HSA-111898;R-HSA-749456;R-HSA-3296301;R-HSA-751019;R-HSA-379044;R-HSA-8964271;R-HSA-170666;R-HSA-381612;R…
R-HSA-983169	Class I MHC mediated antigen processing & presentation	6	474	0.0332142	0.99052	0.99052	14	48	0.00353539	9606	Homo sapiens	Ncf1;Mib2;Tap2;S100a9;S100a8;Znrf1		R-HSA-8951595;R-HSA-8951499;R-HSA-983147;R-HSA-1236949;R-HSA-983144;R-HSA-983142;R-HSA-983140;R-HSA-8863914;R-HSA-8863895;R-HSA-8863858;R-HSA-1236967;R-HSA-983161;R-HSA-983157;R-HSA-983156
R-HSA-2187338	Visual phototransduction	1	169	0.0118422	0.990737	0.990737	1	92	0.00677617	9606	Homo sapiens	Awat2		R-HSA-2465919
R-HSA-5653656	Vesicle-mediated transport	13	827	0.0579497	0.991335	0.991335	56	252	0.0185608	9606	Homo sapiens	Tmf1;Tuba1b;Pla2g4a;Pik3c2a;Sat1;Ap4m1;Ssc5d;Akt3;Ctsz;Arfgap3;Tbc1d16;Cog7;Efcab7		R-HSA-5229132;R-HSA-5694418;R-HSA-5694417;R-HSA-8847887;R-HSA-5694428;R-HSA-8878603;R-HSA-8847635;R-HSA-2316347;R-HSA-190877;R-HSA-5694409;R-HSA-6807877;R-HSA-6807875;R-HSA-8876193;R-HSA-8867754;R-HSA-5694439;R-HSA-432688;R-HSA-5694446;R-HSA-190520;R-HSA-6814682;R-HSA-8847544;R-HSA-5694441;R-HSA-6811431;R-HSA-8849350;R-HSA-421831;R-HSA-6811429;R-HSA-6811428;R-HSA-432706;R-HSA-6811426;R-HSA-432707…
R-HSA-69306	DNA Replication	1	174	0.0121926	0.991942	0.991942	16	53	0.00390366	9606	Homo sapiens	Orc6		R-HSA-68960;R-HSA-68615;R-HSA-9734687;R-HSA-68940;R-HSA-9734713;R-HSA-176973;R-HSA-68849;R-HSA-68688;R-HSA-68944;R-HSA-68914;R-HSA-68917;R-HSA-68916;R-HSA-68919;R-HSA-68918;R-HSA-9734670;R-HSA-68826
R-HSA-9610379	HCMV Late Events	1	175	0.0122626	0.992164	0.992164	2	19	0.00139943	9606	Homo sapiens	Nup160		R-HSA-9636128;R-HSA-9629004
R-HSA-1989781	PPARA activates gene expression	1	175	0.0122626	0.992164	0.992164	2	41	0.00301981	9606	Homo sapiens	Med11		R-HSA-560473;R-HSA-560517
R-HSA-162582	Signal Transduction	64	2997	0.210006	0.992223	0.992223	292	2454	0.180747	9606	Homo sapiens	Ncf1;Tuba1b;Peg12;Arl13b;Iqce;Pla2g4a;Irs2;Akt3;Arfgap3;Cxxc4;Nup160;Cxxc5;Pdk2;Mgll;Sfrp2;Mgl2;Mmp2;Tnfsf10;Fam13b;Maged1;Chd3;Mc5r;Gnai2;Gas1;Fstl1;Efcab7;Syde1;Cxcl12;Rasa2;Ccl19;Pmepa1;Add3;Dact3;Bcar1;Dusp2;Rest;Camk2a;Hes1;Gng8;S1pr3;Ckb;S100a9;Pik3cd;Cdc14b;S100a8;Fzd2;Col6a1;Ccnd1;Col6a2;Sox17;Mib2;Gpr1;Flt3l;Gpsm3;Esr2;Plxnd1;Cenpq;Ccnt1;Ptrf		R-HSA-9021068;R-HSA-141316;R-HSA-167429;R-HSA-167433;R-HSA-392206;R-HSA-392212;R-HSA-9014424;R-HSA-420883;R-HSA-9021596;R-HSA-8964241;R-HSA-9017488;R-HSA-9021072;R-HSA-8964242;R-HSA-2197562;R-HSA-9021079;R-HSA-3296301;R-HSA-3772441;R-HSA-9021609;R-HSA-5658231;R-HSA-2317314;R-HSA-8964271;R-HSA-9021601;R-HSA-9021600;R-HSA-9017507;R-HSA-8943780;R-HSA-9021627;R-HSA-2317332;R-HSA-3965444;R-HSA-9014449…
R-HSA-8978868	Fatty acid metabolism	5	431	0.0302011	0.992348	0.992348	6	217	0.0159829	9606	Homo sapiens	Acbd6;Cyp2u1;Slc22a4;Dpep2;Pla2g4a		R-HSA-165026;R-HSA-2161940;R-HSA-2161814;R-HSA-266012;R-HSA-111883;R-HSA-8848250
R-HSA-168273	Influenza Viral RNA Transcription and Replication	1	176	0.0123327	0.992379	0.992379	2	14	0.00103116	9606	Homo sapiens	Nup160		R-HSA-192627;R-HSA-192925
R-HSA-400206	Regulation of lipid metabolism by PPARalpha	1	177	0.0124028	0.992589	0.992589	2	44	0.00324077	9606	Homo sapiens	Med11		R-HSA-560473;R-HSA-560517
R-HSA-2408522	Selenoamino acid metabolism	1	180	0.012613	0.993184	0.993184	2	33	0.00243058	9606	Homo sapiens	Papss1		R-HSA-2408540;R-HSA-2408525
R-HSA-196849	Metabolism of water-soluble vitamins and cofactors	2	256	0.0179385	0.993344	0.993344	4	144	0.0106062	9606	Homo sapiens	Btd;Nmnat2		R-HSA-197235;R-HSA-3076905;R-HSA-4167509;R-HSA-8939959
R-HSA-15869	Metabolism of nucleotides	2	256	0.0179385	0.993344	0.993344	3	141	0.0103852	9606	Homo sapiens	Ak5;Nt5c3		R-HSA-110137;R-HSA-109449;R-HSA-110138
R-HSA-72306	tRNA processing	1	182	0.0127531	0.993553	0.993553	1	54	0.00397731	9606	Homo sapiens	Nup160		R-HSA-6783483
R-HSA-500792	GPCR ligand binding	8	606	0.0424637	0.994221	0.994221	9	187	0.0137733	9606	Homo sapiens	Cxcl12;Fzd2;Mc5r;Gpr1;Gng8;S1pr3;Ccl19;Dact3		R-HSA-388596;R-HSA-419428;R-HSA-374214;R-HSA-381612;R-HSA-373071;R-HSA-391934;R-HSA-443978;R-HSA-201708;R-HSA-3296301
R-HSA-211897	Cytochrome P450 - arranged by substrate type	1	186	0.0130334	0.994234	0.994234	1	61	0.00449289	9606	Homo sapiens	Cyp2u1		R-HSA-211960
R-HSA-8957322	Metabolism of steroids	3	328	0.0229837	0.994316	0.994316	5	244	0.0179716	9606	Homo sapiens	Stard3nl;Ggps1		R-HSA-1655832;R-HSA-9717830;R-HSA-2426161;R-HSA-196126;R-HSA-9717834
R-HSA-162906	HIV Infection	2	264	0.0184991	0.994534	0.994534	26	160	0.0117846	9606	Homo sapiens	Ccnt1;Nup160		R-HSA-167234;R-HSA-167235;R-HSA-180622;R-HSA-167181;R-HSA-170706;R-HSA-170704;R-HSA-167191;R-HSA-167192;R-HSA-167196;R-HSA-167197;R-HSA-167459;R-HSA-180710;R-HSA-167076;R-HSA-167077;R-HSA-167150;R-HSA-167148;R-HSA-167084;R-HSA-167090;R-HSA-167282;R-HSA-165043;R-HSA-165047;R-HSA-167284;R-HSA-167288;R-HSA-167481;R-HSA-180732;R-HSA-167292
R-HSA-983705	Signaling by the B Cell Receptor (BCR)	1	189	0.0132436	0.994697	0.994697	4	44	0.00324077	9606	Homo sapiens	Pik3cd		R-HSA-9606160;R-HSA-2076220;R-HSA-9606887;R-HSA-2045911
R-HSA-1280218	Adaptive Immune System	16	1005	0.0704225	0.994954	0.994954	64	264	0.0194446	9606	Homo sapiens	Cd74;H2-Eb1;Ncf1;Tuba1b;Mib2;Tap2;Map3k8;H2-Aa;Znrf1;Akt3;Ifi30;S100a9;Pik3cd;S100a8;Map3k14;H2-Ab1		R-HSA-2130336;R-HSA-9606160;R-HSA-2130725;R-HSA-202245;R-HSA-202248;R-HSA-2130731;R-HSA-2130349;R-HSA-2130478;R-HSA-8863895;R-HSA-2130486;R-HSA-2130619;R-HSA-2213248;R-HSA-2317314;R-HSA-8951595;R-HSA-2076220;R-HSA-8863914;R-HSA-202291;R-HSA-202165;R-HSA-2317332;R-HSA-202168;R-HSA-390329;R-HSA-202174;R-HSA-202307;R-HSA-8951498;R-HSA-8951499;R-HSA-8951500;R-HSA-1236949;R-HSA-2045911;R-HSA-2213235;R…
R-HSA-2029480	Fcgamma receptor (FCGR) dependent phagocytosis	1	193	0.0135239	0.995257	0.995257	1	42	0.00309347	9606	Homo sapiens	Myo10		R-HSA-1861595
R-HSA-9609646	HCMV Infection	2	270	0.0189195	0.995286	0.995286	5	31	0.00228327	9606	Homo sapiens	Tuba1b;Nup160		R-HSA-9614369;R-HSA-9636128;R-HSA-9614343;R-HSA-9614367;R-HSA-9629004
R-HSA-168255	Influenza Infection	1	200	0.0140144	0.996099	0.996099	5	59	0.00434558	9606	Homo sapiens	Nup160		R-HSA-192627;R-HSA-168880;R-HSA-168337;R-HSA-1176059;R-HSA-192925
R-HSA-2559583	Cellular Senescence	1	200	0.0140144	0.996099	0.996099	1	90	0.00662886	9606	Homo sapiens	Pot1a		R-HSA-3785711
R-HSA-5619115	Disorders of transmembrane transporters	2	278	0.0194801	0.996134	0.996134	2	87	0.0064079	9606	Homo sapiens	Slc22a4;Nup160		R-HSA-5661474;R-HSA-5625674
R-HSA-3781865	Diseases of glycosylation	1	202	0.0141546	0.996311	0.996311	1	77	0.00567136	9606	Homo sapiens	Adamts15		R-HSA-6785565
R-HSA-5621481	C-type lectin receptors (CLRs)	1	203	0.0142247	0.996413	0.996413	6	68	0.00500847	9606	Homo sapiens	Map3k14		R-HSA-5607725;R-HSA-5607726;R-HSA-5607721;R-HSA-5607720;R-HSA-5607723;R-HSA-5607722
R-HSA-5689880	Ub-specific processing proteases	1	206	0.0144349	0.996701	0.996701	1	40	0.00294616	9606	Homo sapiens	Usp49		R-HSA-5696960
R-HSA-8868773	rRNA processing in the nucleus and cytosol	1	207	0.0145049	0.996792	0.996792	1	15	0.00110481	9606	Homo sapiens	Dimt1		R-HSA-6790994
R-HSA-397014	Muscle contraction	1	213	0.0149254	0.997288	0.997288	2	42	0.00309347	9606	Homo sapiens	Camk2a		R-HSA-427910;R-HSA-5576895
R-HSA-69278	Cell Cycle, Mitotic	7	596	0.041763	0.99737	0.99737	68	350	0.0257789	9606	Homo sapiens	Lin54;Cenpq;Orc6;Tuba1b;Ccnd1;Akt3;Nup160		R-HSA-9648017;R-HSA-375302;R-HSA-8964492;R-HSA-8942607;R-HSA-8961665;R-HSA-1638803;R-HSA-8964482;R-HSA-2990880;R-HSA-2990882;R-HSA-9615901;R-HSA-380316;R-HSA-8848414;R-HSA-2468287;R-HSA-8964498;R-HSA-8964525;R-HSA-9018017;R-HSA-8964513;R-HSA-75820;R-HSA-75823;R-HSA-75822;R-HSA-75825;R-HSA-75824;R-HSA-68914;R-HSA-8848436;R-HSA-68917;R-HSA-68916;R-HSA-68919;R-HSA-68918;R-HSA-9634219;R-HSA-8964531;R…
R-HSA-597592	Post-translational protein modification	28	1598	0.111975	0.997381	0.997381	59	526	0.038742	9606	Homo sapiens	Tpst1;Senp5;St8sia6;Tuba1b;Tmem132a;Adamts15;Fam20a;Fut4;Usp49;Piga;Rtn4rl1;Ctsz;Arfgap3;Cog7;Nup160;Pomgnt2;Pigt;Rnf135;C1qtnf1;Kctd15;Yod1;Ano8;Ino80d;Chd3;Hrc;Fstl1;Gas6;St8sia1		R-HSA-163843;R-HSA-8853379;R-HSA-5694418;R-HSA-4615872;R-HSA-5173192;R-HSA-5694417;R-HSA-8879117;R-HSA-5694428;R-HSA-5228508;R-HSA-6786034;R-HSA-162836;R-HSA-5696960;R-HSA-5689544;R-HSA-5694409;R-HSA-5228525;R-HSA-6807877;R-HSA-5228523;R-HSA-4551649;R-HSA-6807875;R-HSA-9668023;R-HSA-162730;R-HSA-8867370;R-HSA-3000348;R-HSA-5694439;R-HSA-8955706;R-HSA-936381;R-HSA-5693925;R-HSA-4570493;R-HSA-56944…
R-HSA-3700989	Transcriptional Regulation by TP53	5	487	0.0341251	0.997535	0.997535	11	259	0.0190764	9606	Homo sapiens	Rgcc;Chd3;Ccnt1;Akt3		R-HSA-6797606;R-HSA-198609;R-HSA-6805620;R-HSA-198599;R-HSA-6805650;R-HSA-6797616;R-HSA-6797712;R-HSA-6803917;R-HSA-6803914;R-HSA-6805785;R-HSA-6805640
R-HSA-382551	Transport of small molecules	14	961	0.0673394	0.997687	0.997687	20	443	0.0326287	9606	Homo sapiens	Cygb;Camk2a;Slc22a4;Aqp7;Ano8;Gng8;Abcb8;Sgk3;Slc16a3;Sat1;Add3;Dact3		R-HSA-427910;R-HSA-433698;R-HSA-427555;R-HSA-432195;R-HSA-2682349;R-HSA-382560;R-HSA-5340214;R-HSA-432074;R-HSA-2684901;R-HSA-8982617;R-HSA-549241;R-HSA-352119;R-HSA-422320;R-HSA-507871;R-HSA-5226999;R-HSA-507870;R-HSA-549297;R-HSA-507869;R-HSA-432188;R-HSA-507868
R-HSA-1266738	Developmental Biology	20	1263	0.0885012	0.998202	0.998202	32	556	0.0409516	9606	Homo sapiens	Med11;Cxcl12;Dpysl3;Shank3;Tuba1b;Col6a1;Col6a2;Mmp2;Ebf1;Irs2;Plxnd1;Dok2;Klf5;Akt3;Myo10;Hes1;Pik3cd		R-HSA-1183058;R-HSA-593672;R-HSA-381377;R-HSA-8855617;R-HSA-445071;R-HSA-399951;R-HSA-1183003;R-HSA-9622363;R-HSA-399947;R-HSA-560517;R-HSA-399944;R-HSA-560472;R-HSA-1980047;R-HSA-560473;R-HSA-445077;R-HSA-210836;R-HSA-9634442;R-HSA-8986258;R-HSA-211164;R-HSA-560491;R-HSA-560493;R-HSA-381283;R-HSA-375151;R-HSA-3928657;R-HSA-8855915;R-HSA-416683;R-HSA-416690;R-HSA-560510;R-HSA-381309;R-HSA-977271;…
R-HSA-983168	Antigen processing: Ubiquitination & Proteasome degradation	2	315	0.0220727	0.99847	0.99847	4	9	0.000662886	9606	Homo sapiens	Mib2;Znrf1		R-HSA-983147;R-HSA-983157;R-HSA-983156;R-HSA-983140
R-HSA-376176	Signaling by ROBO receptors	1	235	0.016467	0.998534	0.998534	1	60	0.00441924	9606	Homo sapiens	Cxcl12		R-HSA-8986258
R-HSA-72312	rRNA processing	1	245	0.0171677	0.998892	0.998892	1	21	0.00154673	9606	Homo sapiens	Dimt1		R-HSA-6790994
R-HSA-5668914	Diseases of metabolism	3	409	0.0286595	0.999133	0.999133	4	190	0.0139943	9606	Homo sapiens	Btd;Cyp2u1;Adamts15		R-HSA-3325540;R-HSA-5602242;R-HSA-6785565;R-HSA-4225086
R-HSA-72203	Processing of Capped Intron-Containing Pre-mRNA	1	256	0.0179385	0.999186	0.999186	12	32	0.00235693	9606	Homo sapiens	Nup160		R-HSA-77587;R-HSA-158481;R-HSA-159046;R-HSA-158484;R-HSA-159050;R-HSA-75097;R-HSA-75096;R-HSA-158441;R-HSA-75098;R-HSA-77594;R-HSA-158447;R-HSA-111439
R-HSA-68886	M Phase	3	416	0.02915	0.999266	0.999266	19	91	0.00670251	9606	Homo sapiens	Cenpq;Tuba1b;Nup160		R-HSA-9648114;R-HSA-9648017;R-HSA-375302;R-HSA-2467809;R-HSA-2467811;R-HSA-1638803;R-HSA-9634169;R-HSA-2990880;R-HSA-2990882;R-HSA-9615901;R-HSA-9668419;R-HSA-2484822;R-HSA-9615937;R-HSA-9634219;R-HSA-9618378;R-HSA-380316;R-HSA-2468287;R-HSA-9615945;R-HSA-1638821
R-HSA-8878171	Transcriptional regulation by RUNX1	1	261	0.0182888	0.999293	0.999293	2	132	0.00972232	9606	Homo sapiens	Ccnd1		R-HSA-8938867;R-HSA-8865320
R-HSA-71291	Metabolism of amino acids and derivatives	7	665	0.046598	0.999317	0.999317	9	285	0.0209914	9606	Homo sapiens	Dhtkd1;Csad;Carns1;Hoga1;Ckb;Sat1;Papss1		R-HSA-6784423;R-HSA-351207;R-HSA-6786245;R-HSA-2408540;R-HSA-2408525;R-HSA-1655443;R-HSA-6792572;R-HSA-351208;R-HSA-200318
R-HSA-1640170	Cell Cycle	8	734	0.051433	0.999469	0.999469	107	449	0.0330706	9606	Homo sapiens	Lin54;Cenpq;Orc6;Tuba1b;Ccnd1;Akt3;Nup160;Pot1a		R-HSA-9648017;R-HSA-375302;R-HSA-8964492;R-HSA-8961665;R-HSA-8964482;R-HSA-164617;R-HSA-2990880;R-HSA-164620;R-HSA-2990882;R-HSA-163090;R-HSA-912408;R-HSA-163099;R-HSA-8964498;R-HSA-163096;R-HSA-8964525;R-HSA-9018017;R-HSA-8964513;R-HSA-75820;R-HSA-75823;R-HSA-75822;R-HSA-75825;R-HSA-75824;R-HSA-163120;R-HSA-68914;R-HSA-68917;R-HSA-68916;R-HSA-68919;R-HSA-68918;R-HSA-9634219;R-HSA-8964531;R-HSA-1…
R-HSA-196854	Metabolism of vitamins and cofactors	2	379	0.0265574	0.999701	0.999701	4	206	0.0151727	9606	Homo sapiens	Btd;Nmnat2		R-HSA-197235;R-HSA-3076905;R-HSA-4167509;R-HSA-8939959
R-HSA-73894	DNA Repair	2	380	0.0266274	0.999709	0.999709	7	337	0.0248214	9606	Homo sapiens	Ino80d;Pot1a		R-HSA-9629216;R-HSA-5691006;R-HSA-9629483;R-HSA-9629195;R-HSA-9629497;R-HSA-9629372;R-HSA-9629373
R-HSA-211945	Phase I - Functionalization of compounds	1	299	0.0209516	0.999757	0.999757	1	98	0.00721809	9606	Homo sapiens	Cyp2u1		R-HSA-211960
R-HSA-2262752	Cellular responses to stress	11	952	0.0667087	0.999811	0.999811	18	381	0.0280622	9606	Homo sapiens	Ncf1;Tuba1b;Camk2a;Ddx11;Sod3;Nup160;Pot1a;Atf3		R-HSA-8951723;R-HSA-3780958;R-HSA-9635892;R-HSA-3780979;R-HSA-3299682;R-HSA-5618080;R-HSA-9653894;R-HSA-3697838;R-HSA-9653893;R-HSA-3785711;R-HSA-1791116;R-HSA-5252041;R-HSA-1222376;R-HSA-3299753;R-HSA-3697860;R-HSA-4837364;R-HSA-1791173;R-HSA-5082387
R-HSA-392499	Metabolism of proteins	37	2205	0.154509	0.999834	0.999834	80	798	0.0587759	9606	Homo sapiens	Tpst1;Senp5;St8sia6;Tuba1b;Tmem132a;Adamts15;Fam20a;Dact3;Fut4;Usp49;Piga;Rtn4rl1;Ctsz;Gng8;Arfgap3;Cog7;Inha;Nup160;Pla2g7;Cpa3;Pomgnt2;Ache;Pigt;Rnf135;C1qtnf1;Mmp2;Kctd15;Yod1;Ano8;Anpep;Ino80d;Fap;Chd3;Hrc;Fstl1;Gas6;St8sia1		R-HSA-163843;R-HSA-9023627;R-HSA-9023626;R-HSA-8853379;R-HSA-5694418;R-HSA-4615872;R-HSA-5173192;R-HSA-8850560;R-HSA-5694417;R-HSA-9023617;R-HSA-9023619;R-HSA-8879117;R-HSA-5694428;R-HSA-5228508;R-HSA-6786034;R-HSA-162836;R-HSA-5696960;R-HSA-2028294;R-HSA-9023633;R-HSA-9023632;R-HSA-5689544;R-HSA-5694409;R-HSA-5228525;R-HSA-6807877;R-HSA-5228523;R-HSA-4551649;R-HSA-6807875;R-HSA-9668023;R-HSA-162…
R-HSA-8953897	Cellular responses to stimuli	11	970	0.06797	0.999865	0.999865	18	412	0.0303454	9606	Homo sapiens	Ncf1;Tuba1b;Camk2a;Ddx11;Sod3;Nup160;Pot1a;Atf3		R-HSA-8951723;R-HSA-3780958;R-HSA-9635892;R-HSA-3780979;R-HSA-3299682;R-HSA-5618080;R-HSA-9653894;R-HSA-3697838;R-HSA-9653893;R-HSA-3785711;R-HSA-1791116;R-HSA-5252041;R-HSA-1222376;R-HSA-3299753;R-HSA-3697860;R-HSA-4837364;R-HSA-1791173;R-HSA-5082387
R-HSA-556833	Metabolism of lipids	20	1444	0.101184	0.999892	0.999892	52	954	0.0702659	9606	Homo sapiens	Ache;Med11;Awat2;Mgl2;Cyp2u1;Slc22a4;Acer3;Sptssa;Dpep2;Pla2g4a;Pik3c2a;Gba2;Cpn1;Stard3nl;Acbd6;Lipe;Ggps1;Hes1;Pik3cd;Mgll		R-HSA-1861788;R-HSA-1655832;R-HSA-1675928;R-HSA-1482900;R-HSA-1482771;R-HSA-1482897;R-HSA-163595;R-HSA-1676048;R-HSA-111883;R-HSA-560517;R-HSA-163602;R-HSA-1482759;R-HSA-1482884;R-HSA-2426161;R-HSA-5696448;R-HSA-266012;R-HSA-196126;R-HSA-165026;R-HSA-1675961;R-HSA-372519;R-HSA-8867876;R-HSA-163489;R-HSA-1482685;R-HSA-2161940;R-HSA-1482656;R-HSA-2161814;R-HSA-1676206;R-HSA-1482543;R-HSA-1675939;R-…
R-HSA-168256	Immune System	47	2684	0.188074	0.999904	0.999904	227	1623	0.11954	9606	Homo sapiens	Cd74;H2-Eb1;Ncf1;Tuba1b;Il17re;Lrrfip1;Fscn1;Ccl19;Trim46;Irs2;Cd248;Map3k8;H2-Aa;Ip6k2;Znrf1;Bcam;Camk2a;Akt3;Ctsz;Nup160;S100a9;Ifi30;Pik3cd;S100a8;H2-Ab1;Rnf135;Ccnd1;Mmp2;Mib2;Tap2;Anpep;Flt3l;Sod3;Crlf1;Cpn1;Dok2;Myo10;Efcab7;Map3k14		R-HSA-202245;R-HSA-202248;R-HSA-9604767;R-HSA-2130478;R-HSA-8863895;R-HSA-9604738;R-HSA-9606784;R-HSA-936475;R-HSA-2130486;R-HSA-5668417;R-HSA-9607301;R-HSA-9605259;R-HSA-9607304;R-HSA-2317314;R-HSA-6783556;R-HSA-2076220;R-HSA-9705137;R-HSA-1031716;R-HSA-9705145;R-HSA-8863914;R-HSA-1031713;R-HSA-202291;R-HSA-5668454;R-HSA-937022;R-HSA-451634;R-HSA-1168423;R-HSA-2317332;R-HSA-202307;R-HSA-8951498;…
R-HSA-212436	Generic Transcription Pathway	22	1555	0.108962	0.999914	0.999914	37	830	0.0611328	9606	Homo sapiens	Zfp35;Ccnd1;Kctd15;Zkscan1;Jarid2;Esr2;Zfp712;Zfp748;Rgcc;Chd3;Camk2a;Ccnt1;Akt3;Zfp655;Hes1;Zfp617;Zfp606;Zfp708		R-HSA-199299;R-HSA-6797606;R-HSA-8853956;R-HSA-198599;R-HSA-8865280;R-HSA-8853965;R-HSA-8952069;R-HSA-975040;R-HSA-1980047;R-HSA-198609;R-HSA-6805620;R-HSA-382096;R-HSA-9008412;R-HSA-6797616;R-HSA-9006992;R-HSA-8878237;R-HSA-8951442;R-HSA-8951443;R-HSA-8878243;R-HSA-376419;R-HSA-6803917;R-HSA-6803914;R-HSA-8864361;R-HSA-8865256;R-HSA-8865320;R-HSA-6805640;R-HSA-8952058;R-HSA-8939963;R-HSA-6805650…
R-HSA-168249	Innate Immune System	16	1334	0.0934763	0.999979	0.999979	86	710	0.0522943	9606	Homo sapiens	Rnf135;Ncf1;Lrrfip1;Anpep;Cd248;Map3k8;Cpn1;Dok2;Bcam;Myo10;Ctsz;S100a9;Efcab7;S100a8;Map3k14		R-HSA-6789092;R-HSA-166792;R-HSA-166286;R-HSA-166284;R-HSA-2855077;R-HSA-879362;R-HSA-6799350;R-HSA-2559414;R-HSA-933532;R-HSA-933530;R-HSA-936475;R-HSA-933528;R-HSA-3134904;R-HSA-933526;R-HSA-933527;R-HSA-3134901;R-HSA-8852509;R-HSA-933525;R-HSA-933523;R-HSA-3134896;R-HSA-9705137;R-HSA-2855054;R-HSA-6798528;R-HSA-933538;R-HSA-933539;R-HSA-9705145;R-HSA-933537;R-HSA-937022;R-HSA-990526;R-HSA-9363…
R-HSA-74160	Gene expression (Transcription)	26	1855	0.129984	0.999985	0.999985	67	1006	0.0740959	9606	Homo sapiens	Nfix;Zfp35;Ccnd1;Kctd15;Zkscan1;Jarid2;Esr2;Zfp712;Zfp748;Rgcc;Chd3;Camk2a;Ccnt1;Akt3;Zfp655;Hes1;Nup160;Zfp617;Zfp606;Ptrf;Zfp708		R-HSA-112385;R-HSA-199299;R-HSA-113411;R-HSA-113413;R-HSA-113412;R-HSA-113414;R-HSA-8865280;R-HSA-112392;R-HSA-112395;R-HSA-73739;R-HSA-427404;R-HSA-112396;R-HSA-8952069;R-HSA-1980047;R-HSA-6805620;R-HSA-113429;R-HSA-382096;R-HSA-9008412;R-HSA-6810238;R-HSA-9006992;R-HSA-8878237;R-HSA-8951442;R-HSA-8951443;R-HSA-6810235;R-HSA-6810234;R-HSA-6810233;R-HSA-212252;R-HSA-8878243;R-HSA-212263;R-HSA-680…
R-HSA-73857	RNA Polymerase II Transcription	22	1694	0.118702	0.999992	0.999992	58	891	0.0656257	9606	Homo sapiens	Zfp35;Ccnd1;Kctd15;Zkscan1;Jarid2;Esr2;Zfp712;Zfp748;Rgcc;Chd3;Camk2a;Ccnt1;Akt3;Zfp655;Hes1;Zfp617;Zfp606;Zfp708		R-HSA-112385;R-HSA-199299;R-HSA-113411;R-HSA-113413;R-HSA-113412;R-HSA-113414;R-HSA-8865280;R-HSA-112392;R-HSA-112395;R-HSA-112396;R-HSA-8952069;R-HSA-1980047;R-HSA-6805620;R-HSA-113429;R-HSA-382096;R-HSA-9008412;R-HSA-6810238;R-HSA-9006992;R-HSA-8878237;R-HSA-8951442;R-HSA-8951443;R-HSA-6810235;R-HSA-6810234;R-HSA-6810233;R-HSA-8878243;R-HSA-6803917;R-HSA-6803914;R-HSA-112430;R-HSA-8865320;R-HSA…
R-HSA-9709957	Sensory Perception	1	493	0.0345456	0.999999	0.999999	1	139	0.0102379	9606	Homo sapiens	Awat2		R-HSA-2465919
R-HSA-5663205	Infectious disease	12	1357	0.0950879	1	1	44	752	0.0553878	9606	Homo sapiens	Rest;Chd3;Tuba1b;Ccnt1;Myo10;Mc5r;Gnai2;Gng8;Dpep2;Crbn;Nup160;Dact3		R-HSA-9660819;R-HSA-167234;R-HSA-167235;R-HSA-9681169;R-HSA-392129;R-HSA-1861595;R-HSA-9660824;R-HSA-180622;R-HSA-9614367;R-HSA-9660828;R-HSA-167181;R-HSA-170706;R-HSA-170704;R-HSA-168337;R-HSA-9614343;R-HSA-167191;R-HSA-266012;R-HSA-167192;R-HSA-9629004;R-HSA-167196;R-HSA-192925;R-HSA-167197;R-HSA-167459;R-HSA-180710;R-HSA-167076;R-HSA-167077;R-HSA-1176059;R-HSA-167150;R-HSA-167148;R-HSA-167084;…
R-HSA-1643685	Disease	32	2431	0.170345	1	1	84	1632	0.120203	9606	Homo sapiens	Tpst1;Tuba1b;Cyp2u1;Slc22a4;Lrrfip1;Dpep2;Adamts15;Irs2;Dact3;Rest;Camk2a;Akt3;Hes1;Gng8;Nup160;S100a9;Pik3cd;S100a8;Ccnd1;Mib2;Flt3l;Esr2;Btd;Chd3;Ccnt1;Myo10;Mc5r;Gnai2;Rrbp1;Crbn;Papss1		R-HSA-9660819;R-HSA-9681169;R-HSA-6802916;R-HSA-9656212;R-HSA-6802927;R-HSA-9660824;R-HSA-6802924;R-HSA-180622;R-HSA-9614367;R-HSA-9660828;R-HSA-167181;R-HSA-6802935;R-HSA-6802934;R-HSA-2220979;R-HSA-6802933;R-HSA-168337;R-HSA-6802932;R-HSA-9614343;R-HSA-167191;R-HSA-9659782;R-HSA-5602242;R-HSA-266012;R-HSA-5602383;R-HSA-167192;R-HSA-6802941;R-HSA-167196;R-HSA-192925;R-HSA-167197;R-HSA-5625674;R-…
R-HSA-8953854	Metabolism of RNA	3	783	0.0548665	1	1	17	187	0.0137733	9606	Homo sapiens	Dimt1;Nup160;Edc3		R-HSA-429860;R-HSA-159046;R-HSA-159050;R-HSA-158441;R-HSA-158447;R-HSA-111439;R-HSA-77587;R-HSA-191825;R-HSA-158481;R-HSA-191830;R-HSA-6790994;R-HSA-158484;R-HSA-75097;R-HSA-75096;R-HSA-75098;R-HSA-77594;R-HSA-6783483
R-HSA-1430728	Metabolism	49	3646	0.255483	1	1	106	2260	0.166458	9606	Homo sapiens	Tpst1;Awat2;Acy3;Cyp2u1;Slc22a4;44443;Sptssa;Dpep2;Pla2g4a;Sat1;Gba2;Ip6k2;Dact3;Fut4;Dhtkd1;Cygb;Csad;Ggps1;Hes1;Gng8;Ckb;Slc16a3;Nup160;Nmnat2;Pdk2;Pik3cd;Mgll;Csgalnact2;Ache;Med11;Mgl2;Man2b2;Acer3;Ak5;Pik3c2a;Cpn1;Acbd6;Stard3nl;Btd;Lipe;Gnai2;Gstt2;Carns1;Hoga1;Papss1;Nt5c3		R-HSA-9603986;R-HSA-1655832;R-HSA-9603984;R-HSA-1971482;R-HSA-1482771;R-HSA-3076905;R-HSA-163595;R-HSA-1676048;R-HSA-111883;R-HSA-9638046;R-HSA-381706;R-HSA-163602;R-HSA-1482759;R-HSA-825631;R-HSA-5340226;R-HSA-2426161;R-HSA-266012;R-HSA-6792572;R-HSA-196126;R-HSA-8954262;R-HSA-372519;R-HSA-427555;R-HSA-170796;R-HSA-2161940;R-HSA-174389;R-HSA-110137;R-HSA-1482543;R-HSA-174392;R-HSA-110138;R-HSA-8…
